# Supplementary material
Source: MDPI journal article supplement (https://www.mdpi.com/2306-5729/6/4/40)
Supplement: s1 [file s1]

ID	Left_Sequence	Left_Tm	Left_GC	Left_Penalty	right_sequence	Right_Tm	Right_GC	Right_Penalty	Product_Size	Pair_Penalty	Motif	Repeats
30	AGCCGAGAAACTGTTAGCTTC	59.063	47.619	1.937	CAGTCAGCTTTAACGGATCTCC	59.562	50	2.438	127	4.375	AACT	13
51	TGTAGCATTGGTGGACTGATAC	58.629	45.455	3.371	TGTGGGAGTTTATGTGGGATAG	58.005	45.455	3.995	122	7.366	A	10
96	GGTCGAAAGGTTCAGATGCAG	60.013	52.381	1.013	GTGCCTGAATGTGATCACGG	60.012	55	0.012	146	1.025	AAAC	14
155	ATCTCGATTGTGTTACCGGC	58.810	50	1.190	TTGCACAAGAAGCCTCATGG	59.507	50	0.493	121	1.683	A	10
195	CGTGCACCCAGAATTTCTCC	59.941	55	0.059	CGGCCGTTACAGTGTTATATTG	58.295	45.455	3.705	122	3.764	C	10
289	TCGACGCATCCATTCCTCTC	60.364	55	0.364	AGGGCGAATTGGTATGATACAC	59.026	45.455	2.974	102	3.339	A	10
330	CATCGCACGAATTGAACTCAC	58.967	47.619	2.033	CCTGTTTCTGGCCAATAACATC	58.383	45.455	3.617	125	5.651	AAT	10
338	GGGTGGTATTATGAGGGCAC	58.490	55	1.510	TTGTTCCGGGATATGTGGCC	60.874	55	0.874	105	2.384	A	11
360	ACTAGCCACCAGACAGATCG	59.650	55	0.350	ACACACCTCCACAACTCCTC	60.007	55	0.007	118	0.356	C	24
574	TTATTCCCATTTGCGGTGCG	60.293	50	0.293	ACACGTAGAGTCGCACGC	60.845	61.111	2.845	101	3.139	A	11
807	CCAACCGACTCCGTACGTAC	60.914	60	0.914	AAATTCAACCTGCGCTGGAC	60.152	50	0.152	141	1.066	AC	29
893	CTGACTATGCAAGGCCGTAC	59.170	55	0.830	TTCATGGCGTGGACAGGTAC	60.794	55	0.794	130	1.624	A	12
1001	AAAGTGTGACATCTCTCCCAG	58.073	47.619	2.927	AGACGTTCAGGAGACGCTC	59.863	57.895	1.137	130	4.064	AAAC	13
1293	CTGCCTGTCTGTCCGTCC	60.475	66.667	2.475	CCCGCCCAGTGTTTCAATAG	59.655	55	0.345	116	2.820	ACGG	10
1331	ACTGTATGTACCGCCAAGTG	58.371	50	1.629	CCTTTAATTCTGCAGCTCAAGG	58.389	45.455	3.611	127	5.241	C	10
1386	CTGCTTGACCCTTGAAGACG	59.591	55	0.409	CCGCAGATCCATGCCTTAG	58.819	57.895	2.181	129	2.590	A	11
1647	TTGCTTGCTTGTTTGGGTGG	60.581	50	0.581	AACCAGCTAACCAACGATCC	58.646	50	1.354	114	1.934	AACC	9
1653	CCACACACATACGGACGGG	61.187	63.158	2.187	CACCAAGACGACGATCAAGC	60.015	55	0.015	134	2.202	AAC	8
2304	GCGTCCACCTAGTGTCCTAC	60.293	60	0.293	CGTGGCACTAAACATAGGTGG	59.743	52.381	1.257	115	1.550	C	16
2456	GATCTGTCTGTCGGTCGATC	58.341	55	1.659	CGACAGACAGATCGACCG	58.042	61.111	3.958	105	5.617	ACAG	6
2463	CTTCTTCTTCGCTTGCGCC	60.591	57.895	1.591	GTTTGGTGTGGCTGCAGTC	60.379	57.895	1.379	103	2.970	C	16
2564	GAAAGCGCCTCGATGTTACG	60.426	55	0.426	TCGTTCAGCTAGCATCCGTG	60.923	55	0.923	104	1.349	A	10
2706	AGTAGTATTTAGTCGCCGCATG	59.112	45.455	2.888	TTTCCCTGGCGTACTGAGTC	60.152	55	0.152	138	3.040	A	10
2721	GGTCACTTTCCATTGGACTTTC	58.253	45.455	3.747	TTGACTAGCTGGTGAACTGTC	58.371	47.619	2.629	123	6.376	AACT	10
2802	CAGTGCCTCAACCAACTGC	60.084	57.895	1.084	CAAATGAACTAACACGGCAACC	59.441	45.455	2.559	121	3.644	AAT	16
3416	ACGGGAAGAATAAGGAACACG	58.787	47.619	2.213	TCCGTCCCTACATTGTCGAG	59.653	55	0.347	112	2.560	A	11
3736	ACCACCGTCAGCATAACTTG	58.942	50	1.058	AGTGCGGTTCTGTTTGACTTG	60.08	47.619	1.080	130	2.137	AC	9
3963	CTGAGTGTGATCGTGAAGCC	59.384	55	0.616	GCGGAAGTTAAATTGCACATCC	59.568	45.455	2.432	120	3.048	C	14
4019	TCATGATGTTCAGAGGGACAAC	58.825	45.455	3.175	GGTGAACCGAGCAGAAAGTG	59.872	55	0.128	117	3.303	A	10
4146	GGATTGCCGGCTGTGTTAG	59.641	57.895	1.359	CTGTTGTTCCGGACCAAAGG	59.798	55	0.202	111	1.561	AAAC	12
4199	TTTAGTGTTAGAGCAGACGGG	58.168	47.619	2.832	TCTGCCCTTTACCGATGACC	60.224	55	0.224	139	3.055	C	10
4376	TGCAGCCGTTCTATAGGTCG	60.364	55	0.364	GCAGCTCAAAGGGAAGTCAC	59.87	55	0.130	111	0.494	A	13
4760	CAGACTTCAGGCTTTCATCCAG	59.752	50	2.248	AACTTGACAAATCTGCCGCC	60.152	50	0.152	130	2.400	A	12
4971	CCCTCAAGCGGACCAAATTC	59.939	55	0.061	AAGAAGTTGGCCGTGACATG	59.513	50	0.487	116	0.548	A	11
5241	GTCTGTAGGCGCATGATGTC	59.525	55	0.475	GGCTCCGCTGTTCTTTATGG	59.729	55	0.271	120	0.746	AC	8
5294	CTTGCTGGGACTGTGGGTTAG	61.376	57.143	2.376	CCCGGCCCATCTCATTCTTC	61.297	60	1.297	100	3.673	C	14
5562	TCAACAAGTTCGGGAATTGGC	60.147	47.619	1.147	AATGTCAGGGTGTCGACTGG	60.438	55	0.438	111	1.585	A	11
5944	TGATCACAAAGACTGACGGC	58.950	50	1.050	CAAATGCCAGGGTACAGTAGAG	59.227	50	2.773	100	3.822	A	13
6066	GTGGCTCTGACTGTCACAAG	59.237	55	0.763	CAAACACACTCCAAGCCCG	60.084	57.895	1.084	105	1.847	C	15
6107	TGAGGCTTCAGATTTCGCAAC	59.945	47.619	1.055	AGATCGTTGCGCCTATACGG	60.782	55	0.782	102	1.838	C	15
6126	AAGCGTCGCGAACTGATTTC	60.291	50	0.291	TTGTATAAACGTCGCACCGG	59.387	50	0.613	120	0.903	A	10
6132	TGCAGGCATGTATTTCGAGAC	59.472	47.619	1.528	ACATCTCCCTCGTTGAAGGC	60.51	55	0.510	101	2.039	AT	8
6162	GTATTACCTGTGAATTGCGCTG	58.803	45.455	3.197	AAGAGGCTATGGACCTGTCG	59.647	55	0.353	126	3.550	AATG	9
6306	ACGCACCGCAGCCATAAG	61.555	61.111	3.555	GTTTCAATCCACCGGTGCTC	60.223	55	0.223	101	3.778	A	10
6460	ACTTGTCCTGAGCCACCAG	60.005	57.895	1.005	ACACACCGGTCACTCTCTTG	60.366	55	0.366	115	1.371	A	27
6471	CATGGTGATGACATACGCCG	59.875	55	0.125	CAGTGGAATTCGGTCTGTATCC	59.299	50	2.701	105	2.826	A	10
6843	GTTGGACCACACCTAGCTG	58.513	57.895	2.487	ACCCTCCTTTCACTCCAAGTC	60.076	52.381	1.076	139	3.563	C	18
7227	TGTGGTGCAACAAACTCAGG	59.652	50	0.348	GAGAAGCCCTACCCTGTACG	60.009	60	0.009	143	0.357	AG	8
7504	TTTCCACTTTGCAGGCAGTC	59.723	50	0.277	TGGGTCAATGAATCAGCTGC	59.291	50	0.709	125	0.986	A	10
7505	CCGTTGCGTAGTTCAGTAGTC	59.487	52.381	1.513	TCACAGGGTTGCACAATAAGC	59.874	47.619	1.126	126	2.639	A	10
8087	CATTACAGCAACACCTCGCC	60.292	55	0.292	GACCCACCTTTACCTGTATGTC	58.895	50	3.105	113	3.397	C	13
8192	ACTGTTGTGAGTGTGAAGCC	59.084	50	0.916	GCTTCCTCTTCTTCCAACCC	58.93	55	1.070	106	1.986	C	13
8213	ATCCACCGTCCTGAGATGTG	59.936	55	0.064	ATTTGCGAACGAATGGTGTAC	58.276	42.857	2.724	136	2.789	A	12
8287	TGAAGACCAGGAAAGCTGTTG	59.187	47.619	1.813	ACATGTTTCAAATTCCGGCG	58.395	45	1.605	128	3.419	C	17
8376	GGGAGCAATTATAAGGACGTGG	59.621	50	2.379	TAAACAGACGTGGGCCAGTC	60.722	55	0.722	102	3.101	A	11
8650	TTGAGCCTGCGTTGAGTTTG	60.082	50	0.082	TCTGAGTGTGATCGGGAAGC	60.223	55	0.223	101	0.305	A	13
8665	AGCGTGATCAAGAGGGAGC	60.232	57.895	1.232	ACATGAAACGCCTCCTGTAG	58.366	50	1.634	129	2.867	AC	11
8810	GCTGGTTGGCTGGTTCATG	60.158	57.895	1.158	AACCAACCACCCAGCCAG	60.567	61.111	2.567	115	3.724	AACC	10
8820	AGTGTCAGTTATGGTGCCAG	58.279	50	1.721	ACTTGTTTGTTTATGCGTGCTC	59.119	40.909	2.881	141	4.602	AC	21
9015	ACTAACGCTACCCACGTCC	59.860	57.895	1.140	AGGTAGAGCAAATTTCCGCC	59.005	50	0.995	134	2.135	A	13
9070	AATCTGGGAGCCTCAACCTC	59.859	55	0.141	AGCAACGCAGAAGTAACAAGAG	59.949	45.455	2.051	118	2.192	A	12
9114	TATGAGTCCAGCTGTGAAGC	58.074	50	1.926	GTGGAGGAAGCGAGTTACTTTG	60.014	50	2.014	112	3.940	A	11
9189	ACCTGAGAAGTGCTGGACG	60.083	57.895	1.083	AGAACTTGGTCCTGTATTGCTG	59.089	45.455	2.911	103	3.994	AAT	11
9239	AGCGCAACTCACTGAACAC	59.424	52.632	1.576	TCGCGAACATCAGGACCTAG	60.011	55	0.011	111	1.587	A	12
9450	GCAAAGAAGCTAGGATGTCAAG	58.139	45.455	3.861	CGCTGCTAAAGTCGTGTCAG	60.016	55	0.016	126	3.877	C	13
9650	CCCGCATTGCACGAGTATTC	60.430	55	0.430	AGTTCCAGGAGCACGAGTTC	60.437	55	0.437	147	0.867	A	13
9678	GGCACAAATACTCTGTGATGC	58.334	47.619	2.666	GCTGGAACTTTGGCCTTCAG	60.152	55	0.152	112	2.818	A	11
9754	ACCATTCCGTTCCCTGTGTC	60.727	55	0.727	CAGGCCTCCTCGCTGTTC	60.864	66.667	2.864	126	3.591	C	14
10046	GAACCGCATCTTCGATCGAG	59.603	55	0.397	GCGAGCTGTTGTGGAACC	59.78	61.111	2.220	105	2.617	A	10
10055	CTTTGAAAGTGCCGCGCG	61.505	61.111	3.505	GGTACAAAGACAACGTTCCCTC	59.949	50	2.051	110	5.556	A	10
10197	TTTCCGCCATCTTGAAAGCC	59.867	50	0.133	TTATTGGTATCGTCACTGCGG	58.933	47.619	2.067	100	2.201	ACT	11
10557	GTTAGAGGCTGAGTCGACCC	60.294	60	0.294	CACTGAGCTAGAAACCGGAAG	59.137	52.381	1.863	120	2.157	A	10
10567	GCTGACTGTAGATGCGTTACG	59.885	52.381	1.115	AGGCTCGGTGGTCTTATGTG	60.223	55	0.223	108	1.338	AAT	14
10610	TGTTTGCGTTTCTGTCCTCG	59.804	50	0.196	CCCTCCTTACACCAACCAAC	58.855	55	1.145	134	1.342	C	14
10614	CCCTCGCGGATAAGATACCG	60.573	60	0.573	GTGACCGATAATGTGGCACG	60.083	55	0.083	137	0.656	A	10
10659	TGAGAGACTGGCGACTACAC	59.584	55	0.416	AATGCCGACCGAAACATTGG	60.223	50	0.223	101	0.638	A	10
10797	TCGGGAATTCATAGAGACAGGG	59.810	50	2.190	CAATTACTCATCCCAGGCGC	59.799	55	0.201	132	2.391	A	12
10956	AAGCTCCTCGTGTATCCGC	60.306	57.895	1.306	CTCCGCGTATTGGACAACTG	59.736	55	0.264	121	1.570	C	13
11011	AGAGGGTTCAGTGAGACAGG	59.131	55	0.869	TGATGCGTCTGGTAGCCTG	60.232	57.895	1.232	100	2.101	C	11
11145	CGGCGATTTAAGGCAGCC	60.011	61.111	2.011	CAACCTAATCGCGCCTCTTC	59.805	55	0.195	147	2.206	C	15
11372	CGGAAGTGATGTAAGCGGAC	59.457	55	0.543	CACAACAAAGAGATGCTCCAAG	58.595	45.455	3.405	124	3.948	A	10
11422	GCCTTTAGAGACCACCCAAC	58.934	55	1.066	ACCATGCATCATTTCAGGGC	59.646	50	0.354	130	1.420	AC	16
11492	ACACACTTGGACTTTGTTGACC	60.011	45.455	2.011	GTTTATCCCACCCGCAACG	59.938	57.895	1.062	132	3.073	C	14
11837	TGAGCACCATTTGTTACGGG	59.224	50	0.776	CTTCCTTTGCCCACACAGTG	60.081	55	0.081	107	0.857	AC	25
11872	TGTTGAGACATTGTGCAGAGAC	59.624	45.455	2.376	TGGTGACCTACATTTGGCAAC	59.529	47.619	1.471	119	3.848	AC	17
12122	TCTTCTATGGCGCGACAGAC	60.643	55	0.643	GTCGACTGGCTAAACATGTAGG	59.564	50	2.436	132	3.079	ATC	16
12135	AATATCAATGGAGCAGGGACC	58.259	47.619	2.741	ACCTCTTTACCTCCACTACGC	59.941	52.381	1.059	102	3.800	AC	10
12182	GGGACTGGTCAGGTTGCG	61.100	66.667	3.100	AGCATTTCAGAGTGTGTGGTAG	59.095	45.455	2.905	135	6.005	A	11
12430	TGCCTTTATTTGCCTGCCTG	59.864	50	0.136	GCAAACCAAAGAAGGCAGAAC	59.274	47.619	1.726	123	1.862	AGGC	6
12513	GGGTACGTTGTGCAATTGTG	58.690	50	1.310	GCAGAGAGTATTGTGCAGACC	59.474	52.381	1.526	109	2.836	AC	27
12759	ACCTACTACCTGCCTGCC	58.710	61.111	3.290	AGCTTCTCATGGACTCTACTCC	59.478	50	2.522	128	5.812	ACCT	9
12853	CCAGTAACTGTCGCATGTCC	59.381	55	0.619	ATTGTTGGGCAGTGGTTGG	59.321	52.632	1.679	150	2.298	A	10
12859	CAGAGTCAGGTAAAGCTTCCG	59.137	52.381	1.863	AGCCAATCCTCTTTAGCCATAG	58.411	45.455	3.589	129	5.452	A	10
13097	TGAGTTCTTAGTCGCGTTGG	58.679	50	1.321	TGAGTTGTTGAATGCGGACG	59.873	50	0.127	117	1.447	ACAG	6
13151	TAGTTGGTCGGTTGGTTAGC	58.293	50	1.707	ACGTTAGACTGCAAGTTCCG	58.96	50	1.040	101	2.747	AACC	13
13260	ACGGTAGGTGTCGAGGTTG	59.785	57.895	1.215	GAGATCTCTGTGACGGGCC	60.306	63.158	1.306	132	2.521	AC	17
13364	CAGCTCATGAAGTAGGCCC	58.356	57.895	2.644	TCTGCTGTATGGTGTTAGTTGC	59.426	45.455	2.574	118	5.218	AAGT	7
13432	GTGCCTGAGTGTGATCAAGTG	59.946	52.381	1.054	GCATCGTTATCAGAGGTACACG	59.699	50	2.301	140	3.356	AAACG	6
13550	TCAGCACAAATCAGCCACTG	59.511	50	0.489	CAGTCACTGTTTGCTGTCTTG	58.411	47.619	2.589	104	3.078	A	16
13564	CACAGGTGCAGCAGTTACAC	60.152	55	0.152	CCCTTGATTCCATAACAACCAC	58.044	45.455	3.956	121	4.109	AAT	11
13660	TCGCTTTGTCACTGTCAGAAAG	59.885	45.455	2.115	ACTTGACGTTCTCTGTCCCG	60.435	55	0.435	137	2.549	A	10
13701	GGGTGGGAAATGAACGACTC	59.300	55	0.700	TGTGGGCGCGTGTGATATAG	60.996	55	0.996	132	1.696	AC	37
13976	ACGTGCCTGATGATAGAATCTG	58.773	45.455	3.227	GCTTAACACTGGCTCGTGTG	60.222	55	0.222	117	3.449	AC	13
14015	GTGTTCGGCAGAGTATATCGG	59.079	52.381	1.921	ACCTTCCTTCTCAGTGACTACG	59.945	50	2.055	113	3.975	A	10
14073	GTAACCAACACCAGAGCCG	59.198	57.895	1.802	AGAGGTGCTGGCAAGTGAG	60.384	57.895	1.384	128	3.185	AC	18
14086	GGAATCAGAGGGCATTCAAGC	60.079	52.381	1.079	GCAACCGTAAAGTTTGCAGC	59.601	50	0.399	105	1.478	A	12
14182	AAATTTCTGTTACTGACGCACC	58.269	40.909	3.731	GCTGGTACTGATGTATGGTACG	59.112	50	2.888	112	6.619	A	11
14289	CCATATTGAATTCGGCAAGTCG	58.867	45.455	3.133	TTGCCGTCCATATTCACACG	59.379	50	0.621	113	3.754	AC	8
14434	GGGAATTTCGTAGCTAGCTGAG	59.368	50	2.632	CATCTGCGTGAATGAATACGTG	58.882	45.455	3.118	133	5.750	AAAC	10
14510	ACGAACATATTGCCTCCAGAG	58.574	47.619	2.426	ATAGAACTGAGGCGAGGGTG	59.647	55	0.353	117	2.779	AC	18
14579	AGCACACCGGTCTCTGTTAC	60.436	55	0.436	CACACAGCCCGTTTGTCTG	60.085	57.895	1.085	137	1.521	AGC	9
14591	ATTGGTAGTCAGGGCAGCTC	60.224	55	0.224	GGAAGGCTTGGAAATGACGC	60.574	55	0.574	122	0.797	C	13
14719	GCCTAAGCCCACAATATAGGG	58.694	52.381	2.306	AACTCCGTACTGCTGGTTTC	58.585	50	1.415	136	3.720	AAAC	10
14872	ATGAATGGTTGGACGGATCG	58.798	50	1.202	CTCGCTCAGTCAGGTTCCTC	60.575	60	0.575	118	1.777	AACC	9
14926	ATTGTCGTCACTTTCCTCGC	59.311	50	0.689	GGTTCCGAACAGTGCAGTTG	60.431	55	0.431	133	1.120	ATC	11
15022	AAACTGCTGGACAAATTACACG	58.529	40.909	3.471	AAGTATACGCCACAGAGAAGC	58.586	47.619	2.414	105	5.885	ATC	11
15046	GCTGTTCTCGTCTTCAGGTG	59.315	55	0.685	ATTCACCAGCACCACTCTG	58.115	52.632	2.885	109	3.570	C	14
15237	CTCTTCAGTAATGGTCGGATCC	58.775	50	3.225	TGTAAGTGCGAATACCCTGC	58.731	50	1.269	112	4.494	AAT	10
15248	ACCACCTGCTACATTAGTGC	58.354	50	1.646	GTTACCACGTTGCAGTCACC	60.153	55	0.153	110	1.798	A	12
15484	CTGTCTAAGGCGTGGGTCC	60.530	63.158	1.530	GAGACCACTAGCTGACCACC	60.223	60	0.223	121	1.753	C	12
15838	GCCGAAACATGTAGGAGGTAG	58.929	52.381	2.071	CTGTTTGTGAGTCGACGTGG	59.877	55	0.123	146	2.194	AC	12
16082	CTGAGTGTGATCGTGAAGCC	59.384	55	0.616	ACAGGAAGCCAGTGATTGTAG	58.424	47.619	2.576	121	3.192	A	11
16414	CTAACCACTCACCTCCGTCC	60.223	60	0.223	TGTCACAACTCTCCTCAATCG	58.449	47.619	2.551	135	2.774	C	13
16662	CTTCGTACCAAACCGCACAC	60.498	55	0.498	TTGGTTGGTTGGTCAGTCAG	58.709	50	1.291	126	1.789	ACTG	7
16913	TGCTCAAAGTCGGTGTAGAATC	59.170	45.455	2.830	ATCTTCCTCGGCTCTGGTG	59.552	57.895	1.448	148	4.278	AC	13
17054	CGAGACAAAGAGTTCGTCGG	59.398	55	0.602	AAAGCACACCCTGGACCTC	60.31	57.895	1.310	123	1.912	C	14
17131	GCTTTCAGACGCTAAGTGGC	60.292	55	0.292	AAGTTCGGGTCATGGTCCAG	60.44	55	0.440	134	0.732	AC	11
17293	GAGTAGAACGCAGCGCTTG	60.015	57.895	1.015	ATTCCAATGGGCAAGGCTGG	61.755	55	1.755	103	2.770	A	11
17316	TGTTGTCCATTTCGCTGTGATC	60.271	45.455	2.271	CTGGGTGCAGCTGAAATAGG	59.367	55	0.633	112	2.904	A	10
17514	GGGTTCCCACGAGACTTCAC	61.073	60	1.073	CCCACCGTCCATAACTTCG	58.679	57.895	2.321	124	3.394	A	15
17760	CCTCTCCCGTACCCATTGAG	60.008	60	0.008	TCTAGTTGTACCGCTGCTGC	60.857	55	0.857	109	0.865	AGC	9
17825	AGGTGGTAGATACTTGGTCAGC	60.009	50	2.009	GTTGACAGTTCTGTGGCTCC	59.516	55	0.484	115	2.492	A	19
17927	CACCATCAGACGCACCATTC	60.012	55	0.012	GCATTGTCCGCCAGTCTAAC	60.013	55	0.013	123	0.025	A	10
18121	GGATTTCCTAGTACAGTCGAGG	58.187	50	3.813	TAGCCACACACGTCCTACTG	59.867	55	0.133	114	3.946	A	10
18568	AATCAGTCAGAGAGTCGGCC	59.937	55	0.063	AACGCCTCAGTGACTAACAG	58.307	50	1.693	115	1.756	ACTG	7
18580	GGTTAGGAATCGACGCACAC	59.737	55	0.263	CCCTCCACCAGTGTCATTTG	59.219	55	0.781	123	1.044	A	10
18867	GGTGAGGGTGTGGTGGATC	60.460	63.158	1.460	ACCCACTAAACCAACCACCC	60.591	55	0.591	105	2.051	C	11
18979	ATGGGTGGACGGACTGAC	59.366	61.111	2.634	GTCTCTCTGTTCGTCCGTCC	60.571	60	0.571	106	3.205	C	12
19037	GTGATGGTGGACAGTCGTAAC	59.410	52.381	1.590	AGATAGGTTTCGCACACTAAGC	59.234	45.455	2.766	109	4.355	A	10
19149	AACGGAAGAGGGAGGAAGTG	59.789	55	0.211	CTCACATCCTCCCTCGTCTG	60.01	60	0.010	122	0.220	AG	8
19317	GACGGGCTGACTACTCGTTC	60.917	60	0.917	CCTTATCGGGCCTAAACAGC	59.157	55	0.843	135	1.761	AC	27
19608	GGATTTGTTGACCAGTTAAGCG	58.925	45.455	3.075	ATCGCCGTCAGAAGCTCTC	60.306	57.895	1.306	104	4.380	AC	11
19674	TCTTCACCGTGAGCCTGATG	60.508	55	0.508	TGGTGTAGGACTGCTGCAAC	61.009	55	1.009	119	1.517	AAT	10
19888	TCGAGATTCCGTCCATCCAG	59.723	55	0.277	AAACCCTACATTCCTACCACAC	58.478	45.455	3.522	102	3.799	A	13
19983	GTGAGTGAGAGTGAATGAATGC	58.151	45.455	3.849	ACGCATTCACTCACTCGC	58.862	55.556	3.138	110	6.988	ACTC	6
20033	GATAGGCTTCTGGTCCGCTG	61.001	60	1.001	TGTTGTATTTCTTGTGCGATGC	58.926	40.909	3.074	116	4.075	ACTG	6
20080	TAGATCATGGAGGCAGCAGG	59.715	55	0.285	AGAAGTACTGTTTGAAGGAGGG	58.148	45.455	3.852	137	4.137	C	11
20086	AAGCGTGTCTATGTCAGCTG	58.742	50	1.258	CGCCTTTGTGACGGTAATCC	60.013	55	0.013	108	1.271	C	14
20214	GTTTCCTCAGACCGCCTTTG	59.870	55	0.130	GTGGGTCTTGGGCTCTCATC	60.869	60	0.869	137	0.999	C	16
20321	GACGACTAAGCTCTTGGGTC	58.461	55	1.539	ACAATCTCATGTCCAAGCCG	59.01	50	0.990	122	2.528	C	10
20740	AGCATAGCCCTGTATCGCAC	60.722	55	0.722	TTTGAACACCGAACCCACTC	59.082	50	0.918	109	1.639	ACAGT	6
21045	AGCTGAGAAGTGAGAAATTCGG	59.166	45.455	2.834	CACCGCATTCTGTTTCGAGG	60.291	55	0.291	135	3.126	ATC	9
21052	TACACTGCCAGCTGTTGTTG	59.442	50	0.558	CCCACCCACACAGATCCATG	61.161	60	1.161	129	1.718	AAC	8
21508	AGACAAAGTGTTTAGCGCCG	59.873	50	0.127	CAGAAGTTCGGAACCCTCAAG	59.335	52.381	1.665	132	1.792	AAT	15
21514	CAGGCAAGTAACAAGGAAATGG	58.580	45.455	3.420	TTAAACACCCGCGATTGTCC	59.588	50	0.412	116	3.832	C	13
21616	AGCGTTTCAGGTCAGAGTATC	58.242	47.619	2.758	GCTGTTCCTCTTACTTCACCC	59.056	52.381	1.944	119	4.702	C	10
21787	TGTCCGATCTGTCTTATGTACG	58.204	45.455	3.796	GACGGACGGACAGATGTATAG	58.204	52.381	2.796	144	6.592	AC	23
21789	CTGTTGCACCGAACCTTGTC	60.431	55	0.431	CACACAGTCGTTCTTTCCGC	60.497	55	0.497	118	0.928	A	10
21846	ACCATTAAGAACGGTGATGTCG	59.496	45.455	2.504	TGAAGTATTTGGCGTCAGAGC	59.404	47.619	1.596	108	4.100	A	18
22138	ACCCTTCAGCCAGTATCAGC	60.224	55	0.224	CCATGACTCAATGACAGTGTCC	59.753	50	2.247	118	2.471	A	10
22189	GAAGGAAACGGGATGCATGG	60.010	55	0.010	CGGCTTGTTAAGTCTGGTCC	59.306	55	0.694	133	0.704	A	10
22206	CTGCCTGATAACCCTTCTCAC	58.848	52.381	2.152	TGCAACAGAAACAGGAAGACAG	59.816	45.455	2.184	102	4.336	A	11
22243	GAAGGCCCACAGACGTCAAC	61.976	60	1.976	GGCCCTCATTGTTACTTGCG	60.293	55	0.293	100	2.268	AC	18
22324	CGGTTGAAGAATGCGATTTCC	58.952	47.619	2.048	AGAGGGAATCAGAGTGGCTTC	59.937	52.381	1.063	118	3.110	A	14
22361	AACTTTCACTTCTTCGTTGCTG	58.470	40.909	3.530	CTTTCTGCCCGGTATCTGG	58.361	57.895	2.639	129	6.169	C	23
22396	GTCACTGTCCACGCCATAAAG	60.013	52.381	1.013	CGGAAATAATGCTGCCGGG	60.084	57.895	1.084	125	2.098	C	13
22397	ACTTCCCGTATGAGGAAACG	58.083	50	1.917	TGGATTTATTGGGTGCTGCTG	59.664	47.619	1.336	122	3.252	A	10
22461	GAAGCAAGATACAGCCAGGC	59.728	55	0.272	GGGTCAGAGAGTAGCAGGC	59.932	63.158	1.068	111	1.340	AAT	10
22471	GAGGTCCACGTCACGGTG	60.779	66.667	2.779	ACACATCCAAACTCCAACCC	58.771	50	1.229	149	4.008	C	17
22479	GCGGATCATGTGCAGTCTTTG	60.944	52.381	1.944	ACAATAACACTGCCGAGGAG	58.366	50	1.634	104	3.578	C	15
22628	CGCTGGCCATGGATTAAGAG	59.515	55	0.485	GCTGGTTGGTGTTTGTGTTC	58.819	50	1.181	141	1.666	A	12
22838	ACGCCATGATTGTACGGTATC	58.999	47.619	2.001	GGTATCCATCTGCCCGTTTG	59.442	55	0.558	100	2.559	A	10
22974	ACATAAGCGGGCTGTTTGTC	59.585	50	0.415	GGCCTGTAATGGGACTGC	58.503	61.111	3.497	122	3.912	A	11
22989	CCCAAATCGGCCCTAGGTC	60.611	63.158	1.611	AGCTGATCACCCGTTCAGAG	60.223	55	0.223	122	1.834	AC	19
23065	GCCAATAAGCCAACGGAAGG	60.294	55	0.294	ACGAGTTTCAGCAGTTTCTTTC	58.211	40.909	3.789	104	4.082	A	14
23234	CTCCGCATAACCCTAATGTTCG	59.950	50	2.050	ACCCTGCATAACACTCAACAG	58.979	47.619	2.021	146	4.070	A	11
23239	GTGTGCCTGCGGTTGTAAC	60.449	57.895	1.449	AGCACACTATACCAGCCAGC	60.582	55	0.582	101	2.032	AC	8
23619	GGCCATCCACACTTACCTG	58.577	57.895	2.423	TGGGTCCTGCAGAATAACGG	60.511	55	0.511	118	2.935	A	10
23693	TTATCGGAGCAGGACGTCTC	59.727	55	0.273	GCGACGGTCATCAGTTAAGC	60.084	55	0.084	125	0.357	AG	15
23959	GGAAACGGCAAGAATCACGG	60.570	55	0.570	TGTATCGAAGCGGAAGAAACG	59.483	47.619	1.517	103	2.087	A	10
24035	GGCAAACATCAAACCACTCG	58.686	50	1.314	AGGAAGGACTCTGCTACATGG	59.659	52.381	1.341	145	2.655	AACT	15
24229	CACATCAGAGAAGACTTCCACC	59.166	50	2.834	CCTCACCACCAACAAACCC	59.329	57.895	1.671	145	4.506	C	13
24438	CTCTCTCGTTCAGTCCGCC	60.597	63.158	1.597	ACTGTATGGGAGAGTCGTCG	59.37	55	0.630	114	2.226	AT	8
24928	AGCCGGGTCATGCACATAC	60.907	57.895	1.907	TGTTCCAGCCACGAAACATG	59.798	50	0.202	128	2.109	C	15
25219	ACCAGAACAATCCAGTCCATG	58.691	47.619	2.309	GGTTCTGACGGGCAAATCC	59.564	57.895	1.436	112	3.745	C	10
25219	GAACAATCCAGTCCATGCCC	59.651	55	0.349	GGTTCTGACGGGCAAATCC	59.564	57.895	1.436	108	1.786	C	10
25513	TGGTTTGTGGAATTCGTCTTTG	58.455	40.909	3.545	AATATTTAGCGTGCCACCGC	60.082	50	0.082	135	3.627	AAC	10
25625	GGCGGTGGTGTGAGTCAG	61.094	66.667	3.094	CAACACACCGTATTAGCACCC	60.013	52.381	1.013	112	4.107	C	13
25656	GATGTGATCGGCAAAGGGTG	60.011	55	0.011	TCAGTCCAACAAGTTTCGATCC	59.361	45.455	2.639	103	2.650	ATC	14
25657	TTCACATGTTTCTGGCTGGG	59.142	50	0.858	TTACCCACCTTTCCTCCTGC	60.078	55	0.078	101	0.936	C	18
25686	AGTGTTGTAATTTCCGTTGCG	58.479	42.857	2.521	TCCTTTCTCCATCTCCTGCC	59.566	55	0.434	131	2.956	A	10
25811	AAACATCCGACTGCAGACAC	59.234	50	0.766	CGTTTCAAATCGACACGCTTC	59.5	47.619	1.500	109	2.267	ACAG	6
25935	GAACTGGGAAGAGGCGATTTG	60.012	52.381	1.012	GACAGCAGTTTCTCTTCGAGG	59.411	52.381	1.589	139	2.601	A	10
26082	CCTGGCCTACTAGAGCTGTC	59.722	60	0.278	TGCCGATAGTTAAGTGCATACG	59.372	45.455	2.628	100	2.906	C	11
26151	CGACCGATTAACCAACCAACG	60.610	52.381	1.610	TCCCAAGGAAGACTCTGCTTC	60.146	52.381	1.146	107	2.756	AACC	12
26181	TGCCACACAGTTTCCCAC	58.497	55.556	3.503	GCCGCTTCAACAATCGTCTC	60.635	55	0.635	138	4.137	AT	11
26247	GGCCATTACCAACAGCGC	60.241	61.111	2.241	CTCCCACTTTGCTCTTCTTCC	59.328	52.381	1.672	100	3.914	C	19
26323	AGTACTTGGGCTGATTGGTG	58.267	50	1.733	ACAATCGTGACATGTTCTGGC	59.945	47.619	1.055	102	2.789	AT	8
26385	GGTGGTGGGCTCTTTCAATG	59.866	55	0.134	GAAGGGCTCTGCTCCACG	60.864	66.667	2.864	139	2.999	AACC	9
26531	ATATCCATGGTCAATTCCGGG	58.333	47.619	2.667	TTCTCGTTGTGGGCTCCG	60.398	61.111	2.398	129	5.065	C	10
26722	CGACGGTATTCATCGGGAG	58.256	57.895	2.744	GACCCACGATCCGCTCTTC	60.965	63.158	1.965	103	4.709	AG	8
26873	TATGTGGTTGGTGGATGGCC	60.807	55	0.807	ACCCGAGCAAATTTGTGGTG	60.081	50	0.081	127	0.888	A	13
26935	CTTACGCTCGACCGAAGAAC	59.467	55	0.533	CGGCAACTACTCGGACTTAC	58.829	55	1.171	115	1.703	AAAC	14
26937	TCAGTGTTTGATGGAGACGTTG	59.625	45.455	2.375	GGGCTCTGTGTCTCAACCC	60.758	63.158	1.758	140	4.133	C	17
27029	CGTATCACTCCGACTGCCC	60.672	63.158	1.672	CTTTCCGCCCAACACCAAC	60.38	57.895	1.380	143	3.051	C	12
27215	GGCAACCTAACCTATGACTGG	58.843	52.381	2.157	CACTTCAGGCGTGGTGTTG	60.085	57.895	1.085	102	3.242	AC	15
27276	TCGGAACCTTAGATGCAAGTC	58.510	47.619	2.490	GTCAGTGCCACAACCAACAG	60.363	55	0.363	140	2.853	AC	22
27467	TCGTCAGTGTGGTGTCATTTG	59.541	47.619	1.459	TTCACAATCTCGCACTCACG	59.317	50	0.683	117	2.142	AC	31
27505	GGTCTGTTATCTCGAAGGAAGG	58.710	50	3.290	CCTACGTCCTTCCTTCCCTC	59.648	60	0.352	133	3.642	AAGG	10
27548	GCTGCTGTACTGATGGTTTGG	60.282	52.381	1.282	CAGTTGAGCGGAAATGGACG	60.291	55	0.291	121	1.573	A	13
27752	ATCCCTAACTACACAGAAACGG	58.299	45.455	3.701	TGTTAGCTTGTCAAGAAGGCC	59.257	47.619	1.743	135	5.444	AACT	19
27993	TGAGGCTGGGATTCGATAGG	59.425	55	0.575	GAACACTATGCAGATTTGTCGC	59.065	45.455	2.935	122	3.509	AT	9
27999	TACATCTGCTGGCTTTCTGG	58.351	50	1.649	TAGAAATGTCGCCGGTCACC	60.859	55	0.859	125	2.509	AC	19
28507	GTAGCGACCGTGAATCAGG	58.771	57.895	2.229	CGCGACCTATCCAGAAATCC	58.957	55	1.043	141	3.272	A	10
28520	GCAAGCCCGAACACTACATC	60.013	55	0.013	TGCGTTCAGATCACACTCCG	61.132	55	1.132	104	1.144	C	14
28772	ACGTTTAGGAAGAAGACGGG	58.013	50	1.987	CCAACCCTTCCTGTTAAGCC	59.215	55	0.785	107	2.772	C	11
28781	ACGAAACAGCCTACAAAGCC	59.514	50	0.486	GTCCCTATCCTGAGCCAGC	60.006	63.158	1.006	110	1.492	C	13
28994	GAAGGACGTGATTTGGAGCAG	60.013	52.381	1.013	GCATGGAATTAGCAGGTTTGTG	59.239	45.455	2.761	137	3.774	A	17
29167	TCTCGGAGGGTTGTTGTGC	60.681	57.895	1.681	TGTTCCGTGCAGTAAACCAG	59.16	50	0.840	123	2.522	ATC	12
29179	AATATTTCATTCAGTAGCGCGC	58.610	40.909	3.390	TTGTGAAATTTGGTCGATTGGG	58.51	40.909	3.490	100	6.880	AC	13
29313	GGATGTTCTCAACGGCGTATG	60.148	52.381	1.148	TGCACGGATAATGGGAATACAC	59.291	45.455	2.709	127	3.856	AAAT	6
29516	CGCGAGCTGATCACTTGTTC	60.359	55	0.359	AGGGCGCCTAAATGTTGAGG	61.159	55	1.159	110	1.518	AC	11
30152	CCAACCAGCCAACCAGTC	58.981	61.111	3.019	TAGGTTGGCTGTGGGAAGAC	60.079	55	0.079	144	3.097	AGAT	19
30175	CAGCTATGGATTGGCACGTC	59.802	55	0.198	CGCTTACGCCGGAAATTTATC	58.831	47.619	2.169	114	2.367	C	15
30242	CGCCTACACTTACCACCATC	58.810	55	1.190	CGTCCAGTGTGTAGCCAGG	60.823	63.158	1.823	136	3.014	ACT	16
30259	GAAACTCGGCCCATTACAGC	60.012	55	0.012	TATCTGTCGCGGCACTTGAC	61.2	55	1.200	105	1.212	AAAT	8
30308	TGCGCCTAATACTTCACAGC	59.093	50	0.907	AGAGTTCCTGTTACACCAGTG	58.01	47.619	2.990	148	3.897	ATC	9
30681	AACATCCCTCCTTCCCTTCC	59.484	55	0.516	CCACTGACTGATCACCCGG	60.531	63.158	1.531	131	2.047	C	15
30682	TCTCCGCCCTTAGTTAGCTC	59.360	55	0.640	CGTTTGATCTGCGACGCG	60.681	61.111	2.681	103	3.321	AACC	7
30772	TGCCAACCTACCTGCCTG	60.003	61.111	2.003	TAGGTTGGTTGGCAGGCAG	60.689	57.895	1.689	110	3.692	AGGC	7
30818	TTGTTACGGGAAAGCTGTGC	59.799	50	0.201	TTGCAGCAACATACACAGGC	60.152	50	0.152	107	0.353	AG	10
30935	CCCACTATCACAGGCATGAC	58.795	55	1.205	CCCTCTTCAACTCAGTGGCC	61.083	60	1.083	107	2.289	C	13
30938	ACACATTCACAGAGCAAATTCC	58.250	40.909	3.750	TGAGCCCAGGTGAAGACTC	59.396	57.895	1.604	101	5.355	AC	8
30971	TTGCAGAAGGAACAAGGTACC	58.906	47.619	2.094	CGTCGCGAATATGAAGGACG	59.949	55	0.051	100	2.144	C	12
31043	AGCGCAGTTATACCAGTGTG	58.736	50	1.264	ACCAGATTACACGACGTCAC	58.397	50	1.603	103	2.867	C	10
31111	TGCCAAATTGAGACACGTGG	59.798	50	0.202	AGCGTAGGGAAAGTGATGTTTG	59.686	45.455	2.314	126	2.515	ACAG	8
31142	TGAGGCTGCCATATACTCGG	59.792	55	0.208	ACGGACGGACAGACATAACG	60.572	55	0.572	114	0.780	A	10
31291	CTTGGAATGCTGGTCGAGAC	59.379	55	0.621	GGAAACAAGCAAGGAACGAAAG	59.375	45.455	2.625	138	3.246	AAAG	8
31469	CAGGCGCAATCACTTCGAG	60.014	57.895	1.014	TGGAGTTGTCACGACCGATC	60.505	55	0.505	132	1.518	ACTC	19
31776	CACTCGTGTCGTTAAGCCTG	59.670	55	0.330	GAGGCTGATCGTCGAGGAG	60.085	63.158	1.085	136	1.415	AAG	9
31832	AATCAAGGCGGATGACAAGC	59.654	50	0.346	TTATGGCGTCGTTAAGTGAAAC	58.094	40.909	3.906	139	4.252	AG	19
31916	TGCTGTGTCCTTAGTAGTGGG	59.870	52.381	1.130	CTGCAGTCTAATGATCAGTCCC	59.034	50	2.966	101	4.096	C	13
32905	GGAGAGGATGGTGAGTGGAC	59.935	60	0.065	TCTAAGCACTCTCCGACCAC	59.58	55	0.420	109	0.484	AG	10
33016	AACAGCACAGAAGACATGGC	59.511	50	0.489	TGAGAAGTGCAAACCTGAGC	59.155	50	0.845	124	1.334	A	11
33169	AGACCTGTTAGCTTCTCGGG	59.575	55	0.425	CTCCAGGTGTTGAGCCATTG	59.582	55	0.418	138	0.843	AACT	20
33296	CTACACGGCGACATTGGAAG	59.736	55	0.264	CCGTAATATAATTCTGCGCTGG	58.16	45.455	3.840	143	4.104	C	16
33399	CTACACGGCGACATTGGAAG	59.736	55	0.264	TGCGCTGGTTGTATTTAATCAC	58.401	40.909	3.599	129	3.863	C	15
33488	CAACTGCTTACGAGGCCTC	58.980	57.895	2.020	TGACTGCTCACGTCATCTGG	60.506	55	0.506	108	2.526	A	10
33541	GCTGTGACACTGTACACCC	58.826	57.895	2.174	CCACCACTACCGCTAACATG	59.093	55	0.907	130	3.081	ATC	9
33628	TTTGGGCTTGATACTGCGG	58.883	52.632	2.117	CGTACGGGTGTTAGGCATTG	59.734	55	0.266	114	2.383	A	11
33671	AGAGTGATCGTGAAGCCTCG	60.293	55	0.293	GTAGCCTTAATATCCCTCCACC	58.217	50	3.783	101	4.076	C	12
33792	TACGCCAACTAAGTGCACTG	58.954	50	1.046	CCGGTGCTTTCTAGTGATACTG	59.304	50	2.696	146	3.742	AAC	9
33876	ACAGGGTAGTAGGTGTAGCG	59.000	55	1.000	CAGCCACAGAGCCCGTTC	61.481	66.667	3.481	123	4.481	C	12
34069	ATTCGTTAAGTGGAGTCCTACC	58.034	45.455	3.966	CAGCCCACTTCCTGCCTAG	60.534	63.158	1.534	118	5.501	AC	25
34379	ACAGACAGACAGCGAGCC	60.086	61.111	2.086	GGTTGGTTGGCTGTCTGG	58.981	61.111	3.019	134	5.105	AGCC	9
34473	CGGAAAGCGACATTTATCTCAG	58.297	45.455	3.703	AGGCAGGCAGACAAAGACAG	61.013	55	1.013	120	4.716	AGGC	6
34519	CTCTACCGCCGCTCTCATAC	60.502	60	0.502	ACAGAACAGAATGGGCATCTG	59.045	47.619	1.955	107	2.456	A	10
34665	GGAAGACATAGACGAAGACAGG	58.719	50	3.281	ACCGCCTTCACAACAGCC	61.341	61.111	3.341	128	6.622	C	10
35092	GGTGCAGTTAGTTGTGAGGG	59.227	55	0.773	TTCTCCGGTTCTGCTCACTG	60.437	55	0.437	107	1.209	C	11
35437	GTGCTGCAAGAGGGTTTATTG	58.527	47.619	2.473	ACCCTAAACCCGTGACACC	60.005	57.895	1.005	104	3.478	C	14
35482	TCTGGACGAGTGATCAGCC	59.558	57.895	1.442	AGACTGCGGGTTCTAATCCC	59.934	55	0.066	115	1.508	AG	9
35545	CGTAGGCAGAGTTTCATCGG	59.176	55	0.824	ATTTAGGGTCAATGGTGCGC	59.652	50	0.348	131	1.172	C	19
36028	ATCGAGAAGCACGCCACTC	60.893	57.895	1.893	TCTCACTCCACCTGTCTTTGG	60.077	52.381	1.077	136	2.970	A	13
36079	CAAATTAGCCTTTACTCCTCGC	58.211	45.455	3.789	CTGTGCCTCTCCTTCACTTC	58.658	55	1.342	126	5.130	AATT	7
36099	TATGTCGCGCTGCCCAAC	61.551	61.111	3.551	ATAAGACCCTTCCTCTGCGC	60.295	55	0.295	150	3.847	A	14
36135	AGTAGGTAGAAGAGGGAAGGAC	58.528	50	3.472	TGTGGCCTCTGAGTCGTTAC	60.152	55	0.152	134	3.623	AAAG	18
36285	TGGTCTGTTTGTACGTCACTTG	59.562	45.455	2.438	CATCATGGCCCGTACACAATC	60.147	52.381	1.147	135	3.585	AC	19
36465	ACAGACCCACAATATCCCGG	59.933	55	0.067	GCTGTTTGGTCCAGACAAGC	60.434	55	0.434	113	0.501	A	10
36601	GTATCAACAGTCGTGAAAGCAG	58.427	45.455	3.573	ATTTGCATTGAATGTCTGACGC	59.244	40.909	2.756	100	6.329	A	10
36807	AGATAGCTCCTGACGTTACGG	59.808	52.381	1.192	CACTTCTGGATTGTGACGCC	59.942	55	0.058	105	1.250	C	14
37093	GTGATAATGGGAGTGGCAGC	59.440	55	0.560	TCTAGTCTTGCCGCTACTGC	60.294	55	0.294	129	0.854	ACT	9
37155	ATTTCATTCCACCGGTGCTC	59.293	50	0.707	GGCCGACTGTCTAGAAATCG	58.896	55	1.104	110	1.812	A	12
37303	ACAGGACGGACTAAGTGACC	59.505	55	0.495	CAGAAACTTAGTCGAGCTGTCC	59.502	50	2.498	106	2.993	ACCG	12
37530	CGCGTAATGTATTCGACCGAG	60.018	52.381	1.018	TAATTACAAAGTGGCGGCCC	59.292	50	0.708	106	1.727	C	16
37783	CCCTGTCGCCACTAATCTG	58.373	57.895	2.627	ACAGAGTTGCCAGTTGTGTG	59.369	50	0.631	150	3.258	A	10
37841	TCTTTACTGTGGCGGGACTG	60.438	55	0.438	GGTCTGAGTTCTCCAGTACCC	59.94	57.143	1.060	125	1.498	A	11
38113	AATCTCCTACCGCTGCCAAG	60.582	55	0.582	CTGTGTAGATGTCAGCACGG	59.104	55	0.896	129	1.478	A	10
38236	AATGGGCAAGCATGTTCAAC	58.293	45	1.707	TCCGCACCAACTACGATCAC	60.855	55	0.855	144	2.563	AC	32
38380	AGGGCACTAATTTGTACGCTC	59.127	47.619	1.873	CTACAAGCTGTTCGGAAATTCC	58.406	45.455	3.594	105	5.467	AT	9
38660	AATGGGCAAGCATGTTCAAC	58.293	45	1.707	CCGCTCGAAGTTCTTGCAC	60.231	57.895	1.231	143	2.938	AC	23
38801	TTATTGTTGGCGCAGATTCTTC	58.397	40.909	3.603	AAACAGACGCCGGAAATCAG	59.588	50	0.412	101	4.014	AAG	8
38823	AAAGCAGCACACAAGGGAAC	60.009	50	0.009	CAGCAGAATCGAAACATGTAGG	58.219	45.455	3.781	135	3.790	A	10
38911	TGTCTTCCCTTCTCCAATGC	58.267	50	1.733	AGGAAGGAAGCACGGACG	60.086	61.111	2.086	110	3.819	AAGG	7
39408	ATGAAGGTGGTAAGGTTGTCAG	58.751	45.455	3.249	GGGTCGACTCAGCCTCTC	59.538	66.667	2.462	100	5.711	C	10
39621	GAGCATCCAAGTATTCCGGG	58.868	55	1.132	GTCAGTTTCATTCCACCGGC	60.223	55	0.223	140	1.354	A	11
39676	GTTGTTGGGAAGTCACAGGG	59.437	55	0.563	AAACCATTCTCCGCCTTCAC	59.221	50	0.779	114	1.342	A	12
40274	AGCTGTACCTCACTTGTCCTG	60.146	52.381	1.146	TATGCCGCCGTTATGTTTCC	59.446	50	0.554	126	1.701	A	11
40345	ACGGAACCACATGCTCATTG	59.584	50	0.416	CCTGTGTTCATGACTGGGTC	58.939	55	1.061	123	1.477	A	10
40571	GTTTCTGCATATGTGGTTCTCC	58.132	45.455	3.868	AATAACAACCGCGTTTCTGAAG	58.605	40.909	3.395	116	7.263	A	11
40612	TCACGCTCTCCAGATGACAG	59.939	55	0.061	GACAGCTTTAACCCACGCC	59.864	57.895	1.136	147	1.198	C	10
40966	GATTTCCCTCGCCCAATTCG	60.082	55	0.082	CAAAGCGCAGTCACTACACC	60.222	55	0.222	110	0.304	A	10
40966	ACGCGCCTTAGTGTTACG	58.562	55.556	3.438	CTGTACATTGCCGGCGTG	59.936	61.111	2.064	113	5.502	AAT	8
41101	GCCTCTCCAACGAACTGATC	59.097	55	0.903	TTTGTTTAGTCTATTACGCGCG	58.247	40.909	3.753	105	4.656	CG	9
41153	CTTGTACAGGAGGCTGGGTG	60.797	60	0.797	ATTAATACAGCGCCCAACCC	59.072	50	0.928	101	1.725	C	10
41223	GCGTGTCAGCCATCCGATAG	61.681	60	1.681	GGTAACTAGAAGAGGCAGCAC	58.858	52.381	2.142	118	3.822	AG	8
41297	TACTACACGGCCTCACATCG	60.011	55	0.011	ACTTGTATACGAGACTTGGCG	58.6	47.619	2.400	102	2.411	AAT	10
41310	TCACTAAGGGATGGACGGTC	59.283	55	0.717	GGCCGGTTTATCCCAGGG	60.563	66.667	2.563	143	3.280	C	11
41448	TTTGTAGTCATCTGGCTCATCC	58.625	45.455	3.375	GCCGGACCGAGGAATGTTAG	61.278	60	1.278	100	4.652	AC	8
41895	GTACCGCGCTGTAAACACTC	60.016	55	0.016	GTGCCCACATTGCGTTTATG	59.108	50	0.892	127	0.908	A	11
41950	CAGTCAGTCAGCCAGCCG	61.168	66.667	3.168	TCATGTGTTGCTCCATCCATC	59.116	47.619	1.884	115	5.051	ACTG	7
42119	GCTATCGCGATGTTCCAAAG	58.076	50	1.924	TTTGCAGAGACCGTGAGC	58.373	55.556	3.627	134	5.551	AC	27
42195	GGAATGCGTAATACAGTGCAG	58.147	47.619	2.853	ACGCGGACAACCTTAACAAG	59.52	50	0.480	104	3.333	AAT	10
42695	AAGCACCAGTAGATCAAAGAGC	59.160	45.455	2.840	GCTCATGTGTGCGTAACGTTC	61.191	52.381	2.191	100	5.031	A	11
42853	CTAGCCCGCCTCACTGTAC	60.306	63.158	1.306	TGTGTTGTCAAAGGTAGCGG	59.16	50	0.840	112	2.146	AC	12
42907	GGTGAGAGGGTAGCAGCTAG	59.722	60	0.278	TGACCACACATCTCTTTCCAG	58.356	47.619	2.644	136	2.922	C	12
42938	CCAGGCCTGTAATGGGATTTC	59.457	52.381	1.543	CCCAAGCACGGCGATTATATAC	60.078	50	2.078	141	3.622	A	16
43313	AAGGCGATCTTCACAACACC	59.227	50	0.773	ACCCAATCACAAAGCATCACC	59.871	47.619	1.129	130	1.901	A	13
43361	CCAAGGCATAAAGAGAACACAC	58.329	45.455	3.671	TGACCTCACTCCACTGTATGC	60.215	52.381	1.215	135	4.886	AC	15
43705	TGAATGCGGTGGAATGCTG	59.563	52.632	1.437	CACCGACTGTTACCACCAAC	59.52	55	0.480	106	1.917	C	12
43926	TGGTGGTTTGATGTGTAGGAG	58.349	47.619	2.651	TTCTGCTCTGCCCATCTTTG	58.929	50	1.071	114	3.722	C	12
44004	TGCGCCTGATCACACTTAATG	59.742	47.619	1.258	CTCCTTGAGTGGTGTGAGC	58.52	57.895	2.480	102	3.738	AC	29
44089	TGGTAGACACGGGTAAAGTTC	58.093	47.619	2.907	ATCTGTATCACACTCACCCAAG	58.291	45.455	3.709	104	6.616	A	10
44095	TGTTACCAACGCCTTCTTCC	58.867	50	1.133	AGTTTGCAACAGAAGCCGAC	60.082	50	0.082	100	1.215	A	10
44321	AGATGGGAAGATGGATGGACAG	60.074	50	2.074	GTCCATCCGTCTGTTTGTCC	59.306	55	0.694	104	2.768	ACAG	14
44568	TGTGTTGGTGTCGGTTCGG	61.265	57.895	2.265	CGCTGGTGTCTGAAGAATCC	59.379	55	0.621	103	2.886	C	10
44679	CATTCTCAGGGTACGGGAGC	60.650	60	0.650	TAGGTTAGGAGAAGGGCCAC	58.901	55	1.099	101	1.750	A	12
44767	AAAGTTTGCAGATCACACACG	58.405	42.857	2.595	GCCTCTGCGACGGACTAG	60.318	66.667	2.318	104	4.913	AC	17
44965	CGTCCAGAGAAGTCCTACCG	60.011	60	0.011	TGTTGCACCTGATCACACTC	58.869	50	1.131	105	1.142	AC	30
45030	TGTCCTGATTCTCCTCTACTGC	59.745	50	2.255	TGCGAAACATCTGCCTCTTTC	59.945	47.619	1.055	138	3.310	AAT	12
45500	CACCCAGCCTCGTATTCAAC	59.376	55	0.624	TTGACTTCGGCACTAGAGGG	59.864	55	0.136	110	0.760	C	10
45717	CGGAGTCGGAAGGTTTATGC	59.452	55	0.548	GGCCTAGGTCCTGTGATGAG	60.007	60	0.007	123	0.555	A	10
45718	TTCTCTGACGTCATGACACTG	58.460	47.619	2.540	CAGGCGTATCTGCAAAGCTG	60.361	55	0.361	104	2.901	A	10
45943	GGTGCTCAATAACACCGGAC	59.660	55	0.340	TAGGCTGTCGAGTCGTTACG	60.013	55	0.013	126	0.354	ACT	13
45953	ACAACCTCGACACCTGCTATG	60.827	52.381	1.827	AATGCCATCCCGTTGTGTTG	60.152	50	0.152	100	1.979	AAACG	6
45979	ATATGCTCGCGATCACTGTG	58.963	50	1.037	GGAACCATGCTTCTGATCCC	59.074	55	0.926	107	1.964	A	12
46010	CGGAGTCGGAAGGTTTATGC	59.452	55	0.548	GGCCTAGGTCCTGTGAAGAG	59.935	60	0.065	123	0.612	A	10
46114	TGATCTGGAAGAACATCGAACG	59.240	45.455	2.760	CGGACGTTAAACACTGGGTC	59.595	55	0.405	124	3.165	A	10
46201	AAGGAATGTGAGGGCTTGAG	58.262	50	1.738	CGCTCCTAATAACACGGTCC	58.891	55	1.109	103	2.848	C	10
46207	GGTTCTCTCCTTTGCCACAC	59.512	55	0.488	TGTTCCGGGTTTGGTTTGTC	59.651	50	0.349	149	0.836	A	25
46310	GTATCTGCCGTTTGTAGCGC	60.428	55	0.428	TTGTCATCGTCTTTGCGCG	60.23	52.632	1.230	121	1.658	C	20
46532	GGCCGCCTCATTGTCGAG	61.624	66.667	3.624	GGGCTGATCACTCGTCCAG	60.603	63.158	1.603	108	5.227	AC	23
46635	TGGCAAGATGAAGTTTGGCG	60.152	50	0.152	GGAGCAAAGGGTTTCGACC	59.489	57.895	1.511	104	1.663	C	12
46824	AAATGCACTGCCTCTCACTG	59.223	50	0.777	CCATCACTACACACTCAACGTC	59.76	50	2.240	102	3.017	C	13
47293	ACGCGTCCTTTGAAATGACC	59.871	50	0.129	ACTACCTTTATCTCCGCACAC	58.235	47.619	2.765	102	2.894	ACGC	7
47318	CCTTCTTTAGCCTTGGTGCG	59.941	55	0.059	ACCCACCTAGCCTCCTGTAC	61.105	60	1.105	113	1.164	C	10
47518	GAACAAATTCCCAACCGCGC	61.743	55	1.743	ACGGATCTCAGAACAAACAGC	59.335	47.619	1.665	102	3.408	A	10
47564	TTAGGGCGTACAGAACAGGG	59.863	55	0.137	TCCGCAGTATTTGTTGGTGC	59.869	50	0.131	123	0.267	CG	9
47630	CCCTATCCCAATTGCTAACCG	59.257	52.381	1.743	AGCAGACGACGAGAAGTGAC	60.502	55	0.502	144	2.245	ACT	14
47705	CATAACTTGCCAGGACTGACAG	59.753	50	2.247	GATACTTTCTCACTCACCGACG	59.316	50	2.684	142	4.931	AAAT	7
48384	GACATGTTTCGTCTTCAGAGGG	59.756	50	2.244	ACTCTCATGTTTCACTGCACG	59.61	47.619	1.390	105	3.634	A	12
48429	GTGTGTATGATCGCGGAACC	59.806	55	0.194	TGTACCAACTGAGCTACCCG	59.865	55	0.135	108	0.329	A	11
48617	TCAATTTCGTTCCACCGGTG	59.516	50	0.484	CCTTGAGGCTTCTGGTGCAG	61.716	60	1.716	105	2.200	ATC	8
48642	TGTCTGCAGCCTCTCTTGAC	60.437	55	0.437	GTTGATGGCTAAGAGTCGCAG	59.814	52.381	1.186	112	1.624	AG	8
48695	AGAGGATGATTGTTGCCTTCG	59.122	47.619	1.878	GAATTCACTGGGTAGGGCC	58.26	57.895	2.740	131	4.617	AC	30
48741	CCCGGTGCTCCATTACTAGG	60.367	60	0.367	CAGACGCTACGGACGCAC	61.588	66.667	3.588	115	3.954	ATC	8
48936	GTTGCCCGCCGTCTTTAC	59.859	61.111	2.141	TGTTTGTCTACTGTCGTTGCC	59.542	47.619	1.458	100	3.599	C	25
49002	CCCGATGGAAGACTAGCAAC	58.806	55	1.194	ACCAACTAAATGCGCCGTAC	59.661	50	0.339	100	1.533	AAT	12
49111	CCACAAATTCATGCTGACCC	58.089	50	1.911	CCCTGCCTATTATCCTGTCATG	58.822	50	3.178	138	5.090	A	11
49119	TGGGACATTACGCAGCGG	60.865	61.111	2.865	ATTGTGTCGCGTTTCTTCCC	59.871	50	0.129	137	2.994	C	10
49196	TCTCGACCACACATTCCCTG	60.152	55	0.152	GGCAGGCGTCATACACAGAG	61.552	60	1.552	109	1.704	A	10
49412	ACTGTTGTTGACGTCGGC	59.012	55.556	2.988	CCTCATCCACTACCACATCCC	60.353	57.143	1.353	128	4.342	ACC	14
49477	GCTGTGTCCTCAAACTGGTG	59.799	55	0.201	GCACAAACAGCCGTAACG	58.203	55.556	3.797	138	3.997	AAT	10
49717	GTACGGGCGTCTTTGTTGTG	60.498	55	0.498	CAATGGATGTGTGGGCCC	59.131	61.111	2.869	111	3.367	C	15
49980	CATCCAGCGTACCACACTTC	59.381	55	0.619	GTCGACCCAGCACAGTTTG	59.792	57.895	1.208	115	1.827	C	10
50211	CGCAGCTTAGAGGGAACATTG	60.080	52.381	1.080	CACTAAGGCCCGTGGATTTG	59.655	55	0.345	106	1.425	C	10
50341	ATTCGTACCTGCGCCCTC	60.242	61.111	2.242	GCCACGCGACAGATCTTTAC	60.084	55	0.084	142	2.326	A	10
50850	ACACCTGTAACTGCCACTAAC	58.639	47.619	2.361	AAGTCACCAGCCCTAGACTG	59.497	55	0.503	104	2.864	A	12
50852	GGGTCATTCGAATACCAGCAC	59.810	52.381	1.190	TTGTTGTCATGTGGCTTGCG	60.713	50	0.713	110	1.903	AC	15
50983	TTTATGAGTTGCAGAGCCGC	59.659	50	0.341	TATAACACACTTGGCGACGC	59.385	50	0.615	133	0.956	ATC	9
51003	TTGTGAAATCGTTACAGCTGC	58.206	42.857	2.794	ATAGAGCTCGGCCATGGAAC	60.367	55	0.367	115	3.161	AC	22
51319	ACACCATTTATTTGTATGCGGC	58.715	40.909	3.285	GCGTGTGGACAGTAATCAGC	60.014	55	0.014	103	3.298	A	11
51329	GAACTCGGATACAGGCTGCG	61.611	60	1.611	TTGCAAGACATATTTACGGGCC	60.077	45.455	2.077	100	3.688	A	10
51621	ACGTGCCATATATTCTGTCGG	58.725	47.619	2.275	TGGAGTGCTGATGATTACGAC	58.587	47.619	2.413	124	4.688	ATC	14
51868	TCATCCTCCTTAACTACGTGGG	59.744	50	2.256	GGTTCTGCCTGTGTTACTGC	59.87	55	0.130	104	2.385	A	11
51964	GACGTGTGGAGATCTGCCTC	60.925	60	0.925	CTACACGGCGACACAACG	59.565	61.111	2.435	140	3.360	C	14
52063	GGAACGTCGCCAGTAGTTAC	59.111	55	0.889	TGCGGCTGAATCAATGACAC	59.941	50	0.059	120	0.948	C	17
52240	GTCCCTATCCTGAGCCAGC	60.006	63.158	1.006	GAGATCTGAGGGAAGGCGG	60.007	63.158	1.007	127	2.014	C	10
52381	TGAAGAGTGCAGCTGTCAAATG	60.207	45.455	2.207	TGGCGAATAAAGTTGCTCAGC	60.282	47.619	1.282	103	3.488	C	11
52558	TGCTGATTATGTGCGGCAAG	60.011	50	0.011	GCCTCCAAGCCAACGTTC	59.778	61.111	2.222	123	2.234	C	15
52798	TGTCGTTATAACCGCGTTCG	59.467	50	0.533	GCCTGTAATGGGACTGCTTTAC	60.077	50	2.077	106	2.610	A	10
53090	TCAATTGTCCCAAATCAGCAGG	59.944	45.455	2.056	ACTGAACTACTTTACTGTGCCC	58.762	45.455	3.238	136	5.295	A	14
53100	AAAGGATGGACTGTGGAAAGG	58.613	47.619	2.387	TTCTGTGGTTCGTTTGTTGC	58.186	45	1.814	101	4.201	C	11
53191	ATTGTTGCGCCTGATCACAC	60.223	50	0.223	CAGTGGAGTCCGAGCGAG	60.241	66.667	2.241	110	2.464	AC	31
53276	GCACACTGGCGTATAATGGC	60.431	55	0.431	AAATTTACCGCCGTCCTCAC	59.302	50	0.698	124	1.129	C	11
53612	ACTTGATTTGAGGCATGCGG	59.939	50	0.061	AGCGTTGACTGCCATTACTG	59.304	50	0.696	130	0.757	A	12
53762	CTGTCCAGGCCTGTGATGG	60.835	63.158	1.835	GGCCTTCCACAAACAAGCTC	60.435	55	0.435	109	2.270	AAAG	8
53849	TTCCTCGGCGTCAGAAGAAG	60.505	55	0.505	CGTAGCCGCACATGACTTTC	60.359	55	0.359	102	0.865	A	11
54290	TGATCAACTTCAAACCGCGG	59.871	50	0.129	AAATATCCAGACCGTCCTTGG	58.207	47.619	2.793	100	2.922	C	10
54351	CTAGGCCGCCACATCCTG	60.634	66.667	2.634	CGTGTGTTGTGTAGGCAGC	60.158	57.895	1.158	141	3.793	AC	17
54455	ACGATTTGGTGTCACTCCG	58.529	52.632	2.471	GTCGGATCGGATTGTGCATC	59.874	55	0.126	117	2.597	A	11
54663	TCATATCTCTTGTTGTGAGCCC	58.625	45.455	3.375	ACTCGACTTGGCTGGAAATC	58.652	50	1.348	107	4.722	A	10
54802	TGCGCCTAATACTTCACAGC	59.093	50	0.907	TCAGTCTTGCACGGTGTTAG	58.597	50	1.403	103	2.310	ATC	15
54806	GGTTGTCCCATGTCTAACAATG	58.056	45.455	3.944	AGTAAGTCGATACATCACACCC	58.111	45.455	3.889	100	7.832	A	12
54921	GAGTCCTACCGGCTGTGTG	60.528	63.158	1.528	CCTTCCTTCCCTGTGGCAC	61.064	63.158	2.064	122	3.592	ACGC	6
54922	GGACCATAACTTGTCTGAGCC	59.124	52.381	1.876	TTAAAGGTGGCGGTATTGGG	58.631	50	1.369	111	3.244	C	15
54997	TGTTGAGGTTTCTGGATCACAC	59.289	45.455	2.711	TCACCCGTTCAGAGGAGTTC	59.793	55	0.207	122	2.918	AC	22
55086	CGAAGGTCTTAACTATGCGGC	59.882	52.381	1.118	GTGCTGCGAACCTTGTTAAC	58.698	50	1.302	118	2.420	AAAT	11
55188	AGTGCATTCTTCAAGAGGGC	58.928	50	1.072	AGTGCAAGATGTCATGTGAACC	59.946	45.455	2.054	128	3.126	A	18
55604	CGCAGCGTTGATTGTGTTC	59.015	52.632	1.985	GAGCAACTATACACGGCTCAC	59.548	52.381	1.452	112	3.437	AG	18
56138	AAAGGGCCTATAACGACGCG	61.275	55	1.275	ACAGTCAATTTGTGTCGCCC	59.798	50	0.202	108	1.477	A	10
56231	CAGAGGAGGGTCGGTTGC	60.478	66.667	2.478	ACACAACAGTAAACGCCGTG	60.083	50	0.083	104	2.561	C	12
56298	ACTGAGGTTAGTCTGACGCG	60.223	55	0.223	ACTGCAACCCATTCGAAACC	59.795	50	0.205	117	0.427	AAAT	7
56517	TCCGTGACCTGCTAATACCC	59.646	55	0.354	TTACGATCTGCTACACATGGAG	58.45	45.455	3.550	132	3.903	A	10
56523	CTATTGGAAGAGGCCCTCCC	60.005	60	0.005	AACTTCTTGGTGATGGCCTG	58.849	50	1.151	100	1.157	AG	20
56694	GGAAGCAATGCCACCCAC	59.771	61.111	2.229	CTCACCCTCCCTCACACC	59.363	66.667	2.637	100	4.866	C	22
56695	CTGTGCCATTGTGCCACTC	60.158	57.895	1.158	TCGTGGCATGATACAGGGTG	60.581	55	0.581	105	1.739	AAT	9
56774	AAGCAAGGACCCGATGTAGG	60.224	55	0.224	CACGCCATGGAAGCATAAGG	60.082	55	0.082	111	0.305	C	14
57144	TATTTGGCGACTAGGGAGGC	60.007	55	0.007	AGCTTCATGATTTGTCCGCC	59.654	50	0.346	144	0.353	AAG	24
57148	CGCATTCGTCAGGTCGTG	59.639	61.111	2.361	CTGGATCGATTTGCCAGCTG	60.082	55	0.082	135	2.443	A	11
57156	TCAGGGCAAGAGAGTAAGCC	59.862	55	0.138	CGCTTGTTACCGCTACCATC	59.806	55	0.194	103	0.333	A	11
57287	GCTCTAGAACCAATGACGAAGG	59.562	50	2.438	GTCGAACGAGCTAGGTGAG	58.119	57.895	2.881	136	5.319	A	11
57397	CCTCCTTCCAGCCTAACTTC	58.059	55	1.941	GTTCTGGTTGTTGGTGGGAG	59.437	55	0.563	132	2.504	ATC	9
57413	GGGTGAGGCAAGTACCATTC	59.005	55	0.995	TCACATGTTGACCCTTCCAG	58.196	50	1.804	123	2.799	A	13
57596	TAGGCCAGCAGTTGACCTTC	60.440	55	0.440	ACACCGCTCCATACTTATACAC	58.443	45.455	3.557	136	3.997	A	10
57680	ACACCTGGCCATTTCAATTCC	59.869	47.619	1.131	TCGTCATTTAAACCTACTGCGG	59.498	45.455	2.502	101	3.633	C	10
58058	GACAGGAGAGGTGCCTACAG	59.937	60	0.063	TTCAGGCCCATTCCCACTTC	60.735	55	0.735	127	0.798	A	11
58163	CCTTCATGGTGTACACAGGG	58.643	55	1.357	TGAGCCTACACAATCCTTTCAG	58.825	45.455	3.175	144	4.532	A	12
58215	GAGTGGGAGTGGCTCTGTTC	60.793	60	0.793	GAGGAGTATTAGCTTCGTCACG	59.124	50	2.876	114	3.670	ACAG	8
58285	TTTCCGAGACTGGAATTGCG	59.306	50	0.694	CACGTTACGCATCTTCACGG	60.358	55	0.358	103	1.052	C	18
58466	TTGCTCAGTTGGTTGGTTGC	60.294	50	0.294	CGAAGCATCCAACCAACCC	59.861	57.895	1.139	104	1.433	AAGC	6
58475	TGAAACGTTAAAGAGGCAATCG	58.348	40.909	3.652	AGAGAAACGCGTTACACCATC	59.41	47.619	1.590	134	5.242	A	13
58808	TGGATAACACTGTGCCACCC	60.730	55	0.730	AATGGGCGTGACTACCAGTG	60.795	55	0.795	104	1.525	C	18
58891	GTACAATAGGCCCATTAGCGG	59.332	52.381	1.668	TTTCCCTCGTAACCCATTTCC	58.692	47.619	2.308	100	3.976	A	10
59944	TGTTCCGTGATGTAAAGGCC	58.938	50	1.062	GGTTAACTCAAACTGGCGGG	59.869	55	0.131	101	1.193	C	20
59997	TCACCTGTGTCTGATAGCGG	59.938	55	0.062	GCGCAATTGAAAGCCTTGTG	59.946	50	0.054	121	0.117	A	11
60012	GAGGTGTATGGTGCTGACAG	58.733	55	1.267	CCGTTCATCTTCCCTATGTGC	59.539	52.381	1.461	106	2.729	A	10
60021	AAACGGCAGCTTTCAGAGAG	59.231	50	0.769	TTTAGTCTGTGGGAGGTGGG	59.417	55	0.583	140	1.352	AC	41
60450	GTGTGCCCTTACCGAGACTC	60.857	60	0.857	TTGATTTCCGTGAATTGCCG	58.113	45	1.887	108	2.745	A	10
60456	CCGCGAGCAACAGAAAGG	59.859	61.111	2.141	TTCTAAGTGGAGTCGAGGCG	59.94	55	0.060	119	2.201	A	10
60553	GAAGTGGCGTTCTTGAGGTG	59.872	55	0.128	TTCGTGAGGTATGGTGGAGC	60.223	55	0.223	142	0.351	A	10
60638	CTTCCACTCAACACGTCCTG	59.240	55	0.760	GAGAGGCCAGTGACTACCTG	59.937	60	0.063	138	0.823	A	10
60644	TCGGATTCAGAAATGTCCAGAC	58.900	45.455	3.100	ACGGTGATATTATGACGCACC	58.999	47.619	2.001	100	5.100	C	10
60734	CGTGCAGTTGATAGGCATAATC	58.350	45.455	3.650	AACACTAACAGCACCGCAAC	60.082	50	0.082	130	3.732	ACC	9
60998	ACTGGGAAGAGCTAGGCATAG	59.450	52.381	1.550	TCCCGTCATCTGTCCACATC	59.936	55	0.064	115	1.614	C	11
61081	GTGCCTTAGTATGTGCACTGAC	60.078	50	2.078	TCTCGCGTGCTCTCTCATG	60.305	57.895	1.305	119	3.383	AC	22
61228	GTCACGGACCTTTCTTGAGTG	59.611	52.381	1.389	AGTTTGACACACCATTCCGC	59.798	50	0.202	131	1.591	A	10
61596	AGCAGGAGATAAGTTGTTGGC	59.047	47.619	1.953	GAAGGTCTCTGCTCCCTGG	59.855	63.158	1.145	114	3.098	AACT	11
61710	AACCGTGACCTTCCAGTTTG	59.079	50	0.921	GTCAACAGCAGCAAGAGTCC	59.872	55	0.128	106	1.049	A	10
61900	TGTTTATACAGAGTTGGCGGG	58.779	47.619	2.221	CCCTTTGTCTTCTGTTTCGC	58.05	50	1.950	108	4.172	C	20
61939	GTGCCTTAGTATGTGCACTGAC	60.078	50	2.078	GCTCGCGTGCTCTCTCTTG	61.882	63.158	2.882	119	4.960	AC	22
61988	TGAAAGTGAATTGTGCAAGACG	58.796	40.909	3.204	ACGAACAGACACATCATTGCG	60.28	47.619	1.280	119	4.484	AC	9
62084	GAAGAGATGGTGTTTCGTTTCG	58.685	45.455	3.315	TCTCCCTTGTTCCGCTCTTG	60.438	55	0.438	131	3.753	AC	10
62112	TTCCCGAGAACAAACACAGC	59.444	50	0.556	GGTTGCACAAGAAGCCTTAAG	58.46	47.619	2.540	101	3.096	A	10
62165	GCTTCCTCGTAACAAGTCACG	60.016	52.381	1.016	TGACAACTCTGCCGTCCC	60.006	61.111	2.006	100	3.022	C	11
62431	TGCATTCCGTTAAATAAGCTGC	58.724	40.909	3.276	TTGGCGGTGAAGTCAGAGG	60.383	57.895	1.383	114	4.659	A	11
62485	AGAGATGGCCTGGACATGTAC	60.007	52.381	1.007	CCGGTTCTTCAAAGGTATCCC	59.12	52.381	1.880	104	2.887	A	10
62682	ATTTCATTTGTCGCCCGTCC	59.940	50	0.060	TCCGAATTTCTCACTTCTCAGC	59.168	45.455	2.832	131	2.892	AAT	10
62885	GGGATTGTGAAAGGGCGAAC	60.223	55	0.223	TTCCGACTCTACCAGCATGC	60.579	55	0.579	117	0.801	A	10
62944	TGCCTCTGACTGTAAGTGGG	59.789	55	0.211	ACGAACGCCCGATTGATATTAC	59.694	45.455	2.306	111	2.516	A	12
63177	TGCCCTCAAAGCTAAGAGTG	58.279	50	1.721	ATCTCTACTCGTTGGTGTGATC	58.119	45.455	3.881	121	5.602	AC	31
63445	GGATAGTACTGTCACCCTCCG	59.805	57.143	1.195	CTGTTTGCGCAATTATAGCGG	59.358	47.619	1.642	126	2.837	A	13
63653	GTTTATGTCTCGGGTCATACGC	59.952	50	2.048	CCACCTACCGAGCAACACAG	61.419	60	1.419	115	3.467	AC	12
63800	ACATTGGACACCGGACTAAATG	59.421	45.455	2.579	AAATTTGACGCTCCTGTCCC	59.221	50	0.779	137	3.357	AC	23
64168	CGTAGTAGGCAGGGCGTTAG	60.712	60	0.712	TCGCCCAATTCATTCACAGC	59.939	50	0.061	131	0.773	C	13
64369	AGGACAAGGAGATGAAGGCC	59.859	55	0.141	TGGACATCTTCAGTCTGTTGTG	59.03	45.455	2.970	124	3.111	AT	9
64484	AGTTCAGAAGAGACCTACCAGC	59.943	50	2.057	GGACCTAGACCGCCTCATTG	60.65	60	0.650	123	2.707	AC	26
64594	AATTCACACCCTGCTACGTAG	58.510	47.619	2.490	ATTCGGCATGCAGTCTACAC	59.091	50	0.909	125	3.400	A	11
64596	GTCTGGCTTGCCGTACTTAC	59.383	55	0.617	AGGAGTTCTACCGAGTGTGATG	60.011	50	2.011	106	2.628	AC	9
64628	ACACACCGAATCTGAGTGGG	60.438	55	0.438	ATATGTTGCGTCAGGTTCCC	58.718	50	1.282	124	1.721	C	12
64642	AAAGGCAATGCAGACGAGAC	59.587	50	0.413	CATGACACATATTCGGGCTCC	59.606	52.381	1.394	100	1.807	C	11
64715	GAGGGACAGACACAATGAAGC	59.673	52.381	1.327	TAATGCCACCATGAGCTCAC	58.715	50	1.285	141	2.612	AC	19
64727	TGCAACGGACTGGAAGTTTC	59.444	50	0.556	TTTACAGGCGGCTGGGTG	60.718	61.111	2.718	110	3.274	C	12
64732	CGACAGAACAGCTAGCATTGG	60.081	52.381	1.081	CCGCTGAGATATCGTGTGAG	58.691	55	1.309	132	2.390	AT	19
64954	CTTCACTGTGTCGTTCGCTC	59.947	55	0.053	TTGTTCCTTCGTTCGTTGGC	60.082	50	0.082	124	0.135	ACCG	6
65208	AACAGAACACGACACAGCG	59.431	52.632	1.569	TTAACACGGTTGACTGCACG	59.805	50	0.195	134	1.764	C	18
65221	AGTTGTGTCTTCTGGAGCAG	58.215	50	1.785	GTCTAAATCCCGGCGTTGG	59.347	57.895	1.653	117	3.438	C	19
65242	ATTAGCCGACGTGCCCAG	60.555	61.111	2.555	TGTGTTGTGGAGCTGCATG	59.413	52.632	1.587	140	4.142	AAG	31
65347	CACGTGTGTTAGGGACCC	58.050	61.111	3.950	GTGTGAATACCCTGCATAACGG	60.142	50	2.142	102	6.092	ATC	8
65684	AGCCAAGAACAAGCTCTCTG	58.574	50	1.426	AGAGGATATTACTGGTGCGGTC	60.141	50	2.141	106	3.567	AG	17
65704	CTTTCTGTGCAACTCCTCCC	59.225	55	0.775	CCAGACAACAAACAGTGGCC	60.364	55	0.364	123	1.139	C	10
66172	ACGCACTAAGAACTTTACGGC	59.680	47.619	1.320	GAGCGAAGGACTACGAAACG	59.467	55	0.533	136	1.853	AAC	17
66488	TCACGCCAAGTCAACCAATG	59.798	50	0.202	AAACAGTTCCGTCGCTCAC	59.132	52.632	1.868	133	2.070	AC	27
66642	TCACGTCAAGTCAACCAATGC	60.147	47.619	1.147	CACAACTTCCTTCGCTCTCG	59.668	55	0.332	133	1.479	AC	27
66665	TGCCAGCAAATAAGTCACTCC	59.325	47.619	1.675	AGGGCCCATAAATGTCGGAC	60.586	55	0.586	143	2.261	A	12
66841	ACGTACTTACTGATGCATGTGG	59.235	45.455	2.765	CAGTGCCGTATGATGTGTGG	59.732	55	0.268	115	3.033	A	10
67179	AAAGTTATTGCAGGCCCTCC	58.915	50	1.085	AATAACAAGCTGTGATCAAGCC	58.051	40.909	3.949	112	5.034	A	10
67888	CCTGTGTTCTGGTTCGAAGTG	59.879	52.381	1.121	CAAAGCAGCCGACATTTGTTG	59.949	47.619	1.051	134	2.172	A	11
67960	CACAGGGTTGCACAAGAAGC	60.714	55	0.714	GCGACACATCATACAGGGTG	59.451	55	0.549	106	1.263	A	10
68023	CCCTGTTGAATAGAAGGCCG	59.084	55	0.916	GAACGTACCTAGGGCCTATCC	59.872	57.143	1.128	106	2.044	AC	17
68142	GCGTCGAATGAGATGTGAGC	60.153	55	0.153	CACCCAGTTCACTTCTTGGC	59.797	55	0.203	138	0.356	A	11
68277	CAGGAAACAAGGAGCTGAGG	58.936	55	1.064	ACTCCTGTGTCTTGCGGG	60.006	61.111	2.006	100	3.070	A	11
68325	TTGTAAAGTGTCGCGCAGTC	59.876	50	0.124	CGCTGACTACAAACGTTCCC	59.945	55	0.055	110	0.179	A	11
68549	TGCGACACAGACCTAGGAG	59.183	57.895	1.817	AGCTCTTGACTTTGGCCTAAC	58.979	47.619	2.021	132	3.839	C	14
68587	TGCGACACAGACCTAGGAG	59.183	57.895	1.817	AGCACTTGACTTTGGCCTAAC	59.531	47.619	1.469	132	3.287	C	14
68669	CTCAGGCCGCCTCATTATTG	59.515	55	0.485	CGACACGCTGATCATTGGTTC	60.675	52.381	1.675	103	2.160	CG	9
68910	AGATCAATCCAGTCCAGCCC	59.932	55	0.068	TTTGGTGGAAACCCGGTACC	60.948	55	0.948	126	1.016	C	10
69098	GGTGGGTTCGTAGCGTCTG	61.181	63.158	2.181	GCTGAGTCTGCCAGTATGAC	58.811	55	1.189	104	3.370	A	10
69489	CCTTCAGCCGAAATCAACCAC	60.550	52.381	1.550	TGACTCAGTGACAGTGTCCC	59.72	55	0.280	116	1.830	A	12
69596	CCTTGCTTTAGAGACCTGGC	59.010	55	0.990	CGGTCACTCAGCTAATACGC	59.253	55	0.747	104	1.737	AT	14
69977	GCTTTGGAAGAGGTTACGGC	59.941	55	0.059	ACTGGAGCCACAATGAGAATG	59.045	47.619	1.955	126	2.014	AATG	6
70057	AACACTGTGGCAAGCGTATG	59.871	50	0.129	GTAACAAGGGCGCTGCTC	59.549	61.111	2.451	112	2.580	C	14
70217	TCATCCTCCTAAATTCGGCTG	58.288	47.619	2.712	TGTGGAAGTTCAAGAGAGTGTG	58.965	45.455	3.035	117	5.747	AC	12
70233	GTAGTGCTGTACCCTCCCAG	59.936	60	0.064	AGGAAGTGAGGAGAAGGGTG	59.124	55	0.876	136	0.940	AC	8
70242	CCAGAACGAACTAAGGACAGC	59.409	52.381	1.591	ATGTAGCTTCAAGGGCAGCC	61.161	55	1.161	102	2.753	A	11
70510	CTACCCGACTAGACACTCCC	59.078	60	0.922	AATGACTCAGAGGACGGCAG	60.223	55	0.223	111	1.145	A	10
70675	CCACCAGGTTGCACATCAC	59.786	57.895	1.214	CCACCCTTCTGACCCATTAAC	59.043	52.381	1.957	129	3.171	A	14
70819	TCCCGGTCTTTAAACGTTCG	58.959	50	1.041	GGGCCATCTTTACAGCGTTAG	59.81	52.381	1.190	101	2.231	AT	8
71605	TTGCCCTTAGTCACAGCAAG	58.861	50	1.139	AAACTCCGCTACTCACACTAC	58.179	47.619	2.821	121	3.960	A	10
71639	CCGATCTTACACATTCGACCC	59.275	52.381	1.725	TGCGGTCAGATCGTTGTG	58.467	55.556	3.533	101	5.258	C	14
71793	AGGTAGGTCACGGAACACAG	59.793	55	0.207	TCCTTCCGCCTGTGATCTAG	59.358	55	0.642	127	0.849	A	11
71834	GACTGACGAACCAAAGGCTG	59.872	55	0.128	CTTCCTGCATCACAACCCTC	59.296	55	0.704	102	0.831	C	13
72491	GCTGGGTTAGGTTGGGTTG	59.101	57.895	1.899	CCAAACCCATCCCAACCTAAC	59.593	52.381	1.407	146	3.306	AACCT	6
72629	CTTCACACCAGCAGCGAATG	60.570	55	0.570	ACCACCGCCATCTTTGAATG	59.58	50	0.420	113	0.990	C	13
72643	TTGACAAAGCTGCACACGAG	60.083	50	0.083	ACCTTCAACCGCCTTCTTTG	59.437	50	0.563	126	0.646	C	11
72644	CTGTATCCAAAGTACCGCGTG	59.815	52.381	1.185	CGTAACTCCGATCTTAGTGACC	58.797	50	3.203	103	4.388	A	10
72728	ATTGTACAGGAGGCTGGGTG	60.151	55	0.151	TACAGTTAGCGTGCCTGAGG	60.223	55	0.223	110	0.374	C	10
72782	TCATCCATCGTGTGTCAGGG	60.223	55	0.223	GCAGCACTTCCTACTTGCC	59.566	57.895	1.434	123	1.657	C	13
73034	TGACAGGTTGTTCATACGCAG	59.337	47.619	1.663	TGGGTCTGTAGTTCTTCGGG	59.501	55	0.499	127	2.162	AAT	14
73042	TCATCCATCGTGTGTCAGGG	60.223	55	0.223	CCTTACCTCATGCCCGCC	60.951	66.667	2.951	119	3.174	C	13
73050	TCCTCAGGTGAATGGAGGG	58.762	57.895	2.238	CTCTGCTTCCGTCCTCAGG	60.232	63.158	1.232	136	3.470	AAGAG	14
73055	CCGGGATAGGTGAATATTTCCC	58.819	50	3.181	GGTTCTGTCAGTTCTGTCGG	58.957	55	1.043	119	4.223	ATC	16
73270	GACCATTTACAACCCTGCCC	59.577	55	0.423	CATCCGCATCGTCTTCTTCG	59.878	55	0.122	137	0.545	ACG	17
73352	ATGTTCAGCTTCACGTCCTG	58.947	50	1.053	ACTGTCTCAAATTTGCCACCC	59.802	47.619	1.198	116	2.250	C	10
73355	TTCCAATACCAGCTTCCTCG	58.066	50	1.934	CATGGGAATAGTGGATGTTGGG	59.547	50	2.453	122	4.387	AGG	10
73515	GACCCGCCGTAACCATTTC	59.644	57.895	1.356	CTGTCAAACTGTCTCAAGCCC	59.877	52.381	1.123	104	2.480	C	10
73686	AAATCAGTGACGACCAGGTG	58.582	50	1.418	CCCATCGAGCCTTAATACCC	58.283	55	1.717	127	3.135	A	10
73847	GTCTGACAGGTGCAGGAAATC	59.673	52.381	1.327	GTGGGCCGGGATAACAGAG	60.608	63.158	1.608	104	2.934	C	10
73923	CCGGGTTGTGATATGGGTTG	59.366	55	0.634	CACTACCGCTCGACCACTC	60.596	63.158	1.596	133	2.229	C	13
74052	CTGTTCCGAATGACACTGGG	59.304	55	0.696	TGCTTCATCACGTACGGTTTC	59.68	47.619	1.320	126	2.016	A	11
74088	GACATGCGAGCTACTGTAATGG	59.951	50	2.049	CGGCTTCTTTCTTTGTTGTGG	59.011	47.619	1.989	126	4.038	AAT	15
74216	CTGCCTGTTTGCCATGTATTAG	58.457	45.455	3.543	CCACCGTGTCATACCAGCG	61.545	63.158	2.545	140	6.088	AAT	9
74296	ATCAGTCCTCCGAGAAATTACC	58.094	45.455	3.906	GGACGACAAGACCGGATAAC	58.821	55	1.179	136	5.085	AAG	8
74356	AGAAATCTGGGAGCCTCGAC	59.935	55	0.065	CTTTCTTGGCGTGGAAGACC	59.87	55	0.130	100	0.194	A	10
74372	GCTGGATAACTAAGGCCACAC	59.467	52.381	1.533	TGGCGTAACTATTGTGGCTG	59.016	50	0.984	115	2.517	AC	9
74401	CACTGAATGACTGAATGCGC	58.560	50	1.440	GGAAACGAAACTCACAGGCG	60.499	55	0.499	117	1.938	A	10
74666	ACTGTGCTTCTGTCGGGATG	60.793	55	0.793	TGCAAGCCAACTGATCCTTTC	59.873	47.619	1.127	126	1.920	A	11
74711	TTGTAACAAGTGCCATGCCG	60.152	50	0.152	GAAATCTCTGGCTCTCGATTCG	59.696	50	2.304	129	2.456	ACGC	11
74875	ATGAACCAGCAAACACCAGC	60.080	50	0.080	TATGCACCAACGAATGACCC	59.009	50	0.991	144	1.072	ATC	9
74902	ATGTATCGACGTGTGGTGAC	58.467	50	1.533	ACGGAATGTGTCGTCAAGTTG	59.88	47.619	1.120	113	2.653	C	14
75296	GGTTCTCCGTCTCTACAGGG	59.651	60	0.349	CTCGCACAGTTTATCCTCGG	59.176	55	0.824	116	1.173	C	10
75408	TCCATAACCACACTCCTTCTGG	60.207	50	2.207	TGCCCTCAGAGTGCGTTTG	61.346	57.895	2.346	115	4.553	A	10
75570	CCCTTCGACTCTGCAACCC	61.125	63.158	2.125	ACTTGCTACTGTTACGGGTAGG	60.273	50	2.273	107	4.397	A	10
75636	AGACCTGCCATCTGTGTACG	60.223	55	0.223	GAACTCGCCATGGAAGAGAC	59.097	55	0.903	109	1.126	AC	16
75669	GAGGGAGGCCAAATCGACC	60.907	63.158	1.907	TGTGTCGAATGTGCAAGTCG	59.875	50	0.125	110	2.032	A	10
75758	GGTTGTTCCTTCCGAGTGTTC	59.878	52.381	1.122	AAACTACTGCCACATTTCAAGC	58.515	40.909	3.485	103	4.607	C	16
75812	CGTCACTTTGCATTGAGGCC	60.850	55	0.850	ATGACAGGTGCGGACAGAC	60.456	57.895	1.456	123	2.306	A	11
75899	CCCGCCCACTTGAAATGTAC	59.940	55	0.060	AGAGAGGTGAAATCGGTGGAC	60.215	52.381	1.215	119	1.275	A	10
75933	ATTTACGCCGAATGATCCGG	59.236	50	0.764	GTGTGTGCGGGAAATCTCG	59.941	57.895	1.059	111	1.824	C	13
76085	ACACACAGAGTTACGTATACCC	58.051	45.455	3.949	CATGGACAATGCCCGGTTC	59.935	57.895	1.065	127	5.014	A	10
76292	TAAGACTGCTGCCACCGG	60.085	61.111	2.085	TTTGCCAACCTGTTATCCGC	59.867	50	0.133	130	2.218	AAT	8
76305	GGCAACAACACCGTACCATTAG	60.592	50	2.592	TCCGAGGTGAAGAATGCGAG	60.576	55	0.576	116	3.168	A	12
76637	ACAACAACAACTCACCTCCG	59.086	50	0.914	GCAGGGCACAGATCATCCAG	61.576	60	1.576	120	2.490	A	10
76666	TACTTGTGCTGCTGTGCC	58.676	55.556	3.324	TGGAATTTACAAAGCGGAAGTG	58.259	40.909	3.741	139	7.066	ACT	13
76948	CAACCAACCGACTGACTGAC	59.522	55	0.478	CCATGGAGTTGCTTAGTCAGTC	59.493	50	2.507	119	2.985	AACT	10
76976	TCATTCCATCGGTGCTCCAC	60.867	55	0.867	TTCAGGCTTCTTGTGCAACC	59.723	50	0.277	102	1.143	AAT	12
77001	GGGCTTATTTGGAGGACTGG	58.704	55	1.296	AAAGCTCAACTCTTACGCGC	59.944	50	0.056	112	1.351	AC	8
77069	GAAAGAGATTGCAGGGTGGC	59.939	55	0.061	GGTCTTCCTAGGCTCCTGG	59.241	63.158	1.759	124	1.820	A	11
77160	CTGTACAACCAGGGAATGTGC	59.943	52.381	1.057	TATTCCGAATTCTGCGAGCG	59.248	50	0.752	101	1.809	A	13
77266	GTACGTTTGAAACAGCGACG	58.799	50	1.201	GCAGAGTTCAGTTTCGTTTCTC	58.618	45.455	3.382	127	4.583	A	10
77345	CGTCTGCAGCCAAGGATAC	59.054	57.895	1.946	GAAGACGAAGAAGCCGCC	59.247	61.111	2.753	125	4.699	AAG	16
77624	AGGAGTCCTACCGAGAGTGG	60.515	60	0.515	AGTACACCTGATCAGAAACGAG	58.317	45.455	3.683	124	4.198	A	10
77855	AGAGGGAAGGGCTACAACAC	59.787	55	0.213	GACTCCTCCGTGTTGTAGCC	60.857	60	0.857	123	1.071	A	11
78111	TTGCGGTCAATGTGTGCG	60.088	55.556	2.088	CGAATTGGAGCGAGCACAC	60.303	57.895	1.303	123	3.391	AC	35
78151	AGCATCTAACAATGAGTGCTGC	60.077	45.455	2.077	AGGCACAGCAGGATGAATTC	59	50	1.000	118	3.077	AT	15
78243	GAAATTCTGCATTGTTCGCGG	59.819	47.619	1.181	CTCTATGACGGATTGCTCACC	59.001	52.381	1.999	124	3.180	A	11
78548	CTCTCCTGCTTAACATGACCTC	58.969	50	3.031	TCGCTCTAGTAACAGACCCAC	59.669	52.381	1.331	110	4.362	A	11
78621	GAATGGGCATGTGTCGTGAG	60.012	55	0.012	TTTCATCAACATCGCGGCG	60.303	52.632	1.303	122	1.316	AAG	8
78814	CCTAATTGTAAGAGGGCGCG	59.522	55	0.478	TATGAGGTCGAGCAATCACG	58.25	50	1.750	106	2.228	AC	8
78858	GGAGGCCATTCTACACATGC	59.440	55	0.560	GAGCTGAGTTGTTCCATGTGG	59.944	52.381	1.056	125	1.616	ACAG	8
79085	GACCACCTACCCACACCTAG	59.573	60	0.427	TTGCTGCTCTCCGATCACC	60.531	57.895	1.531	129	1.958	C	10
79273	TTTGTGTACAGGGCAGGGC	60.991	57.895	1.991	CATACAAACAAGAGCAACAGCG	59.51	45.455	2.490	147	4.480	A	10
79302	TCAATCGTGTATCTGAGGCTTC	58.711	45.455	3.289	AAATGGGATCTCTTGCACCG	59.003	50	0.997	116	4.286	AAG	9
79303	GCAGCAGACAACGTAATGAATG	59.320	45.455	2.680	GGCTCCTTCCTTAGTCTCGG	60.009	60	0.009	137	2.689	AATG	15
79482	AGAAGTACCAGGGAGAAAGGG	59.230	52.381	1.770	ACTACCTGTCGCTACACATCTG	60.337	50	2.337	100	4.106	AAT	13
79508	TGCCAAGGATGAGACTCCAG	59.861	55	0.139	TCCTCTCCACCTTCTGCAATC	60.215	52.381	1.215	143	1.354	AG	8
79587	ATGCTGCGATTCCAGTACAG	58.803	50	1.197	AGCTGCGACACTGTATACCC	60.294	55	0.294	125	1.491	AAT	8
79777	GCAACACAGGCCATAACAATC	58.868	47.619	2.132	GTCACACTAAGTAGCCTGGC	58.736	55	1.264	116	3.396	ACC	9
80000	GCCTTAAAGCTGCGGTGC	60.547	61.111	2.547	TCTCTGTGTTCACATCCTGTCC	60.47	50	2.470	100	5.017	A	10
80022	GAGGTCACATGTCGTCAGG	58.312	57.895	2.688	CGGACAAAGGACGGACATTG	59.943	55	0.057	126	2.745	AC	14
80168	GAGGTCACATGTCGTCAGG	58.312	57.895	2.688	GGACAAAGTTCGGACAATGC	58.405	50	1.595	125	4.284	AC	14
80398	TTCCGTGCGCAGGTGTATG	61.480	57.895	2.480	TCAATATCACACAACGCCCG	59.379	50	0.621	107	3.101	C	10
80496	CAGTCCTTCCATCACACCAAC	59.603	52.381	1.397	CAGTCCCTGTGTGCCATTAG	59.01	55	0.990	130	2.387	C	16
80607	CCCTCAAGCCCAATTTGTCG	60.223	55	0.223	AAGCCTCACGTACCTCACTG	60.152	55	0.152	141	0.375	AC	10
80821	GAGAGCGTCAGAAGTTTACGG	59.485	52.381	1.515	CGGTTTCAAACATTCATCGCG	59.822	47.619	1.178	148	2.693	C	15
80902	ATGGAGCGAACACTGACTCC	60.508	55	0.508	ACCTAATTCCCTCTGCGCAC	60.867	55	0.867	111	1.376	ACGC	6
81070	GCTTTGTGGCACTGTCAGAG	60.152	55	0.152	TTTCCTCCGTATAAAGAGTGCC	58.632	45.455	3.368	104	3.520	C	10
81088	GGTCTCCTCTTATGCCACATAG	58.500	50	3.500	TGTGTCTCAGAACCGCAAAC	59.448	50	0.552	108	4.051	A	12
81113	ACAAACTACTGACTGAGCAGC	58.993	47.619	2.007	AAAGACTGACTGCTCCTCAAG	58.362	47.619	2.638	144	4.645	A	10
81228	CAAGCCCATGTGCCAGTAAG	59.939	55	0.061	ATGAGCCCACTTCCCATGTC	60.515	55	0.515	128	0.576	A	11
81339	CCATCTCGCTTGCACAACAG	60.570	55	0.570	TTGTCGTCAGAGTGGCAAAC	59.448	50	0.552	114	1.121	ACGG	11
81372	CGAGACTTACGATCTTTGTGGG	59.567	50	2.433	GAGGACAAAGACCAATGGATCG	59.818	50	2.182	109	4.614	AC	10
81670	ATTGGCTTCCCTACAGACCG	60.224	55	0.224	ATGTAACGCAATGTACATCGC	58.152	42.857	2.848	131	3.072	A	10
81885	GGGAAATTTGACGTATAGGCCC	59.881	50	2.119	TTTGCACCCGTTTGACCC	59.218	55.556	2.782	108	4.902	C	13
81926	AAGGGAGGGTGGTGCTAATC	59.857	55	0.143	CGCCCATCCTTTCATCCTAC	58.868	55	1.132	116	1.274	C	11
81975	GGCTGGTTAGACGCTGGC	61.556	66.667	3.556	CTGACATTCAACGCCTCCC	59.27	57.895	1.730	114	5.286	C	16
82289	CAACCAACCACCCGACCG	61.713	66.667	3.713	TCTGTCTGTTGGTGGGTTGG	60.586	55	0.586	127	4.300	AACC	7
82289	TTGGTCGGTTGTTTGATCGG	59.516	50	0.484	ATCCATCAAACCATCCCACC	58.314	50	1.686	102	2.170	AACC	7
82299	AAGTTCGTCGAGCCAGCAG	61.112	57.895	2.112	ACGGTAGTACTAAGCGCCAC	60.293	55	0.293	123	2.405	C	21
82390	GGACGTACCCTTCATAATGCC	59.264	52.381	1.736	TTTGGGTCGGCGGAGAAAC	61.348	57.895	2.348	101	4.084	C	11
82548	AGAGGAAGCTAGTGTCAACAAG	58.500	45.455	3.500	TCATTGTTGGCGTTGGTCTG	59.798	50	0.202	141	3.702	A	12
82642	TTCGAGGCTTTGAGATGCAC	59.304	50	0.696	AACCGGTTCTCCACGTTG	58.288	55.556	3.712	119	4.408	A	10
82966	AGCTTCTCAAGACGGTCTCC	59.865	55	0.135	CTAACTAACTAACCACCCACCC	58.557	50	3.443	119	3.578	AACT	6
83583	CACTAAGCCTTACCGTCCAAAG	59.755	50	2.245	CTGTGTGTGATCGTGAAGCC	59.944	55	0.056	103	2.301	C	11
83651	CATGTGCCAAGAATTACCACTG	58.654	45.455	3.346	GCATTGCAAGGAATTGGACTC	58.865	47.619	2.135	120	5.482	AAT	15
83813	GGACGAATAAAGCAACGTGAAC	59.260	45.455	2.740	GAAGTGTCGTGCGGTTTCAC	60.77	55	0.770	140	3.510	C	14
83983	GTGGGAAAGGGAATGTTGGG	59.500	55	0.500	CTCTTCTTTCGGCTGCAGTG	59.943	55	0.057	115	0.557	C	13
84206	GTCACTTCACATCAATCCCTTG	58.064	45.455	3.936	CCCAAACTTAATCTAGCGCACC	60.4	50	2.400	129	6.336	C	12
84361	CTCAGGGTCGCATGCAAG	59.236	61.111	2.764	GGCTGAAGGATGAATCACGTAG	59.627	50	2.373	131	5.137	A	11
84767	CTTAATACTTCCGGCAGCGC	60.153	55	0.153	ATAAGGTGGTCAGCCCTACG	59.645	55	0.355	125	0.508	C	10
84982	TATCTTCACCCACATCGCCG	60.649	55	0.649	CCACTGTTCACAACCATCGC	60.501	55	0.501	100	1.150	ATC	10
85157	AAGTTGTCGCCTTCCCTCAG	60.725	55	0.725	TCACAGCGCTCCTTCTCG	60.164	61.111	2.164	129	2.889	ACC	11
85360	AAGTTTGCTAAGACGCCACG	59.873	50	0.127	CGTTTCGCTGTTGTTGTCTTC	59.364	47.619	1.636	118	1.763	A	14
85416	GCCATCTCAATCTCAGTCATCC	59.360	50	2.640	TGTCCATATCTCCTGCAGTGG	60.007	52.381	1.007	119	3.648	C	12
85504	ACCTCGTACGCTGATCACC	59.935	57.895	1.065	CTTCTGCCGAGCCAACAAC	60.158	57.895	1.158	107	2.223	C	15
85516	ACAACATGCACAAATTTCCCAG	59.031	40.909	2.969	CTATTCCATGTGAGGTGCTGC	59.808	52.381	1.192	128	4.160	A	11
85608	ATGTGTCACTGGTATCATGGAG	58.357	45.455	3.643	GAGGAGGCTATGGACCTGTC	59.719	60	0.281	142	3.925	AATG	8
85741	CATAGACTGGCTGGTGGACC	60.582	60	0.582	GCACATACTGACATAGCTGGC	59.878	52.381	1.122	112	1.704	A	12
85903	AGAGAGAAGGGAAGGGCC	58.281	61.111	3.719	CTACCGGGTCGATACACCC	59.711	63.158	1.289	110	5.008	C	12
86037	CCACAATAGGGCAGTTGAGC	59.654	55	0.346	AGTGGCCGTGAATGTTATGC	59.655	50	0.345	118	0.690	ACG	9
86075	CTGCTCGCGAAACTGCATAC	60.700	55	0.700	AGTTGTTGTTATTGGCGGGC	60.152	50	0.152	118	0.852	C	14
86079	CAACAGTGTCCACATCCTGC	59.870	55	0.130	TGTTGACAGTAATGAACCGTGC	60.207	45.455	2.207	123	2.337	ATC	17
86234	AGACCCTCGAATGAACGGAC	60.223	55	0.223	TGGCTTCCAAATAAAGTGTTGG	58.167	40.909	3.833	107	4.056	C	12
86527	CTACCGGGTTGCAGCCTC	60.867	66.667	2.867	CGGCTGAAGGGTAAATCACG	59.733	55	0.267	107	3.134	A	11
86544	GTTTGGTCAGGTCAGGTTAGG	58.982	52.381	2.018	AGCGAGAGTTGATGGAGGTG	60.223	55	0.223	105	2.242	AAAT	7
86729	AGGAGTTACAGGACAGAAGCAG	60.207	50	2.207	AGAAACAAACCACAGTGCATG	58.312	42.857	2.688	126	4.895	A	13
86764	AAAGCATTTCCAGTCCTTCCAC	59.878	45.455	2.122	GTGTGCAGTATTGTGTCTTGC	58.817	47.619	2.183	100	4.305	C	12
86776	ACAGACACAAGAATGACGTGC	59.879	47.619	1.121	ACCAAGTTTCACGCTCATGC	60.152	50	0.152	143	1.273	ATC	9
86905	CGCAGAAGGATAAGATGGGTG	59.266	52.381	1.734	ATCCTCCCATCAACGCCTAG	59.716	55	0.284	119	2.018	A	10
86945	GCTACCTGCGTGTTACTGTG	59.666	55	0.334	ACAAATCGACAGAGTGCACG	59.596	50	0.404	121	0.738	ACT	14
87022	TCACTGTTGAGGTTTCGAGATC	58.843	45.455	3.157	TTCTTGTGTAGGTGGTGGCC	60.658	55	0.658	114	3.815	ACGC	7
87426	TTCGTGCTGTTGAAGTTGGC	60.363	50	0.363	GACACTGTAAATAGAGCGGCTG	59.887	50	2.113	128	2.476	A	10
87427	ACCAGCAAGTCAAACAAACTG	58.244	42.857	2.756	GTGCCTCTGATGTTGCTTCC	59.94	55	0.060	131	2.815	A	15
87447	TGTCGTCAGCTCCACACC	60.007	61.111	2.007	ACATTTAACAGCTGACAATGGC	58.58	40.909	3.420	129	5.428	AC	23
87509	GCCCGTAGCGTCTGATGC	61.687	66.667	3.687	TTCTTTGCGTAACCAGCGAG	59.594	50	0.406	116	4.094	A	13
87561	CGGCGCGCCTTAGTAGAG	61.074	66.667	3.074	CCGCACTCACAATCTAGACC	58.815	55	1.185	113	4.259	AG	13
87609	GCAGTGCTGTATTTCTGAAGGC	60.912	50	2.912	TACTCCCAGTATCCAGCAGG	58.685	55	1.315	122	4.227	A	11
87972	TCAGGTGGACAGTCGAACAG	60.081	55	0.081	CTGGCCATCCCTTCTTCCTC	60.586	60	0.586	123	0.667	AAG	8
88180	AAGGAGGTTCAAGAGCGGAG	60.152	55	0.152	AAAGATGAGTTGCGGCGG	59.155	55.556	2.845	104	2.996	C	15
88184	CTCTTGCGTGACGTATGGC	59.725	57.895	1.275	GCTGCATGGAGTTAGTCAGTC	59.474	52.381	1.526	135	2.801	AACT	10
88368	TGATTTCCGCTATCCCTCCG	60.080	55	0.080	AGTATGCGTGTCCCTGTGG	60.157	57.895	1.157	111	1.237	ACC	9
88547	CGGGAGAGTCATTATACAGGTG	58.514	50	3.486	ACATTGTGCGCCTACTGAG	58.598	52.632	2.402	142	5.888	A	10
88612	CTGTTCAGTCTTCTATCCAGGG	58.367	50	3.633	TGACACCGTGCACTTTGTAAG	59.811	47.619	1.189	130	4.822	C	12
88846	ACCAAAGTGTATCAACCCGC	59.224	50	0.776	TTAGCGATTTGGGCCGAAAC	59.941	50	0.059	134	0.836	A	11
88908	GCCCGGTACATATTTCGTTAGG	59.691	50	2.309	TTACACCAGCGGACTCTCAG	59.866	55	0.134	147	2.442	AAAT	6
88914	GTGAGAGTTATGTCAGGTCGG	58.596	52.381	2.404	TGGCTGCCAGTTGAATGTAC	59.222	50	0.778	111	3.182	AAT	9
88936	ATGTTAGCAGGGACGTCAGG	60.223	55	0.223	TACAGAGACAGACGTAGGCC	59.007	55	0.993	101	1.216	ACGG	8
88991	ATTGCACTTGATCGCCTCTG	59.372	50	0.628	AGGAGTCCTACCAAGTGTGC	59.789	55	0.211	100	0.838	AC	21
89175	ACTCATTTAAGTGTGTCGTGGC	59.949	45.455	2.051	ACTTCTCCTCTCTTGGCTTCC	59.868	52.381	1.132	101	3.183	C	16
89192	ACGCTTAGACATCCACCTATG	58.023	47.619	2.977	TGGTTCCCTTCCACACCATG	60.662	55	0.662	133	3.638	A	12
89207	CCAACCTTGCAACATCACGG	60.783	55	0.783	CATAAACGCAATGTGGGCAC	59.108	50	0.892	139	1.675	A	10
89232	ACAGTGCTCAGTCAGTGTG	58.069	52.632	2.931	ATTGCTCGCCGGTCACATG	61.851	57.895	2.851	115	5.782	C	19
89486	CAGCTGGTGACTGGGAGTTC	61.077	60	1.077	TCCAAAGGAATCAGATGCCG	58.715	50	1.285	109	2.362	ACGG	6
89532	CCGCAGAGTAAATACGTTCCG	59.884	52.381	1.116	CGTTCTGCTGACGGATTGTG	60.291	55	0.291	126	1.407	A	12
89605	AAATCCCGGCTACTGTCCAG	60.224	55	0.224	AATACTTCACATGGCGCCAG	59.369	50	0.631	106	0.854	C	12
89718	TAGATCTGCGCTCTTCTGGG	59.722	55	0.278	TTCTTCACCCTCAAACTCCAG	58.276	47.619	2.724	104	3.002	C	15
89845	CGTTTGCACTTAACACACGC	59.610	50	0.390	TTGTGTTCGTGTGGTTGCTC	60.012	50	0.012	121	0.403	C	16
90084	TATTGTTTCAACGCGGGCTC	59.942	50	0.058	TAATCACGCCAAATTCGCCG	60.361	50	0.361	108	0.419	C	11
90089	ACAAATCCACTTATTCACACGC	58.333	40.909	3.667	CCCTTTGGCTAGTGGTGTTAG	59.05	52.381	1.950	109	5.617	A	10
90126	TGCCCTGTACGTGATCAGTG	60.507	55	0.507	GCTACACCCATTCTCGCCTC	61.28	60	1.280	133	1.788	C	18
90285	AACCGCGAACCCACAGAC	61.020	61.111	3.020	TGCGGAGAATTTCTTGAGTAGC	59.494	45.455	2.506	134	5.525	AACT	6
90365	ATGACTCTGACTCTGCAGCC	60.223	55	0.223	TCTCGTGTACTCCGCTGTTG	60.503	55	0.503	105	0.726	C	10
90470	TAACGTAACATTGAGGCGCG	59.738	50	0.262	CGCTTTGCATGCTGGATAAC	58.902	50	1.098	130	1.360	CG	9
91052	ACATAAACACACACCCGGTAG	58.711	47.619	2.289	AGCGACCTCTTGTTCACAGG	60.722	55	0.722	123	3.011	AC	9
91132	CTCTTCAGCCGAAATCAGCC	59.731	55	0.269	CTACATGTTGCGTGACTCAATC	58.49	45.455	3.510	131	3.779	A	10
91202	GCCCGAGTGCTACAGTTATTG	59.812	52.381	1.188	CCTCGAGGCCTTTAATCCAG	58.507	55	1.493	136	2.681	C	12
91298	TGCACTTATGACCTACTACTGC	58.375	45.455	3.625	GTATCGCCACATCTATCGGTAC	58.991	50	3.009	128	6.634	ACT	14
91303	TGTAGGGACAGTCTGAAGAAGC	60.207	50	2.207	CTGCCGTGCGTCTGTAGC	61.902	66.667	3.902	108	6.109	A	11
91531	CGTTTGTCCGTCCATCCATC	59.733	55	0.267	GAAGCAGCACGTACCTCTAG	58.542	55	1.458	144	1.725	ATCC	6
91532	AATTCCCTATCGGTTCCACAG	58.207	47.619	2.793	CCTTCCGGTTTGTAGCACAG	59.588	55	0.412	114	3.205	C	11
91789	ACAAGAGCGTGGTGAATCAC	59.234	50	0.766	GGGTTAAAGACGCGTTGGC	60.522	57.895	1.522	107	2.288	AC	13
91958	ACCTGACTTGTGTGTAACTGC	59.195	47.619	1.805	CTGTAAACTGCAGCACCAAG	58.045	50	1.955	130	3.760	A	14
92122	AAGTGACCCGTGTTCTTCG	58.455	52.632	2.545	CTACTGCAGGTGAGGTGAGG	60.223	60	0.223	109	2.768	C	12
92144	AGTGCTACTTCTTGCCTTTCTC	59.094	45.455	2.906	TGCCCACATTGTAACTTTCCC	59.525	47.619	1.475	142	4.381	AT	16
92320	CGTGCCTTAGTCTCCGTATC	58.334	55	1.666	ACGAGATTGATTGCTGCGTG	60.013	50	0.013	129	1.679	A	10
92358	TATAGCGCACACACCGTCTG	60.921	55	0.921	ATTATCTCTGGGTTGTGCGC	59.084	50	0.916	110	1.837	A	14
92375	GTCTCCAGCCCTTCACTTTAG	58.780	52.381	2.220	TGAGTACTTTCAAGGCGTGG	58.586	50	1.414	141	3.634	ACTG	12
92389	TGGTCAGTGTTGGATAGGGC	60.151	55	0.151	TCACAGACATAAGGACAGGGTC	59.943	50	2.057	123	2.209	A	10
92397	TGGCTTACACAGGGACAAC	58.037	52.632	2.963	GGAAACCTCGGAATGCCATTG	60.62	52.381	1.620	131	4.583	A	10
92410	CACTCCTTAAACTCAGGCGC	59.662	55	0.338	TCTTCGACTGCCTGTTCCTC	60.152	55	0.152	121	0.490	C	29
92476	TGACACACTTATCTTGCACCAC	59.622	45.455	2.378	CACTGAGACTTGCCATCGTG	59.664	55	0.336	105	2.714	A	12
92498	GGCCGCGTGACACAATAC	59.937	61.111	2.063	TTTCGTGCCTGGAATGTAGC	59.301	50	0.699	112	2.763	AC	8
92590	TTGTGGTTGGATTGGCTACG	59.224	50	0.776	CCATCCATCAGACATGCCTC	58.862	55	1.138	101	1.913	A	11
92595	CCGCTAGGCTTTGAAAGGG	59.264	57.895	1.736	CGTTGTGCAAGTACCTTCGG	60.222	55	0.222	111	1.958	C	10
92736	TCGTGGTCTGTACTAGGGTAAC	59.420	50	2.580	ACAAAGAACCATCAGTCAGGC	59.254	47.619	1.746	146	4.326	AAT	9
92743	TGGCTGGGTGATTTGTTTGTC	60.078	47.619	1.078	GCGGGATGGAAATGATGGTG	60.081	55	0.081	124	1.159	AG	12
92788	TCCACCTGATCTTCTCCATCC	59.376	52.381	1.624	CGTCTACCTCTACTGCCGC	60.377	63.158	1.377	148	3.001	ACT	22
92929	GGTTTGTGTTAATGGTGATGGG	58.574	45.455	3.426	TCACTTCCTCGCCTTCCTAG	59.286	55	0.714	105	4.139	A	13
93272	CGAACAGTGCAGAGCTCAAC	60.222	55	0.222	CTAAATCGGCCCAGTCTTGC	59.729	55	0.271	119	0.493	AC	25
93571	CATCACAGGGTTGCACAAGG	60.152	55	0.152	CTGCCTAGTCCAAACAACGC	60.222	55	0.222	124	0.374	A	12
93681	GGTATGGAGTGGTTGGTGGG	60.803	60	0.803	CCGGCTAACCCTTCCCAC	60.481	66.667	2.481	110	3.284	C	16
93906	ACATATACGTACATGCTTGCGC	60.270	45.455	2.270	ATGGATGCAAGGACGTACGG	60.932	55	0.932	134	3.202	ACAT	7
94150	TCGAGGAGTGGATGGTAAGG	58.990	55	1.010	CACAAGTATTCAACATCGCTCG	58.819	45.455	3.181	130	4.191	C	10
94234	GGTGAATCGAAACAAACCGC	59.048	50	0.952	TGAAGACATCGCATCCTCCG	60.647	55	0.647	115	1.599	A	11
94248	CTTCAACCAACTGCGCCATC	60.850	55	0.850	TGGGCGATTGGATGAGTGTC	60.867	55	0.867	100	1.717	ACAT	10
94558	CGCAATTTAGCCAGAAGTTTCG	59.575	45.455	2.425	AAGTTTCGATACTGCGGAGG	58.452	50	1.548	116	3.974	C	10
94744	GCCCATTACAGCAACACAAG	58.390	50	1.610	GAATGGTCAGGAAGTGCACG	59.942	55	0.058	127	1.667	A	15
94869	GTGTATCAGAAGGCAGTTGGTC	59.754	50	2.246	ATGTGACGCCGTGTAGTCTG	60.853	55	0.853	101	3.099	A	11
94907	TCCTCCATCATAGTCCAGTCAC	59.476	50	2.524	GGTTAACCGGTTTCTGCTATTC	58.14	45.455	3.860	117	6.383	A	11
95075	AGCTGGTAGGATGCATGGG	59.927	57.895	1.073	TCCCTTGTAAGTGCTACCGC	60.509	55	0.509	148	1.582	ACAT	6
95131	GCCTTATTCACCCTCTGCAG	59.081	55	0.919	CCCTCCATCACAGTCATAGC	58.215	55	1.785	101	2.704	AG	16
95807	TTCACCAAACATACCCAGGG	58.175	50	1.825	CCCAAACCCTCCCACAAC	58.563	61.111	3.437	129	5.262	C	12
95808	CTACTCGTTCCGTGACTCTATC	58.288	50	3.712	CACTGAAATCGGCTGGTGAC	59.942	55	0.058	104	3.769	A	10
95897	GGCAATCAGGGTTCGATTCC	59.726	55	0.274	TCGGTCGCTTCATATTCCGG	60.715	55	0.715	128	0.989	A	10
96091	TCCGCCGCAATGTTGATTAG	59.730	50	0.270	CTCATTCCGCCCGCTGTC	61.624	66.667	3.624	126	3.893	C	10
96368	ATGAATGGCCCGGCGAAC	61.574	61.111	3.574	TCTGCTTAACTCTTGTGTGGG	58.636	47.619	2.364	122	5.938	C	17
96417	GGCTTGTAGTAGAACCTGCG	59.100	55	0.900	CTTGCAAGGTCAGGTCAGTG	59.515	55	0.485	123	1.385	AG	11
96442	GGCTTGTAGTAGAACCTGCG	59.100	55	0.900	GCAAGTTCAGGTCAGTGTCC	59.516	55	0.484	120	1.384	AG	11
96751	CCTGCATACACTTCTCTTCTCC	58.969	50	3.031	GGAGAATGCGATGGATTGGC	60.152	55	0.152	106	3.183	C	14
96875	CCTGAGAACATGAACACGGC	59.942	55	0.058	GGTGACTGTCCGTTGTTAGATC	59.5	50	2.500	116	2.558	AT	19
96901	TGGGTAATGTGTAGGGTTTGC	58.971	47.619	2.029	CCTAGTACTCTCAGCGGACG	59.802	60	0.198	100	2.227	A	11
96953	ACCATCCAGACGCGGAAC	60.477	61.111	2.477	CAGCCGCCCATATGCCTC	61.415	66.667	3.415	102	5.891	C	10
97083	CCAACACGCCAATTCACATTC	59.414	47.619	1.586	AGCTTCTCAAGGACCGTACTC	59.941	52.381	1.059	142	2.644	AACT	10
97088	CAGCTCCTTTAAATGGGCCG	60.010	55	0.010	GATTGTCCTTACTCGGTTCCC	58.853	52.381	2.147	110	2.157	C	11
97138	TATTGCACCTGTTCACGCTC	59.306	50	0.694	CCTCTGCGACGGACTGATC	60.67	63.158	1.670	101	2.364	AC	17
97143	ACAGTGCACCAAACTTCACAG	60.011	47.619	1.011	CCCACCTATGTTCCCTGCG	60.907	63.158	1.907	100	2.918	C	36
97380	GCACCAAACACATATGCATAGC	59.374	45.455	2.626	TTCTCACAGTGCCACTCTCC	60.08	55	0.080	124	2.706	C	12
97656	GACCGGAGCGTTCGATGTAC	61.596	60	1.596	CTGAAGGTGGTGGCAGAAAG	59.511	55	0.489	143	2.085	A	11
97910	GTCTCAGAAAGTACCGCACAG	59.413	52.381	1.587	CATCTGCATGTGTCAGGGTG	59.657	55	0.344	117	1.930	A	11
98027	CCTGATTATGGCAGTCGACC	58.877	55	1.123	CTGCTTCATGTGGCTGGAAG	59.94	55	0.060	137	1.184	A	10
98097	GAGGAGGTTCAGAAGCCACC	60.797	60	0.797	CTCAGGAAGGACTCTGCTCC	59.936	60	0.064	119	0.861	AACT	18
98235	TGTGAAGTAATACTCCCTCCGG	59.744	50	2.256	GCGGGTGTTTCATTCGGTTC	60.847	55	0.847	125	3.102	C	15
98298	TCACTGGACCATATGTTGATCC	58.350	45.455	3.650	GGAGACCTATGAACAGACTGGG	60.339	54.545	2.339	108	5.989	A	10
98425	TGCAAGACAAGGGTGAACAC	59.366	50	0.634	GCGTGTATAGGGATTGCTTTAC	58.021	45.455	3.979	150	4.613	A	10
98506	TGTGGTGTTATCTGACGCAC	58.954	50	1.046	TCCGGACTTCTACTAATCGGG	59.184	52.381	1.816	102	2.862	C	13
98507	TTCCTCGTTATGGCCGGTG	60.531	57.895	1.531	ACGACCGGGCACTTATATCC	60.08	55	0.080	101	1.612	C	11
98654	CATGCCCTGGGAGTGAAGG	60.839	63.158	1.839	CCATCCGAGCTGCTCAAAC	59.643	57.895	1.357	116	3.196	A	10
98725	CGTTCGCTGTTCATACCGTC	60.085	55	0.085	TGTGGCCAGGACGTTACAG	60.382	57.895	1.382	119	1.467	A	11
98750	GCCCTCCTAGCTGCGATTTC	61.633	60	1.633	CGGCTGTGGTGCTAGAAC	58.852	61.111	3.148	102	4.780	C	12
98857	ACAAGATGCCTGAATGCTGC	59.938	50	0.062	TGCCACAGTAATGAGGAGACC	60.215	52.381	1.215	131	1.277	C	10
99184	TCGGGAGCTTGCTGTGTTAG	60.791	55	0.791	GACAGACTGCGTGTTCTTGG	59.874	55	0.126	101	0.917	AAT	12
99252	AGCGTTCTATATACAGCCTCAC	58.252	45.455	3.748	CCATCTTTACACTGCCCGAG	59.091	55	0.909	118	4.658	AC	25
99499	CCGAAAGATAGGCCGAAACAC	60.081	52.381	1.081	TGTCATCATCCCGTTGCATTG	60.011	47.619	1.011	115	2.092	A	10
99998	CTGTCGCGGCAGTGTATTG	60.014	57.895	1.014	GCCTTATCTTGGACAGGTGG	58.714	55	1.286	125	2.300	A	11
100000	CCGCGTTTACCTTTCCGATG	60.360	55	0.360	CCAACCTGAAGTGTGTACGC	59.873	55	0.127	148	0.487	C	15
100151	GAATGGACAAACGGATGGACC	60.011	52.381	1.011	GATGTTCGCGGGCTGTAC	59.326	61.111	2.674	105	3.686	C	19
100166	ACGGTTAGACTTATTCATGCGC	59.886	45.455	2.114	CGTACAGTTTGCTTGCATCAG	58.891	47.619	2.109	104	4.223	A	11
100332	TCGCGCAGACTCCAAATTAC	59.383	50	0.617	CGACTTCCGTGTAACATTGC	58.222	50	1.778	118	2.395	AC	22
100448	CACAGTTATTGCGATTGGGTAC	58.474	45.455	3.526	GCACTGTGTACCCTAGAAACG	59.41	52.381	1.590	139	5.115	ATC	9
100553	ACAGACATGGGTGCACAAAG	59.436	50	0.564	GTTACATAGACACAGGCGCG	59.808	55	0.192	105	0.756	AT	16
100805	GCCATTACGACAGACATGCC	60.083	55	0.083	TTTCGACCATTACGTGCAATC	58.008	42.857	2.992	116	3.075	A	12
100867	CAGCTATCTCACCTCTGCAG	58.235	55	1.765	TGCCAGCCATATGATTCACG	59.155	50	0.845	108	2.610	C	12
101499	CGCAAGGCTCCAACAGAC	59.471	61.111	2.529	GAGTCAGAAGAACAGGGTCC	58.001	55	1.999	132	4.528	AC	8
101542	GAAACTCCATGACTGCCCTC	59.010	55	0.990	ATTTCGCAAATCTAACTCACCG	58.149	40.909	3.851	132	4.842	A	13
101725	ACCATCCGTATAATTAGGCCG	58.156	47.619	2.844	TTATTATCCACGCCTTGCCG	59.16	50	0.840	112	3.684	AC	19
101794	GAGGCTCCTAGGTCACTCAC	59.650	60	0.350	CTAGGGCATGGATGTTCGTC	58.877	55	1.123	135	1.473	A	12
101925	GATAGACTGTCACGGAGAAGG	58.048	52.381	2.952	GGTTGGGTGGATTTCGGG	58.736	61.111	3.264	100	6.215	C	13
102330	ACTCATGACAACGGCCAGAC	61.075	55	1.075	CAGTCAGTCCGTCCGTCTTG	61.126	60	1.126	116	2.201	C	11
102957	CAGCCTGCGAAACAAGAATTC	59.150	47.619	1.850	AAAGCAGGCGTCGGTTTC	59.391	55.556	2.609	128	4.459	A	12
102993	GAACTTCACCTGTACCTTCTCC	58.834	50	3.166	AGCAGAAGGAGACGACGG	59.46	61.111	2.540	107	5.705	AAG	8
103345	CGCAGCGTCAAATTGTAATCC	59.292	47.619	1.708	TATCTCCTTTCCGCCACACC	60.224	55	0.224	138	1.932	A	10
103531	GGGAACTTCTTGACTAGCTGAG	58.904	50	3.096	GCACGTGGTATGATTGTTGC	58.836	50	1.164	124	4.260	AACT	7
103674	GGGAAATTGGGACGCGAAAG	60.573	55	0.573	ATTAGTGTTCCTCCGGCTCC	59.934	55	0.066	136	0.638	C	18
103805	CGTTAAGAAGGGAGCGTTAAGG	59.822	50	2.178	CGCAACTCAACCACACTAACC	60.481	52.381	1.481	112	3.659	C	11
104066	GTCCGTCCGTCCGTCTAC	59.935	66.667	2.065	CCCTCGTCAGCAAAGTATGAC	59.476	52.381	1.524	109	3.589	C	10
104276	GGTTCGAATCTGGACTCTGTC	58.866	52.381	2.134	AGATCTGGAAAGGTGCGGTC	60.51	55	0.510	123	2.644	A	10
104323	TCCCTGTCAGTACCATTCCAC	59.868	52.381	1.132	CCATCCAAGTCCATCATGCG	59.799	55	0.201	121	1.334	C	14
104417	GACAGGTTGCCTCCATACAAG	59.398	52.381	1.602	TGGATGTGAAGTCTTGGTGC	58.861	50	1.139	120	2.742	A	14
104621	CGGAAGTAAAGCAGCAGGTG	59.942	55	0.058	CATCGGGTAGGTTCAAGCTC	58.806	55	1.194	128	1.252	AT	8
104792	GTTCTACCCACGCCATTTCC	59.657	55	0.344	TTATGTATAGCCGCCGAGCC	60.507	55	0.507	116	0.850	AC	31
105072	CACGTGGTTTGATTTCGGTATC	58.743	45.455	3.257	CTCTTAGGCATTGCACCCAG	59.367	55	0.633	134	3.890	A	11
105358	GCTGAGATGATATAAGGCCCAG	58.894	50	3.106	CGACGTTCCATTGTTCCCG	59.941	57.895	1.059	141	4.165	AAAC	15
105391	TCATTCCTTCCGCGCCTTC	61.197	57.895	2.197	CACCTTCCTTACGTTTGGCC	59.869	55	0.131	104	2.327	A	10
105936	ACTCATACATGTTTCGCGCC	59.733	50	0.267	TGGTGCATGTTCCGGGTTAC	61.367	55	1.367	118	1.634	A	12
105952	ACTGACATACGCTCTTGGAGG	60.283	52.381	1.283	CCTCTAAGAACTTCCGTCAGTG	58.914	50	3.086	119	4.369	A	11
105987	AGCACCTTCAGTAACTGCAC	58.868	50	1.132	TGGATGTGGAGATGTAGCCC	59.64	55	0.360	125	1.492	AC	8
106084	TGTCTCCATTACCTCCTACGAC	59.483	50	2.517	AGTCCTTCGTTATTGTTGGTCC	59.093	45.455	2.907	133	5.424	C	13
106226	CGCCCTCACAACTCAGAATG	59.661	55	0.339	AGGTAGGAATGCAACAACACC	59.251	47.619	1.749	113	2.088	AAC	15
106721	GAGGACCCGGACTACAAATAC	58.306	52.381	2.694	GCGGGCGACACGTATTTATAC	60.279	52.381	1.279	124	3.973	C	14
107231	AACACCGCCTCAGTTCTAGC	60.792	55	0.792	CAGTGCTGTGACGTCGATG	59.655	57.895	1.345	103	2.136	ATC	8
107507	AGCTGGTGGTACGTAAAGTTAC	58.841	45.455	3.159	CCCAGCACTTACCGATTCTC	58.806	55	1.194	123	4.353	AG	13
107580	CGCTGTCATGACTACTAGCG	58.980	55	1.020	GGAGGAAACGCAAACCACC	60.084	57.895	1.084	107	2.104	C	12
108167	CTGTGAAGAAGAGGTCGCTG	59.032	55	0.968	GTTCTGACGTGTGCTCTTCC	59.596	55	0.404	103	1.373	AC	8
108352	GGTGATGGTGGTAGCAGC	58.515	61.111	3.485	CCACCTCTTCTGTTACTACTGC	58.907	50	3.093	128	6.578	ACT	14
108868	TGCCCTTTGTATGCTGGATAAC	59.483	45.455	2.517	TTCGCGTAACAATTCCTGCC	59.942	50	0.058	114	2.575	AC	17
108987	ATCGCACGTCAGACATGC	58.938	55.556	3.062	ATTCCATTCACAGCAACGCC	60.223	50	0.223	101	3.285	A	12
109031	CACGCACAGACTGGAAGTTAC	59.948	52.381	1.052	GGGCCTATTTCCGTTCCTAC	58.504	55	1.496	112	2.548	C	20
109120	TATCGCTTGTGAGTCGGAAC	58.467	50	1.533	ACATACAGACATACGCGAGC	58.616	50	1.384	111	2.918	AC	14
109433	GGGTAAAGGTAAAGGTGTCCC	58.691	52.381	2.309	ACCACACCTCCATCTAGTGC	59.862	55	0.138	109	2.447	C	10
109527	CGTGATGGGTCCGCGAAC	61.909	66.667	3.909	CTAGCCTCAGTGCTTTCTTTGG	60.012	50	2.012	100	5.921	AT	15
109676	GAGTGGGAGTGACAATCGGG	60.863	60	0.863	TTTGTGTCCCGCCTTCCC	60.642	61.111	2.642	138	3.504	C	27
109751	CTCTGAGTTTGAAAGTGTTGGG	58.196	45.455	3.804	GAGTTTGTTCTCCCTACAGCG	59.409	52.381	1.591	102	5.395	C	11
109967	CACCCTAGTTGTGCCACCC	61.061	63.158	2.061	GGAAAGCGCCAACCAACC	60.397	61.111	2.397	106	4.458	C	12
110141	TTAAGTGCGGCATCTCTCCC	60.581	55	0.581	GTGTTTACTCTTTCAGCCGGG	59.945	52.381	1.055	112	1.636	C	18
110191	ATCTGGGAGCCTCGACCTC	61.224	63.158	2.224	CCAGCTTGACCACGACTTTC	59.872	55	0.128	142	2.351	A	10
110328	TCGAGTGTGTCTAGTAGGCG	59.378	55	0.622	ACAGTCAAATGCAGTCCTCAC	59.26	47.619	1.740	121	2.362	AATT	6
110637	ATACACGAGGCCTCTAACGG	59.724	55	0.276	CAGATGCGTGAAATTCTCTGTC	58.486	45.455	3.514	119	3.790	A	11
110813	GCATTCCACTGATTCTGGTTAC	58.132	45.455	3.868	CCCAACCCATATTCTCCGC	58.73	57.895	2.270	100	6.139	C	23
110870	GATCGCTGCTGGTTCACG	59.634	61.111	2.366	TGATGTCTGGCTTATTGTTGGG	59.415	45.455	2.585	134	4.951	AAT	8
110895	GAGCATCGTTTGTCTGGCAG	60.292	55	0.292	CGCAGTCGTCAGGTCGTG	61.515	66.667	3.515	107	3.807	A	10
110937	ACCGTCAGTCTTCTCATTTAGG	58.306	45.455	3.694	ATTGAACTGTGGACGCTGTG	59.517	50	0.483	145	4.178	ACAG	9
111083	AACATCCCTCCTTCCCTTCC	59.484	55	0.516	TTCCCAACTGACTGTGCAC	58.656	52.632	2.344	134	2.861	C	14
111099	TGAATCTGGAACTGTGGATGC	59.048	47.619	1.952	GCAGCCAGGTCATTCAACTC	59.94	55	0.060	133	2.012	A	13
111232	TGCTGCAACCTGTTATGTGC	60.152	50	0.152	CACCCAATTCGATAACCTCCC	59.188	52.381	1.812	144	1.964	C	17
111265	CAGACCTACGCCTTAGACCG	60.363	60	0.363	AACTCACCACTCCTCGTTCC	60.08	55	0.080	138	0.443	A	10
111312	TTACGAGTGGTCCCTTTCCC	59.789	55	0.211	TATTGCCCTTCTGCCCAAAG	58.916	50	1.084	120	1.296	C	16
111403	ATCTGAAACAGCATGCAGGG	59.289	50	0.711	GCTTACATCAGTTTACCGGTGG	60.078	50	2.078	126	2.789	A	10
111507	TGGGTTGGGTTTCAGGCC	60.568	61.111	2.568	GTCTGTCAGTCCGTGTGTCC	61.062	60	1.062	136	3.630	ACAG	19
111600	AATGATGGATGTGGCTGTGC	59.650	50	0.350	CCAAGCGAAGTAGTCTGTTGG	59.678	52.381	1.322	114	1.673	A	10
111698	ACACACACAGAGTTAACGGG	58.516	50	1.484	TCCCTTGCATTTATACGTCGC	59.542	47.619	1.458	123	2.943	C	13
112039	GTGCTCACATGGCATCAATG	58.537	50	1.463	GTACCGCGCTGTAAACACTC	60.016	55	0.016	118	1.479	A	10
112051	TGTGCTGCTGTTATCTTTCTGC	60.271	45.455	2.271	GTGATTTGGGCATTTGGTTGG	59.331	47.619	1.669	116	3.941	A	10
112151	GGTTTCCTTTCGGTGGTTCG	60.152	55	0.152	TTCCAACACGCCATACAACC	59.512	50	0.488	138	0.641	C	20
112198	AAGCATAACCACATCAAACTCG	58.069	40.909	3.931	TCTGCTGAGGATCCAACCAG	59.861	55	0.139	104	4.070	C	13
112224	AGTGTTGAGTGTCGTCAGGG	60.366	55	0.366	TTTGCAGCATATCATCACACTG	58.129	40.909	3.871	114	4.236	AC	12
112330	AAACTGAGAACGAGGGACCG	60.436	55	0.436	GTACGACCTCCACCGCAG	60.549	66.667	2.549	125	2.985	C	12
112373	GTCTTCCTGGTAAGTGCGAAG	59.409	52.381	1.591	CTACTTGGCTGGTTGGGTAG	58.354	55	1.646	116	3.237	AACC	8
112421	TCAGCAGCTCCTTCCGATTC	60.580	55	0.580	GCCACTCTTTGTTTGTGTTGG	59.207	47.619	1.793	110	2.373	AC	25
112517	TCACAAACATTTCGCCGGAC	60.152	50	0.152	CCTCTGCCTCATATCCTCCG	59.865	60	0.135	129	0.288	C	22
112678	ACCACTCAGTTTCATGCATGG	59.598	47.619	1.402	CTTTGGGCTGGTTGAGATGG	59.578	55	0.422	132	1.824	AG	12
112907	AGAAGTCTCCGCAGTCGC	60.164	61.111	2.164	TCCTTTCTGACACAGCCTGG	60.368	55	0.368	129	2.533	C	16
113149	GGGTGTTAATGAGGTAGGCG	58.801	55	1.199	CTCGTGACATGTGAGTTCGG	59.391	55	0.609	124	1.808	A	10
113166	GCAGTACAGGCCACACAAC	59.790	57.895	1.210	CTGGCTCCATCACAGAACTG	59.015	55	0.985	134	2.196	A	11
113465	TCACCATGCCAGCAAAGTTC	59.795	50	0.205	CCGGTACTCCTGCCTGTAAG	60.294	60	0.294	107	0.500	A	11
113646	GTGATGTACGGTTGCAAACTTC	59.190	45.455	2.810	CTGAACTGTGCTGCTGTCAC	60.153	55	0.153	141	2.963	ACAT	15
113817	CAGAATGCTCCAGACGTGC	59.647	57.895	1.353	TCTCATGCGTCCCAACCC	60.084	61.111	2.084	103	3.437	AC	24
113932	ACGACACCTTAAGAAACGGC	59.238	50	0.762	ACTTCCCTGGTCTGTCTGTC	59.425	55	0.575	144	1.337	A	10
114379	CATGCAGCCTAAACAACGC	58.706	52.632	2.294	TCTCATTCAATGGTTCCTTCCC	58.809	45.455	3.191	126	5.486	AC	8
114725	TGCACCATTAACAGTACGCG	59.665	50	0.335	GGATTTAGTTACAGCTGCCTCG	59.885	50	2.115	146	2.450	ATC	8
114885	TGACCAATACTGCCACTATACG	58.444	45.455	3.556	AACGCCCATCTTCTTTCCTAG	58.495	47.619	2.505	130	6.061	ACGC	7
115080	CTGATTCGTCGAGTGTTCCC	59.106	55	0.894	CCGAACAAAGGGCCAAGTG	60.084	57.895	1.084	113	1.977	A	12
115151	AAGGTGAAGTTAGCCCTGGG	60.078	55	0.078	AAAGGCGCCGAACATTGAC	60.158	52.632	1.158	137	1.236	C	14
115200	CAGAAGCGTGAATACCCTGC	59.732	55	0.268	TAGACTGCGCATTGTGACAC	59.312	50	0.688	137	0.956	ATC	8
115284	CAGGCAGACACGTGTAGAC	58.622	57.895	2.378	AAAGGCGTTGCTTCTCTGTC	59.516	50	0.484	134	2.861	ACAG	8
115407	GGTGGGTGCTGACATTTCTG	59.868	55	0.132	CGTCCCTCCCAGTTCACTAAG	60.555	57.143	1.555	145	1.687	ACC	8
115431	ACCCTGAAGCTGACCTCAAC	60.368	55	0.368	CCTGTTGTGTCTTGTGTCAACC	60.657	50	2.657	102	3.026	C	17
115452	CTTAAGGCTGAGGTGGGTCC	60.513	60	0.513	GCCTCAATCAACTGCGACAC	60.569	55	0.569	115	1.081	A	10
115741	CCACTGAACACGATCCTCAAC	59.678	52.381	1.322	CGGAGTCGCATCAGAAGG	58.316	61.111	3.684	123	5.006	A	10
115807	ATTACAGACCGCGGGACAG	60.232	57.895	1.232	GTGCAGTTCTGATGTGTCGG	59.944	55	0.056	113	1.288	C	16
115866	GGTTCGATGTCTGTCTCGTG	59.113	55	0.887	ATTGAACCCAGACACCGAAC	58.863	50	1.137	119	2.024	AAG	10
115999	CGTCTTAGTTCTATGCGAGCG	59.690	52.381	1.310	ACGTCACATTCTTCTGTCGC	59.317	50	0.683	121	1.993	AC	20
116567	GCCTAACTAATTCACAGCGCAG	60.716	50	2.716	GGGTCCCTGCTCTCTTAAAG	58.059	55	1.941	145	4.657	A	11
116851	GCGACTGAGCCTATTGTGATAC	59.695	50	2.305	CTGTTAGCTTCTCAAGTAGGCG	59.566	50	2.434	101	4.739	AACT	10
116902	CTGGTGTCAAACTGCTGTCC	59.799	55	0.201	GCAGCCAATAACATGTGAAGC	59.211	47.619	1.789	129	1.990	C	10
117676	TAGGCGGTGCGATTTAGGC	60.973	57.895	1.973	GCCTTGTCCAAACTCTCTGC	59.87	55	0.130	124	2.103	A	11
117835	TTGTCCGTGTAAGTGCCATG	59.231	50	0.769	CGTGAAGCTGACCATTGACG	60.291	55	0.291	127	1.060	AC	11
117938	AGGACCCTGCTTCATGTAGTC	59.938	52.381	1.062	ACCAACCATGTAATTGCCTGAC	59.944	45.455	2.056	128	3.118	AACT	10
118061	CAAGTTCTTGCGCGATCTAC	58.021	50	1.979	GCTTACACACTGCTGCGG	59.859	61.111	2.141	117	4.120	ATC	10
118166	TGAGTAGAATGCTGGGTGGG	59.860	55	0.140	GGTGTAGTGACTAAGCTACGGG	60.659	54.545	2.659	127	2.800	A	12
118667	GCAGACCCACGCCTTAGAC	61.191	63.158	2.191	ACCCAACTATATCATCCGCCC	60.146	52.381	1.146	100	3.336	C	15
119009	TTAGAACTGGCAGTGAAGGC	58.572	50	1.428	GGGTATCCGGTCTCTTTCCC	60.007	60	0.007	137	1.435	C	10
119104	TGGCGTGCGTAATAGGAATTG	59.811	47.619	1.189	CAACACCTAGATGCACGCTG	60.013	55	0.013	100	1.202	C	12
119272	GAAGGCGAGGGTTACGAATG	59.452	55	0.548	CCAGCTCCCTCCATTCCC	59.841	66.667	2.159	105	2.706	C	12
119487	CTGCCCTGACACACGCAG	61.778	66.667	3.778	ACACCACATCCCTGATAGCC	59.932	55	0.068	119	3.846	C	10
119542	TGTCTTTCACTCAGGTCTCCC	59.800	52.381	1.200	TGGTGGTCACGGTGTACAG	60.008	57.895	1.008	114	2.208	AC	13
119637	TTACCGCATTCACAAGAGCC	59.301	50	0.699	CGTCTGACACACCACATCTTC	59.681	52.381	1.319	106	2.019	C	11
119703	CGGTAGAACAAGAAACGAATGC	59.005	45.455	2.995	GTTGCGTTTCCCACCCAC	60.009	61.111	2.009	102	5.004	C	11
119866	AAGTGCATCAAACGGTGCG	60.450	52.632	1.450	CAGCCTCTGGATCGACATTTG	59.811	52.381	1.189	121	2.639	AACC	6
119912	ACTTTCTGAATTCTTCTGTGCG	58.012	40.909	3.988	GACGTGGAATGCAAGCAATG	59.112	50	0.888	112	4.876	A	10
120066	TGCGCTTAAATGTTCCCTGG	59.581	50	0.419	ACCATGTTAGTTCATCTGCCTG	59.154	45.455	2.846	139	3.265	A	11
120096	CTCCTGGAACTCTAAGGGCC	59.934	60	0.066	CGAACAAGCCGCTGTTACG	60.586	57.895	1.586	145	1.653	A	11
120370	ATGACGGGCTGGGAGTATAG	59.134	55	0.866	TGCCAAATGATTACCTGTCGAG	59.491	45.455	2.509	137	3.375	AC	18
120376	GGTGAGTTTCCGGGCAAC	59.385	61.111	2.615	GTGTTGTGGTATGGTTCGTCC	59.946	52.381	1.054	111	3.669	A	10
120516	CCACCTACAGACAATCAAATGC	58.393	45.455	3.607	GAGTGAGGCTTTGCGGAAC	59.865	57.895	1.135	104	4.742	A	13
120801	GTTTCGGTGTTCTGCGTTGG	61.049	55	1.049	CTTTGCTGCTTCCTGGTTCC	60.152	55	0.152	104	1.200	C	20
120891	ACTGATCACGTGAAATTGGCC	59.943	47.619	1.057	TGGCGGCAAATTAAAGTGTC	58.029	45	1.971	100	3.028	A	11
121340	GGGTGTGGTATAAGGATGGTAG	58.152	50	3.848	CACCACCGGCCCTATATCTC	60.152	60	0.152	132	3.999	A	10
121526	TCAAGAAGCGACAAGAAGGAC	58.996	47.619	2.004	GTCCTTTCGAGACACTGAGAC	58.808	52.381	2.192	101	4.196	A	11
121607	GTTTCAACACGGATGCTCAC	58.416	50	1.584	TGATTACGGCGCATTTGACG	60.36	50	0.360	145	1.944	A	10
121691	TTTAATGGCGCGCTCAGTTG	60.570	50	0.570	GAAGAACTACCGGGCCTACC	60.295	60	0.295	143	0.865	ATCC	6
121700	TTCAGCCTCACGAACCGG	60.398	61.111	2.398	GCCTCGTGACCTTTCTCTCC	60.859	60	0.859	122	3.257	C	12
121818	AATGAGTGGACTGTGCGTTG	59.517	50	0.483	AGCACTCAAGATGAAAGTACCC	58.824	45.455	3.176	105	3.659	A	11
122144	GAAGGATCAGGGTGTCTTGTC	58.780	52.381	2.220	CCATGAATTAGCCCACCACC	59.359	55	0.641	125	2.862	A	10
122329	TGTTTCCGTTCCAAAGTGAGG	59.465	47.619	1.535	CTTGTGTCATCGTCCTTCCG	59.386	55	0.614	138	2.149	C	10
122552	TGAGGCAGGGAACATAATGTAC	58.620	45.455	3.380	CAGTGAACGCCCAAGAACAC	60.431	55	0.431	102	3.811	A	14
123287	GAAATTGCGATTCGTAGGCAG	58.760	47.619	2.240	TAGTTGGTCGGTTGGTCAGC	60.722	55	0.722	133	2.962	ACTG	15
123405	TGGGTAATCAAGGCTACACAC	58.421	47.619	2.579	GTAACATTGAGGCGCGTTTG	59.123	50	0.877	134	3.456	AG	10
123422	CTTTCTTTCTTCCGCCTACCC	59.399	52.381	1.601	TGTCTTACCCAACGAATGCC	58.938	50	1.062	124	2.663	C	12
123433	GAACGCACATTAAGGCACATG	59.219	47.619	1.781	GCACCCATACCAGTTTGATCC	59.737	52.381	1.263	104	3.045	AC	8
123449	CATTCGCATTTACACAAGCTCC	59.315	45.455	2.685	ACGTCTTCTGCTATTCCTAACG	58.722	45.455	3.278	130	5.963	AC	8
123626	CGCGCCTTCTATGCAATGG	60.449	57.895	1.449	TTGGGCACAACTGAATGGG	59.016	52.632	1.984	105	3.432	C	20
123745	GCTATCCGTATTGCCACATAAC	58.085	45.455	3.915	CTCCGGGTTCCATAAATGCG	59.8	55	0.200	130	4.115	ACTG	6
123911	GGGAGGGAAGGAGTGGTG	59.357	66.667	2.643	CCCACAAACCCAAGAACCAG	59.72	55	0.280	113	2.922	C	12
123999	TGTCTCCGGTTACCAAGTCC	59.791	55	0.209	CGCAAACGCAGAAGAACAAC	59.608	50	0.392	118	0.601	A	12
124655	GGGATATTTGAGAACAGGGTGC	59.814	50	2.186	CGAACGGTTCCAGGTTCAAC	60.153	55	0.153	121	2.339	C	16
124899	TAGCGGCACTTCTACTCTGC	60.294	55	0.294	TTCTGAAGAGGCTGTTGGTG	58.497	50	1.503	103	1.796	A	11
124901	ATGGGTGTACGCCTACCTTC	59.935	55	0.065	GCATGGTGTCACATCTGAGC	60.012	55	0.012	125	0.077	A	11
124959	AAAGTGAGACAGACTGGGATG	58.073	47.619	2.927	AACCAGCGACGCATCAGG	61.172	61.111	3.172	129	6.098	C	10
124992	TGTTGCGCCACAGAAATACC	59.869	50	0.131	GCCTTCCGCTTAGACCTAAC	58.809	55	1.191	123	1.322	AC	14
125483	CAGTGCCTCAACCAACTGC	60.084	57.895	1.084	GCTACGGACTCACTCTAGCC	60.082	60	0.082	144	1.166	AAT	16
125654	GTTCTTGGTTCGCGGTCTG	59.868	57.895	1.132	GCCGACCTGTCAGTTTATTGG	60.012	52.381	1.012	125	2.144	C	14
125796	ATCCGACTCTCTGCTGTAGG	59.073	55	0.927	GTTCAGCTCGACATGAATTGC	58.957	47.619	2.043	105	2.970	AC	29
126124	ACACCTGATCACACTCAATGAC	59.095	45.455	2.905	ACAGAACTCTAGGACAGGACG	59.324	52.381	1.676	108	4.581	AC	8
126161	TGTTATTCAGCAGAGCCGATC	58.927	47.619	2.073	ACACCCAAGCAAATTCCTTAGC	60.207	45.455	2.207	148	4.281	A	10
126227	TAAGAGTCGTGGCAGCAAGG	60.791	55	0.791	TTTGCAATCCGGTTCAGGG	59.102	52.632	1.898	100	2.689	AC	15
126293	ATAAAGCCTCGGACCTGGAC	59.934	55	0.066	ATTCACCTGTCCCGATCCTG	59.934	55	0.066	140	0.132	C	11
126364	AGACGGCGTTAGAATATTGAGC	59.370	45.455	2.630	TCAATATTCTTACGCCGGCTAC	59.108	45.455	2.892	100	5.522	AT	8
126374	CGATAGTTGTCAGCCCGTGG	61.549	60	1.549	GTGTAGGTCGTCGTGGTAAAG	59.15	52.381	1.850	133	3.399	A	10
126492	AATGTTGAATGCGGCCTGG	59.858	52.632	1.142	AATGCCACAACATGCCATCC	60.223	50	0.223	127	1.365	C	10
126553	AGGATAAACACTGCATGGGAG	58.482	47.619	2.518	TCCAGTACCTAAGTTACATGGC	58.022	45.455	3.978	102	6.496	A	12
126615	GCCTTCAGTATGTTAGCGGTG	59.812	52.381	1.188	AATCTGGGAGCCTCAACCTC	59.859	55	0.141	103	1.329	A	13
126705	AAGCTGTCTTTGTGCACGC	60.377	52.632	1.377	CTCTTGCCCGTAATGAAGCG	60.083	55	0.083	119	1.461	C	10
127107	GGCAGACAGGTATTTATTTGGC	58.450	45.455	3.550	CTGACTAAACAGCCAACGAAC	58.217	47.619	2.783	106	6.333	AATC	12
127258	TGACCCAGACTTTCATTTGGC	59.527	47.619	1.473	GTGTGTGTCATTCCTGGTGG	59.513	55	0.487	132	1.960	C	14
127267	CGTGTTTCTCAATTATCCGTGC	59.068	45.455	2.932	CCCAACACAAACCTTCACCG	60.364	55	0.364	100	3.296	C	18
127367	CTCCCACTATTCCCTTGCTC	58.131	55	1.869	ACTAGATTTGCTGCAGAAGTGG	59.422	45.455	2.578	117	4.447	AG	10
127390	ACCGGTCTATGTGGCATTAC	58.141	50	1.859	TAATTACAGGCGTTGCGTCC	59.38	50	0.620	108	2.479	C	14
127392	ACCGGCCTGTCTATTCTGTG	60.223	55	0.223	GCTGTCTGTTAAACTCGGGTG	59.947	52.381	1.053	107	1.277	ACAG	6
127464	ACTCCACATCGTACCCTCTG	59.286	55	0.714	GTGTTTATGGAGCCGGCTG	59.641	57.895	1.359	140	2.072	AC	23
127742	TGTTTCAGTGCCTTCGTGTG	59.730	50	0.270	CAAGGCCCGCACTCACAG	61.789	66.667	3.789	123	4.059	AC	8
127831	AAGACTAAAGCAACAGGGTCAC	59.289	45.455	2.711	GGTCAAGTGTCAAGTCTAGCG	59.413	52.381	1.587	100	4.298	A	10
127856	TTGTGTGATGATCTGGACGC	59.021	50	0.979	TGAGACCCGACTGCACAC	60.007	61.111	2.007	142	2.987	AC	36
127908	ATGGAAAGTAAAGTGGGCGG	58.926	50	1.074	TACCTCTAACGAACCGCACC	60.223	55	0.223	119	1.296	C	11
128176	TACTAACGACCCAGGGCTAC	58.995	55	1.005	ACACTATGTTACTGCTGTACGG	58.65	45.455	3.350	100	4.355	A	10
128261	TCACCAACTGATGTGCGTC	58.826	52.632	2.174	TTTGACTGGCTTTAGGACTACC	58.488	45.455	3.512	102	5.685	AC	19
128278	AGATGGAAAGGTCGTCAGCC	60.510	55	0.510	ATCCCTTCGGTCACAGATGG	59.934	55	0.066	117	0.577	A	10
128280	TGCTGGCAAAGGTGTTTCAG	60.009	50	0.009	TGTAAACGACGTCTCATTTGGG	59.692	45.455	2.308	101	2.318	AC	8
128605	TCAGAGGAACCTGCTGCTTC	60.439	55	0.439	CATTTATGTTGCCGCCGC	58.721	55.556	3.279	112	3.718	C	17
128656	GCAGGAAACCCACTTGTGC	60.380	57.895	1.380	TGACCAAGTTCCTCCTGTTG	58.124	50	1.876	125	3.256	A	11
128741	GTCGCTTTACACCGGTGATC	59.737	55	0.263	AACGCGCACAGATCTTACAG	59.386	50	0.614	119	0.877	A	10
128768	GGAGAGCAATTACACAGGCG	59.732	55	0.268	CGTCTGTGGCTGCACTATCC	61.552	60	1.552	100	1.820	AAG	11
128831	AAGACCCAGGAAGACAGAGG	59.124	55	0.876	GAATATTCACTGCCCGCCAC	60.082	55	0.082	124	0.958	C	12
128945	TCACCAACTGATGTGCGTC	58.826	52.632	2.174	TTTGACTGGCTTAAGGACTACC	58.488	45.455	3.512	102	5.685	AC	19
129223	CATCCAGCACTGTTCTAGGC	59.088	55	0.912	AGTTGTTGACATAGCCTGCTTC	59.685	45.455	2.315	130	3.227	AAC	9
129226	CACAGCCTCATGTTCTATCTGC	59.884	50	2.116	CTATGGAAGTCGCTTTGGGTG	59.742	52.381	1.258	124	3.374	C	11
129523	CGTCTTCCTTCGAACATGCC	60.014	55	0.014	GCCTAACACTGCACAGCTC	59.57	57.895	1.430	107	1.444	ATC	12
129841	CGTTAGCAGCAGTACAGTGAC	59.751	52.381	1.249	TCGCAACATGGAGAGCAAAG	59.587	50	0.413	110	1.662	C	11
129887	AGGTGTTAGTCTTTAGTCCACG	58.245	45.455	3.755	GTTTAACCCGCCAGCAGAAG	60.223	55	0.223	117	3.978	AC	13
129913	TGCAGACCACACACAGTTAG	58.512	50	1.488	ATTCAGCGAGTCCTAACGGG	60.294	55	0.294	104	1.782	AC	31
130179	AGACCGAATCCAGATGCACG	60.929	55	0.929	CCGCCTGACAGTTGAAAGAAG	60.214	52.381	1.214	142	2.144	AC	28
130244	ATGAGCGCGTTTCAGAAGTG	59.944	50	0.056	ATGATTCTCAGCACCGCCTC	60.936	55	0.936	146	0.992	A	10
130375	CCTGGTGTGAACATGTGCAG	60.152	55	0.152	TTTGGAACGTTGCTTCCTGG	59.725	50	0.275	126	0.428	AAG	9
130394	GCGAAGTTTAAAGTTGGGCAG	59.080	47.619	1.920	CATAAACGCAATGTGGGCAC	59.108	50	0.892	127	2.812	A	11
130398	ATGTGCCACAACCTTAGTCC	58.562	50	1.438	CCTGCTGGTCAAAGTCCG	58.763	61.111	3.237	131	4.676	C	15
130528	CGCCTATAAATTCCAAACTGCG	59.125	45.455	2.875	CAACTTTAAGATACGTCACGCC	58.497	45.455	3.503	100	6.378	A	10
130533	GATCGAACCCTGGCTTTCG	59.351	57.895	1.649	TGTTCATACCGGAGTTCACTG	58.443	47.619	2.557	121	4.206	AAT	12
130565	GAGTGAGTGGTTGGTTGATCG	59.678	52.381	1.322	TCGATCAAACAACCAACCACTC	59.883	45.455	2.117	118	3.440	AACC	8
130654	CCAAGCAAGGGTGTATTCATTC	58.383	45.455	3.617	ACAGACGCACATAAAGAGTGG	59.064	47.619	1.936	119	5.554	AATG	6
130760	ACTCAGCAGTTGTAGGCATG	58.649	50	1.351	TCACATGGCTGCCTCACTC	60.459	57.895	1.459	129	2.809	ACTC	6
130840	CGAAATCCCGATCACAGCG	59.797	57.895	1.203	TCTTCATCTGCATCACCGGG	60.582	55	0.582	136	1.785	A	12
131256	ACCCTGTGACGAAGGTGATC	60.152	55	0.152	GTGGACAAAGTGACACTGGG	59.442	55	0.558	128	0.710	A	10
131323	GTCATTTATTTGGTGGCAGCAG	59.239	45.455	2.761	GACTGCTTGTGGAAGGAAAGG	59.875	52.381	1.125	104	3.886	AC	13
131361	GAGTTCTTCAGGAGGTGTCAC	58.721	52.381	2.279	ACTTCAACCCATGCCTCCTG	60.733	55	0.733	101	3.013	A	10
131459	ACGAAGAACAGGAAGTGAACAC	59.560	45.455	2.440	CACAACGGGATGGGAAACAC	60.152	55	0.152	131	2.592	A	10
131548	ACGTCAGGGCCATTCTAGTG	60.223	55	0.223	CAGCAACTTAACTCAGTCACAC	58.286	45.455	3.714	133	3.937	AT	12
131795	GCTGTCACTTACTGTAGCGAC	59.485	52.381	1.515	TCTGGCCTTCAAGTACTCTGAC	60.207	50	2.207	135	3.722	A	10
131818	AGTGCCAGGGAAAGAGTTGG	60.660	55	0.660	AGCTGGATTTCTGAAATGGCC	59.663	47.619	1.337	135	1.997	AT	11
131935	AGTCCAATTTGAAAGGACTCGC	59.947	45.455	2.053	GTACTCACTTCTCACTGGTGC	59.07	52.381	1.930	131	3.983	AC	16
131935	GTACTCACTTCTCACTGGTGC	59.070	52.381	1.930	CCAATTTGAAAGGACTCGCAAC	59.439	45.455	2.561	128	4.491	AC	16
132003	CAGGATGGTCACCTTTAAGCG	59.742	52.381	1.258	ACTGCCCTGTATATATGTCACG	58.242	45.455	3.758	100	5.016	AC	22
132082	ACCCTCGAATGCATAGAAACC	58.843	47.619	2.157	CGGAAGTGACGACTAGCTTG	59.113	55	0.887	100	3.044	A	10
132399	AAGCAACGTGAGCAGTTACG	59.875	50	0.125	TGCACTTCCTCACTTAACAAGG	59.289	45.455	2.711	128	2.836	AAG	22
132495	CCTGCATCTTCATCCCTTTCAC	60.077	50	2.077	ATACACCTACGTCAACCCGG	59.937	55	0.063	108	2.139	A	13
132628	CCAACTTGGGCCTAGGGTG	60.766	63.158	1.766	CAGAGTATCCCTACCGGCTC	59.507	60	0.493	108	2.258	AC	23
132632	GCAAACTCAAGAAACGCACC	59.254	50	0.746	GCTGCCAGAGTCCATAATACC	58.986	52.381	2.014	107	2.760	A	11
132667	AACCCGTCAGTGCATACAAG	58.942	50	1.058	TCTTTATCCCGCATCCACCC	60.296	55	0.296	117	1.354	C	11
132692	ACAGGCTGGTTACTACAGGG	59.495	55	0.505	GCTTTGCTACCATCCCATGC	60.365	55	0.365	129	0.870	A	10
132826	GCAGGGTCGAAACATGTAGG	59.376	55	0.624	AACGCCGCGAAATATTCCAG	60.083	50	0.083	116	0.707	AC	8
133024	CTCCTCTTCAGTCCTGTGGG	59.863	60	0.137	TCCACGGAAGATCTGAAGGG	59.571	55	0.429	130	0.566	AC	9
133030	TGTTGCACGCACCTAATCAC	59.871	50	0.129	CGCCATTCAGATCACTCGTTC	60.148	52.381	1.148	101	1.276	AC	19
133372	TCAGAAGCGCAGACTGTATTC	58.867	47.619	2.133	CAAACCGCCACGCATCAC	60.846	61.111	2.846	100	4.979	C	13
133381	CCTACCACTCACGAGGACAC	60.223	60	0.223	TCTACAAGCACGCAGACAG	58.239	52.632	2.761	144	2.983	AC	15
133590	GCCTGAGCCATGGTACGG	60.946	66.667	2.946	ATGGTGGAGGGTGATTCTGG	59.857	55	0.143	108	3.089	ACT	19
133592	TCTGTGTACATCTGCAGCATAC	58.972	45.455	3.028	GACAGTCCTTGCCTACAACTG	59.335	52.381	1.665	145	4.693	AC	18
133662	GAGACTTTGTTCGCAGGGAG	59.309	55	0.691	ACATGTACCCTGTGACACCC	60.079	55	0.079	117	0.770	C	18
133786	CTATTTCTGGCGGTCGTTGG	59.733	55	0.267	TCATCTCTCTTGCCCGACAC	60.223	55	0.223	140	0.490	AC	16
133787	TCCAGTTCCCGTATCTTGCC	60.224	55	0.224	CTTGCTGGTAGTTGCTGAGC	59.942	55	0.058	110	0.282	C	19
134147	TCGGCTGAAGGGTAAATCATG	58.844	47.619	2.156	TATGCAAGGGAGAGGCTGC	60.233	57.895	1.233	126	3.390	C	14
134240	CAGTCCACTTAGCCAGCAAG	59.302	55	0.698	TTAGTCGTCGTCTTCAGGCC	60.223	55	0.223	132	0.921	ATC	12
134828	CCGCTGCTTCCACTTACAAC	60.222	55	0.222	GCACAACCCAACTTATGACTTC	58.592	45.455	3.408	117	3.630	A	10
134850	TAAGGGCAAGGAGACACGAC	60.152	55	0.152	AACATTACCATCGAGTGCCC	58.718	50	1.282	116	1.434	C	18
134961	GGTTGCACAGTAAGCCTCAAG	60.214	52.381	1.214	GGCCTAATCATCTACGTCACG	59.079	52.381	1.921	118	3.135	A	10
135210	ACATTCATCTACCCACCCACC	60.216	52.381	1.216	GCGGGCACAGGTAGGTAG	60.242	66.667	2.242	114	3.458	ACGG	6
135571	TTCTCACGAAGGGCTCTGC	60.456	57.895	1.456	ACTAACTACCCATCCACCCAC	59.585	52.381	1.415	112	2.871	ACCT	9
135687	TTGTGCAACCCTGTGATGAC	59.437	50	0.563	TGTGGTGGTCAAAGTGGTAC	58.423	50	1.577	117	2.139	A	12
135691	TTCCTGCAGCGTCGTGAC	61.085	61.111	3.085	TCTCTCATTGCCTTCCCACC	60.151	55	0.151	116	3.236	AAAT	6
135735	TCACGAGTGGTCAGCTTCAC	60.717	55	0.717	AGGTTCAGCAGTCCATACCG	60.223	55	0.223	131	0.940	C	14
135783	ACACAAATTTCTCCACCTTCCC	59.544	45.455	2.456	TCTGGCGTTAAGGAGCAGAG	60.223	55	0.223	137	2.679	AG	8
135872	GGAAATGCACTTATGGAAACCC	58.638	45.455	3.362	CCCACTCTACAGTTCTCCCG	59.938	60	0.062	138	3.424	AC	34
135921	AAGTACTCGGCTGCATGGAG	60.580	55	0.580	GTCCGATCCTGAAGCAGTTC	59.097	55	0.903	126	1.483	AACC	9
136010	CGCGTGGTTGAGGTTTCTAG	59.666	55	0.334	GCGTGACGAGCTGATCAC	59.335	61.111	2.665	137	2.999	AC	31
136357	TGCCAATGAAGTTACCGTAAAC	58.002	40.909	3.998	ACTCTAACAATACGACAGGCAC	58.91	45.455	3.090	118	7.088	C	11
136776	GATCATTCAGACTGGCGCTG	59.803	55	0.197	CCGAACCATCCGAACAACAG	59.943	55	0.057	100	0.254	C	10
136881	ACGTACTGTGAACAAGCAGG	58.880	50	1.120	CTGATGGTCTGTTTGCACCC	59.868	55	0.132	101	1.252	A	13
137135	ACTGGCGTGAAGTGACTGAG	60.718	55	0.718	CCATTCACTTGCGTACGGTG	60.291	55	0.291	111	1.009	C	11
137390	TAGAAGAGGGAAGGACTGCG	59.286	55	0.714	ACTCTCTATTACGTGGCAGTTC	58.385	45.455	3.615	100	4.329	A	10
137425	TAGAAGAGGGAAGGACTGCG	59.286	55	0.714	ACTCTCTATTCCGTGGCAGTTC	60.599	50	2.599	100	3.312	A	10
137553	CGTGCTCTGCTGAACTGTATG	60.081	52.381	1.081	CGCTCACACAAACGCCAG	60.467	61.111	2.467	148	3.548	AC	29
137709	TTCACGGCTAGCTCCTTCAG	60.223	55	0.223	ACACTGACATGCACAAGGAC	59.155	50	0.845	120	1.069	A	14
137813	TGAAGTAGCACTGGGAGAGG	59.206	55	0.794	CCGTCCGGTCCACAATTAC	58.979	57.895	2.021	120	2.815	C	11
137888	ACGTCTAACAGAAACGAGTACC	58.598	45.455	3.402	TACACAAGCGGCACATTCAG	59.589	50	0.411	108	3.814	C	15
137986	AACATGTTTAGTGCGAGCGG	59.943	50	0.057	CGCACGGTGTAGAGTATTTGC	60.411	52.381	1.411	146	1.468	AC	18
138041	TACACCGCTTCAGAACAACG	59.244	50	0.756	CCTACCACCCAACCTGCTG	60.762	63.158	1.762	128	2.518	ACT	13
138533	TCGTCGTCATTGTTGCTGC	59.868	52.632	1.132	TGACACACGAATACACTTTGCC	60.207	45.455	2.207	120	3.339	AAC	11
138909	TTGACGAGGTAGGTGTGGTG	60.080	55	0.080	AGGATTGTGAATGTGACAGCG	59.674	47.619	1.326	126	1.407	ATC	8
139006	TCACCCTGTATACTGTGGCAC	60.215	52.381	1.215	ACTCCCAACACCACTACTCC	59.422	55	0.578	134	1.793	C	12
139082	CCCGTTCTTTGTACTCTTCCC	59.059	52.381	1.941	ATCCATGGTCGAATTTGCCG	59.726	50	0.274	121	2.215	C	11
139147	GGTGTTTGCCGTGTGAGAC	60.085	57.895	1.085	CACTAACACCTCTCCCACCG	60.507	60	0.507	107	1.593	C	18
139711	AAGGCCAATACCCGTTGTTG	59.506	50	0.494	ACACAGTTGATCACAGCAGC	59.515	50	0.485	120	0.979	ACT	10
139791	ACGTAATGATGTTTGCCTCAAG	58.069	40.909	3.931	TGCGTGGAATTTCTTGACTAGC	60.013	45.455	2.013	125	5.944	AACT	6
139908	AGCTGCTAATAATGCCAGAACC	59.550	45.455	2.450	TGTTGAGACATTGTGCACAGAG	59.883	45.455	2.117	134	4.567	ACAG	8
139933	GTCGTTCCCAACTCTGTGTG	59.522	55	0.478	TGTGGTGCGGGCAAATAGG	61.433	57.895	2.433	128	2.911	AC	20
139952	TGAGATTTCAACCAGCGCG	59.572	52.632	1.428	CTTGACGTAGCAGTGACGAC	59.398	55	0.602	103	2.030	AC	11
140037	ACGTCCGCAACAATGAGAAC	59.873	50	0.127	ATCGGTGGGTTGTTATCGGG	60.583	55	0.583	102	0.710	C	17
140089	TTGAACCGAAACCTGGTTGC	60.010	50	0.010	GGTAGAACAGGGAAGGACTACG	60.337	54.545	2.337	129	2.347	AAACG	8
140174	ACCTCTGATTCCGTAAGCCTC	60.009	52.381	1.009	ACGGGCGAAATAATGGATCC	58.863	50	1.137	119	2.146	AAATT	6
140405	CGTCCCATTGTTGAGGCTTC	59.941	55	0.059	TGTTGTGTAGGTAGCGGCC	60.457	57.895	1.457	122	1.516	AC	13
140532	TGCGCTGCTTACGTCAATAC	59.737	50	0.263	GCACCCAAGTATACACGCTG	59.733	55	0.267	124	0.530	A	10
140587	TGTGGGAAGTCAGACTCACG	60.081	55	0.081	CCTAGCGAGCGGTATCATTG	59.035	55	0.965	143	1.046	ACTG	9
140618	TCCAATTCATCGTTAGACACCC	58.896	45.455	3.104	CTGAGTGTGATCGCGAAGTC	59.464	55	0.536	105	3.640	A	11
140821	GTACCCACGGAAATCACAAAC	58.198	47.619	2.802	CCTTCATGGGCCCTTCTCC	60.539	63.158	1.539	144	4.341	C	13
140874	GTCCGTCCGTCCTTCCAC	60.474	66.667	2.474	TGTGTAGGGCCTGTACGTATG	60.01	52.381	1.010	129	3.484	ACGG	7
140874	CGTCCTTCCACCCACCTAC	60.158	63.158	1.158	TGTGTAGGGCCTGTACGTATG	60.01	52.381	1.010	122	2.167	ACGG	7
140911	GACTTTGTGGTGACGACAGG	59.522	55	0.478	CGGCCTGACATACTGTATCAAC	59.628	50	2.372	115	2.850	C	16
140922	TTATCGTAGCCCACTCAGCC	60.008	55	0.008	GCCTGTAATGGGACTGCTTTAC	60.077	50	2.077	139	2.085	A	10
141011	TACTGGCCTGCAGAAAGAAC	58.572	50	1.428	TCCGAACAATTGCAGTCTCG	59.312	50	0.688	107	2.116	C	10
141168	AGGACAGTGCCAGGAATAGC	60.224	55	0.224	GGGAGTATGTTGCCTTCACC	59.005	55	0.995	127	1.219	C	11
141210	GAGGGCTCTGGAGATGGAG	59.321	63.158	1.679	AGCCCTCTTTACGTAACTCTCC	60.01	50	2.010	115	3.689	C	11
141267	TGAACTCACATCTGTCGGGC	60.791	55	0.791	GCAACACATCTTCGGGCAC	60.523	57.895	1.523	128	2.314	ACC	10
141690	TGACAAAGTGGCACTGGGAC	61.228	55	1.228	TGTCCTTCTGTTACGCGTAG	58.115	50	1.885	131	3.113	A	10
141897	GGAGCACAGGAGATCGGATG	60.719	60	0.719	TGTTTGTGCGTTTGTTCCCG	60.919	50	0.919	128	1.638	C	17
142163	CCCACTGCTGCTGTTAGTAC	59.020	55	0.980	GCCAAGTTGTCACGTCACC	60.085	57.895	1.085	138	2.065	A	12
142291	GTCGTCCTCTTTGTGCGTG	59.870	57.895	1.130	GTGCGACACTGTATACCCTAG	58.396	52.381	2.604	142	3.734	AAT	10
142441	GACTGGCTGTTACGTCTGAC	59.037	55	0.963	TCTCCGTAAAGTACAGGCCG	59.939	55	0.061	104	1.024	ACTG	7
142453	GCAGGAGGTGGGTGTTGG	61.036	66.667	3.036	TCAGCCCACCACAAACCG	60.954	61.111	2.954	128	5.990	C	13
142543	AGGTGTCACGTTTGTTAGCTC	59.270	47.619	1.730	GACTTAATCTTTCCGGCCGC	60.083	55	0.083	134	1.813	C	10
142564	GCTTTATTAAACAGGGAGCGTG	58.732	45.455	3.268	ACAGTCAAGGGAAATACGAAGG	58.827	45.455	3.173	137	6.441	A	10
142648	GTCAGTAAGCCTTGTACGCG	59.739	55	0.261	CAGTACGTCACAGGCAGAAC	59.317	55	0.683	125	0.944	ACAG	12
142713	ATTCCGTCTGACACACCCTC	60.152	55	0.152	AATTTCGTGTTTGGGAATCAGG	58.243	40.909	3.757	106	3.909	ACG	13
142715	ATCGTCCCATCTCTGCCAAG	60.296	55	0.296	GCGGCATGTGAAGTCCTTG	60.231	57.895	1.231	103	1.527	A	12
143059	AAGCAGTTTGATAAGGTTTGGC	58.505	40.909	3.495	TCCCAACATGCCCTACTCAC	60.151	55	0.151	117	3.646	A	10
143177	TTACAGTACCCTCGCCATCC	59.646	55	0.354	CTTCTGGATTTGCACTCCCG	59.658	55	0.342	111	0.696	AC	23
143369	TGGGCTCAGACTGCAGTTTG	61.296	55	1.296	CGTTTAGCCACACACCTGC	60.158	57.895	1.158	121	2.454	ACTC	10
143384	TATGATGGGAGGGTGTGGAC	59.269	55	0.731	AGGCAAGTCAAGAAATCCGC	59.583	50	0.417	109	1.148	A	10
143429	GCGTTCCGTTTGTCTTGATG	58.776	50	1.224	GGGAATTTCTTGACGAGCTGAG	60.078	50	2.078	106	3.302	AACT	6
143461	GCTGAGAAACTGTTAGCTTCCC	60.013	50	2.013	TGCCGCTCAGCTACGTTG	61.162	61.111	3.162	128	5.175	ACTG	16
143512	CTCCATGCAGTGAAGGAGTG	59.015	55	0.985	ACCTGCCTGTATTCTGAGTCG	60.283	52.381	1.283	100	2.268	C	10
143808	ATCAAGAGTGTCGGTTTGCG	59.592	50	0.408	CCCACATTGCGACACTTCC	59.863	57.895	1.137	106	1.545	C	15
143986	GGTTTCTGGGTTCGCACTG	59.790	57.895	1.210	AGTCGGCGAGCAGATAGATC	59.869	55	0.131	117	1.341	C	14
144030	TCGTCCGACCGTTGATTCG	60.883	57.895	1.883	TGCGCCTAATACTTCACAGC	59.093	50	0.907	130	2.789	ATC	16
144112	GGCCCGGTAGAGTCTGTTG	60.530	63.158	1.530	TCCGAAGTTAAGAAAGGGCG	58.66	50	1.340	100	2.870	C	12
144355	GCTAATGTTCCCTCAGCCAG	59.081	55	0.919	CTCAGGACAGGGACAGGTAG	59.284	60	0.716	102	1.635	A	10
144582	GGTATGTGTGAGTGTTGCCAAG	60.529	50	2.529	CTTTGAGCTGGTTACTGTCGG	59.678	52.381	1.322	100	3.851	C	10
144643	GGCGGTCCGTAATAAAGGTAG	59.001	52.381	1.999	CACCTACCCGTCCTACACC	59.556	63.158	1.444	118	3.442	C	10
144643	TAGTCTCTCGCACTACACCC	59.007	55	0.993	CACCTACCCGTCCTACACC	59.556	63.158	1.444	100	2.436	C	10
144660	AAGTCTGTAAACCATCCGCC	58.646	50	1.354	CAATGAGCTTGGAAGATGTGC	58.6	47.619	2.400	134	3.754	AT	10
144866	GGAAGGGCTACAAAGGATTTCC	59.746	50	2.254	TCGCTCACCATATAAAGCCC	58.213	50	1.787	105	4.041	A	11
144909	GCCTTCATAGTGTGCACAGG	59.658	55	0.342	AAAGGGCAGAGAGGAAGGG	59.383	57.895	1.617	126	1.960	AC	13
144999	CTGAGGGCGTTGGAGAAATG	59.658	55	0.342	GCATACGGAACTCTGCTCAG	59.173	55	0.827	129	1.169	AAGG	17
145040	ATTCTGTTCGGCTAGTCGGG	60.294	55	0.294	TTTGTTGTGGGCATAATTTCCC	58.49	40.909	3.510	109	3.804	C	12
145137	GTGACGGAGCAAACACCTTC	60.153	55	0.153	CAGACGTACTCCACCCACC	60.158	63.158	1.158	123	1.310	C	10
145465	TCAGCATCACACTACTGCAAAC	59.948	45.455	2.052	TGGCAATGTTAATCCAGGCAG	59.664	47.619	1.336	106	3.387	A	10
145743	ACGCCACGGACTCTTATTCG	60.921	55	0.921	TCTATCCCAAAGCTCGACCC	59.645	55	0.355	116	1.277	C	10
145780	GTTGTCACCACTGCGCATC	60.521	57.895	1.521	GCCTGCCGCTTTATCTTGG	60.01	57.895	1.010	123	2.531	C	20
145867	GGCTAGAAACACACGCTCAG	59.665	55	0.335	GTGCAAGGTATGAGTGAGGC	59.374	55	0.626	120	0.961	AAC	13
146039	ACCTCAAACCACCTTTATGCAG	59.614	45.455	2.386	GGTTGCAGTGAAGGTACGAG	59.311	55	0.689	114	3.075	AC	23
146041	TGTCCTATATATGCACGTACGC	58.662	45.455	3.338	GCGTCTTGGCTTCTTAATGAC	58.348	47.619	2.652	105	5.990	AACT	11
146104	ACCAACGTCTTTCCTTGCG	59.421	52.632	1.579	ATCGAACAGGAACCCTCTGC	60.51	55	0.510	120	2.090	ATC	9
146392	GCCGAAACATGATGGAATAGC	58.470	47.619	2.530	AGATGTATGAACCACTGCTTCC	58.89	45.455	3.110	148	5.640	A	12
146409	TACTGAATAGGCTGCATCGC	58.593	50	1.407	GGCCCTGCAACAAAGAGTC	59.786	57.895	1.214	121	2.622	C	10
146493	AGACATGTGCACCTTTGACAG	59.534	47.619	1.466	CTGCTACATGTTTCGGCCTG	60.012	55	0.012	112	1.479	ATC	8
146571	CAGTCGGTAGCACTCCTCTG	60.293	60	0.293	GTGGCATGCATCTTTGGCTC	60.926	55	0.926	123	1.219	AC	19
146583	AATGGTCATTTGGGCGGC	59.451	55.556	2.549	GGTGGACTGAGTGACTTAACC	58.715	52.381	2.285	112	4.834	C	17
146746	TATCATCTGTCTGCAAGGCG	58.519	50	1.481	CCGGGAGTCCAACCAAATTTC	60.215	52.381	1.215	107	2.696	C	11
147060	ATTCAGGGTCCCAGTGTAGC	59.859	55	0.141	ATGCGCGTTGTATACTGACG	59.532	50	0.468	114	0.608	A	11
147307	TTTCAGCCGCGTACAGTC	58.471	55.556	3.529	TTACTCCGGCATTGTATGGG	58.129	50	1.871	141	5.400	C	17
147428	GCAGCCTGATTATCAAGTCGC	60.480	52.381	1.480	TTGTAGTTGCTGTTACGCCC	59.232	50	0.768	116	2.248	C	13
147570	CTAGGCCGTCTCACTGTTG	58.312	57.895	2.688	TGTGTTGTGTAGGTAGCGGC	61.071	55	1.071	120	3.759	AC	8
147798	TGCAGTACAGAAATCACAGGTG	59.359	45.455	2.641	GCAGCTGAAATTTAGACGCG	58.92	50	1.080	110	3.720	A	12
147811	ACTTTCGTACTCACATACTGCC	58.910	45.455	3.090	CAATACCTATCCTACCCACACC	58.152	50	3.848	128	6.938	C	17
147886	TCGTTGTCTTCATCACAAGGG	58.990	47.619	2.010	AAGAAGATGGAGTGCAGTGG	58.274	50	1.726	124	3.736	A	10
147995	CTGGGAGGCCAACAATGATC	59.362	55	0.638	TCGGTGTATCGCCTGTGTAC	60.293	55	0.293	134	0.931	ACC	14
148045	GGGTTGGGTTTGGTTAGGATAG	59.146	50	2.854	CCAACACAACCCAAACTAACC	58.309	47.619	2.691	127	5.545	AACCT	6
148078	TTTGAGGGTGAGCGGGAC	60.005	61.111	2.005	CACAACAAGCTACGTCGTCC	59.946	55	0.054	109	2.058	C	17
148142	TCTGCCCGCACTGATACAC	60.530	57.895	1.530	CCTTGTGGCGACTCGTTAGG	61.479	60	1.479	100	3.009	AC	12
148171	AGTGTACAAGGAGCAGGGAC	59.789	55	0.211	CCTTCATCATAGGGCTGCAC	59.152	55	0.848	134	1.059	A	10
148670	CAAATATGTAGGGAGGCGCC	59.227	55	0.773	CCCTTCCTGCTGAGATTCAAG	59.12	52.381	1.880	109	2.653	A	11
148822	TTGCGACACACAGATCCATG	59.305	50	0.695	CCTTCTCGCACCATAACTCC	58.806	55	1.194	118	1.889	AC	8
148894	CCGTTCTGCATTTGTTGGTG	58.967	50	1.033	CCGCTTCTCTTGACTTTCTGC	60.281	52.381	1.281	141	2.314	A	10
148977	GACCACCTGAAGAACTATTGGC	59.751	50	2.249	ACGTACCTACCCACCCAC	58.639	61.111	3.361	108	5.610	AACT	9
149014	CCCACGGTTCCTTTGGTTTG	60.365	55	0.365	GCTTTACGTCGTCAGCTCC	59.363	57.895	1.637	100	2.002	C	12
149446	CACAGGTTGGTAATTCGGCC	59.940	55	0.060	TTTCTGTGGTCTCGGGCC	60.005	61.111	2.005	119	2.065	C	10
149468	TTTGCCACGATGCTGATGAG	59.658	50	0.342	TCGTTTCACAACTTTCACACCC	60.336	45.455	2.336	100	2.678	A	10
149607	TCAGCTTCTCAAGGACTCCG	59.866	55	0.134	CGTCTGTGTCTGTCCGTCC	60.814	63.158	1.814	131	1.948	AACT	19
149996	TGATCACAGTCGTCACCTCC	59.866	55	0.134	AGTTCTGTCCGTCTGTAACAAC	59.041	45.455	2.959	120	3.092	AAC	22
150619	CGCAATAAGGCAAGCTGAAATG	59.888	45.455	2.112	TTCTCCCTTAGCCTGGTAGC	59.275	55	0.725	124	2.837	C	14
151252	AGTGCAAGTCTTATTCCCAGTG	59.089	45.455	2.911	ACACTTGGGAATGCAAAGGG	59.426	50	0.574	101	3.486	A	13
151282	GTGCGCATCGGTAAATTGTC	58.915	50	1.085	CCCTTCCCGCCTGTTTGTAG	61.435	60	1.435	102	2.519	AC	19
151311	CATTCACAAGAGCACGGAAC	58.132	50	1.868	GACTTAATCTTTCCGGCCGC	60.083	55	0.083	122	1.951	AAT	11
151492	GGAGCCTCGTACTGAATGTG	58.815	55	1.185	GGCGGTGAAGTGATGTCTAG	58.815	55	1.185	128	2.370	C	14
152093	TGCAGGGAATTTCTTGACTAGC	59.420	45.455	2.580	GTGTTTGCGTCTTTCAGTGC	59.259	50	0.741	137	3.321	AACT	12
152353	CTTGGTCAACGTTAGCCTGC	60.222	55	0.222	CACCCACTCATCCGTCAGTC	60.859	60	0.859	126	1.081	AATC	7
152752	CACGTAGGTAGAAGAGTGAAGG	58.395	50	3.605	ACTACGACTAACTGCGGCTG	60.573	55	0.573	123	4.178	AAAGT	6
152814	CGTGAACTCTCTGCGACCC	61.177	63.158	2.177	GGCGTGAATACCCTGCATAAAG	60.464	50	2.464	133	4.642	AAT	8
152932	GAAGTAGTGGGAGGTCGGTG	60.223	60	0.223	CGCACTACTTGACACAACACTG	60.775	50	2.775	103	2.998	C	13
153089	TGTGACACAGCATAAAGTTTGC	58.788	40.909	3.212	CGGCCTTCACCTGCATAAG	59.343	57.895	1.657	134	4.868	AC	19
153153	CAGTTAAGGCCCGGACACC	61.129	63.158	2.129	CGTGTGCAGTCTGAAAGAAAG	58.491	47.619	2.509	112	4.638	ACC	9
153396	TTTGCTACTTCTGCCACCG	58.817	52.632	2.183	GTGCACGGAGAAGTAACAGC	59.944	55	0.056	119	2.238	ATC	10
153397	TGGTTTCTACTTGCTGACGTG	59.270	47.619	1.730	GCAACAACAGAAATAAGCTCCC	58.915	45.455	3.085	108	4.815	C	12
153457	TTTGTACACAGTTCCACCGC	59.446	50	0.554	GTCGGATGAATTGGACTGGC	59.729	55	0.271	134	0.826	A	10
153487	TACATGTTCCGTGACTCCGG	60.223	55	0.223	CTTCAGCCGAAATCAGCCAC	60.292	55	0.292	130	0.515	A	11
153565	AAATTCCACTCTGTCCTTCCC	58.332	47.619	2.668	GCTCGTTCAAGACCGATACAG	59.551	52.381	1.449	135	4.117	AC	15
153618	TCATGGAACGTTGAGCTTTGG	59.876	47.619	1.124	GAGAATGCTCGGTTGTACGG	59.457	55	0.543	113	1.667	A	10
153771	GGCTGATGGTGGCTGTTATG	59.725	55	0.275	CTGGCTGAGAGACTGTTAGC	58.454	55	1.546	138	1.821	AACT	6
153780	CACCGATGCTCCATTGCTTG	60.642	55	0.642	TTTGTGTGTGGTGAAGGGC	59.254	52.632	1.746	139	2.388	A	11
153843	TCTCTTAAACACCTGTCCCAC	58.002	47.619	2.998	CCCTAAACTCAGCGCTCC	58.213	61.111	3.787	124	6.785	C	23
154446	GGGTTGTGAGTATGATGTGGC	59.739	52.381	1.261	CCGCACTAACCACAGCTATC	59.17	55	0.830	130	2.091	AC	34
154690	CTGTGTCGCTGGGTGAGG	60.786	66.667	2.786	ACCTAGTGCCCTCGTCTTAC	59.288	55	0.712	106	3.498	A	10
154697	AGCGTGAGAGGTGGAAGTG	60.083	57.895	1.083	AACGTGCTGGCCAAACTTTC	60.646	50	0.646	123	1.728	C	18
154711	ACTTGTCGTGCAGTGTTGG	59.346	52.632	1.654	CTGGCGGACAATAAATTAACCC	58.454	45.455	3.546	138	5.200	AC	8
154795	CCTTTGTGGCCCGTTCTAGG	61.435	60	1.435	TTGTGTTTAACGGCCCACTG	59.726	50	0.274	134	1.709	A	10
154872	ATCCGAAACGCCTGACAAAC	59.871	50	0.129	CCACCATGTTTCACCACCC	59.404	57.895	1.596	142	1.725	C	22
154896	CGTTGGAATGCAAGCGGG	60.547	61.111	2.547	CCCTAACACCACCCGTCAG	60.457	63.158	1.457	130	4.004	C	10
154995	AGCTGACCTGCCAAATGTATG	59.391	47.619	1.609	CCACCAAACAACGCAAATGTC	59.882	47.619	1.118	142	2.727	A	17
155064	GCAGTCTTGGTCTTCTGTCTG	59.338	52.381	1.662	GGCGGAGGAGGATATGAATG	58.361	55	1.639	105	3.301	AAC	9
155085	GGAAATCCGTGCGTTGGG	59.856	61.111	2.144	TCTCGTCATGTGTGTCCGTC	60.503	55	0.503	116	2.647	ACGG	8
155174	TGTGCCAGACTGTGTTGTTG	59.656	50	0.344	GTCGTACCGGTCTGTTACTTC	58.883	52.381	2.117	103	2.461	AAT	19
155218	TGTGCCAGACTGTGTTGTTG	59.656	50	0.344	GGTCGTTCCGGTATGTTACTTC	59.566	50	2.434	104	2.778	AAT	19
155371	ACACGAGATTTCAAGCCTGTG	59.606	47.619	1.394	GTTGGTCGTCTGCTATCCAC	59.1	55	0.900	119	2.294	ACC	8
155682	GTCCCGGCACTGCAAATAC	59.937	57.895	1.063	CAAACCCGGGCTCTCTACC	60.533	63.158	1.533	102	2.595	C	11
155735	TTTGCTGCACCTGATCACAC	59.797	50	0.203	AGACACCTCTGCGACTGG	59.375	61.111	2.625	128	2.828	AC	27
155769	CTGCTCGCGACACATAATTTG	59.032	47.619	1.968	AAACACGTAGCTCCGACATG	59.03	50	0.970	118	2.938	C	13
155855	TCCGGCCATAATGATGTTACG	58.993	47.619	2.007	TGCAATTATTCAAACGCGCC	59.11	45	0.890	137	2.897	ACAT	10
155931	TGTGACACCTGATACACTGTG	58.372	47.619	2.628	CGTCATTAAGCGCGATAATAGC	58.829	45.455	3.171	108	5.799	A	10
155994	CCTCCATAAACAGCGCAGTG	60.012	55	0.012	GGCTGCTGGAGACTCGAG	60.242	66.667	2.242	108	2.254	A	12
156188	CACGGTAGCGAGGGTTCTG	60.891	63.158	1.891	TTACTCTCCCGCAGCGTTTC	61.136	55	1.136	104	3.027	C	13
156295	GCGTAGTATCGGCCATGTC	58.919	57.895	2.081	GCGCATGTGAGAGATGTTGG	60.361	55	0.361	120	2.443	A	11
156335	CCCTGCTGCATTATCTCTGTTG	60.142	50	2.142	GACCTTTAAATGCCTGAGTTGG	58.318	45.455	3.682	133	5.824	A	10
156432	CACGGTAGCGACGCATCTAG	61.386	60	1.386	ATTTATCTCACTGTTCCGCCG	59.201	47.619	1.799	100	3.185	C	21
156822	GGGAACAGCTGACATCTACC	58.436	55	1.564	AGAGAACGCAGCCCAGTAAC	60.792	55	0.792	125	2.356	ACTC	11
156854	ACCATTAACCATCTAGTCGTGG	58.364	45.455	3.636	AGGTGCGAATGAAGCCAAAG	59.868	50	0.132	131	3.768	AAT	12
156873	ATGCTGTGTTTAGGCCGATG	59.369	50	0.631	AATGCAACAGTCACGGAAGC	60.152	50	0.152	127	0.783	C	11
156918	TGCATGGACCGTAGATCCG	60.009	57.895	1.009	TTGGCAAACTGTTATTCGCTC	58.194	42.857	2.806	103	3.815	A	12
157074	TATCCAGCCTGACTCTGTGG	59.279	55	0.721	GTGGTCAACTTCATGCCCTG	59.868	55	0.132	101	0.853	C	15
157154	ACGATGGGCTGTGACTGTG	60.754	57.895	1.754	TCCTCATTACATGTTGGGATCG	58.695	45.455	3.305	100	5.059	C	11
157578	TTAGACTCCCATGCCGACAC	60.223	55	0.223	TCACGTTCCATTTGACACCC	59.153	50	0.847	110	1.070	C	12
157655	TTAGACTCCCATGCCGACAC	60.223	55	0.223	CCTGCCGTGCCCATATCAC	61.642	63.158	2.642	125	2.865	C	12
158007	AAACAACCTCGACACCTACTG	58.648	47.619	2.352	GAACATAGACTGAAGGAGCGAC	59.309	50	2.691	142	5.043	AAACG	9
158088	GCCACATGACTAGTTCCGAC	59.100	55	0.900	GGCAGCCCGTATGAGATTGG	61.641	60	1.641	108	2.541	C	15
158172	GAACCCACAATCCCAGCAAG	59.866	55	0.134	ACCGCCTTCAGTTAGTACAGG	60.215	52.381	1.215	130	1.349	AAT	9
158536	TGCCGGTGTCTCCTTCTAG	59.176	57.895	1.824	AGGATGACACTACCGACACG	59.94	55	0.060	135	1.885	C	12
158591	AAGCTGTCCAGGAGTCTAGC	59.573	55	0.427	ATCCTGGACAGCTTGACGAC	60.508	55	0.508	129	0.935	ATC	10
158697	TGGCTTAGGACAGGGACAAG	59.787	55	0.213	CAGAAGCTAACAGTTCCTCAGC	59.755	50	2.245	116	2.458	A	14
158726	AGCTGAGAAGTGAGAAATTCGG	59.166	45.455	2.834	ACCTACTTCCCTGCTGCATAG	60.007	52.381	1.007	106	3.842	ACT	9
159130	CTCAGCTTTGGACGGTTAGTG	59.678	52.381	1.322	AGTGTTTCCAGCCTCATCTG	58.274	50	1.726	115	3.048	A	13
159459	CTTATGGACGAGCAGCCC	58.290	61.111	3.710	ACCGTCTGTTCAGGCTCTG	60.083	57.895	1.083	110	4.792	AC	9
159485	TGTACCGCATATCAGGTCGG	60.081	55	0.081	TGAGATTCCTTGGTGTACACG	58.443	47.619	2.557	127	2.638	C	14
159553	AACTTACCATTCGACGCGTC	59.390	50	0.610	TCCCGTAGCTATGACATCGG	59.51	55	0.490	108	1.101	AC	27
159849	CCTAGGGCTGCGAGACAAAG	61.212	60	1.212	CCACGTGTGAGTTAGTTCATGC	60.588	50	2.588	147	3.800	AT	12
159878	ATCTTTAGCCAAACAATCGCG	58.338	42.857	2.662	ATGAAACTCTGTCGGGTGGG	60.44	55	0.440	129	3.102	AG	8
160466	CAACAGCCTGGAACCATCAG	59.582	55	0.418	GGGACCAATATTAGGCAGTGG	58.903	52.381	2.097	126	2.515	C	15
160864	GTCATCGCGTTTGTACCTGC	60.633	55	0.633	AGCCAGGCTCGTCATATATGG	60.215	52.381	1.215	122	1.849	AC	10
160889	ACCTGCTTCCTTGAAATGTGC	60.146	47.619	1.146	AACTTCCTTCTCTCTGCGTC	58.015	50	1.985	111	3.131	C	10
161004	TCCAGAGGAGTCGTACCG	58.112	61.111	3.888	TCCTTCCCTCTTCTTCCTACGG	61.406	54.545	3.406	100	7.294	A	15
161338	TTGTGGTTACTCGGGCGG	60.399	61.111	2.399	CTCTTCTTCTCCCACACACC	58.29	55	1.710	132	4.109	C	12
161357	TCTTAGGTCTGTTCGCTGGC	60.507	55	0.507	TTTCTCTTTATCCTGGTGCCC	58.406	47.619	2.594	119	3.102	C	15
161424	TGTCTTTGCCATGAAATTCTGG	58.239	40.909	3.761	GTGCTTGGGATCTTGTAGCC	59.369	55	0.631	122	4.392	C	11
161517	CTGCGTTGCTTATGGAGGTG	60.012	55	0.012	TGGTTGAGCTGTTGACTGTG	59.084	50	0.916	119	0.928	ACTGC	6
161567	AGATGGCACGGTACTACTGAC	60.010	52.381	1.010	GCATCCAGGTTTGCAGTGAC	60.504	55	0.504	135	1.514	C	22
161638	ACCCTGTAGTCTCCAACAGC	59.789	55	0.211	TACACCTCGCCCTAACTGTG	59.865	55	0.135	131	0.346	C	13
161946	AGACTGAGCTATCTGGAGTGC	59.734	52.381	1.266	TAATGTCAGAAGTCGCTCCG	58.18	50	1.820	111	3.086	AC	11
162058	AGTAACCGCTGTGCCTTAAAG	59.332	47.619	1.668	GTTACCGTTTGCATGAGTGAC	58.554	47.619	2.446	120	4.114	ACT	8
162202	ACTAGTTTCAGTCGCTTTGGG	58.989	47.619	2.011	AGCCACATTATAACAAACCTGC	58.044	40.909	3.956	113	5.967	A	15
162208	TGGCTGTCTTTGTATGCTGC	59.584	50	0.416	TTTGACTGCCTCCACCCAC	60.613	57.895	1.613	135	2.030	A	11
162271	CAGGCCTGTAATGGGATTGC	59.722	55	0.278	ACCAGTGACAGGCTCGTATG	60.223	55	0.223	105	0.501	A	10
162789	ACTCTTTGTGCATTTGTTGGTG	58.973	40.909	3.027	ATGGAGCCACTTAGTCAGGC	60.224	55	0.224	138	3.251	A	10
162792	TTTGGCCCGAGTCTTGCAG	61.353	57.895	2.353	TTAACAATTTGCAGACTCGCC	58.194	42.857	2.806	101	5.159	C	21
162825	AACATAATGCCGCCTCAACG	60.012	50	0.012	AAATCTGGGAGCCTCAACCC	60.444	55	0.444	112	0.456	A	12
162895	CGGCTATGGTACCCGATGTG	61.067	60	1.067	TCAGGGTTGCACAATAATCCTC	59.15	45.455	2.850	100	3.917	A	12
162949	AGACATTACGTGACCTTCCG	58.097	50	1.903	CCTTAATGGCATGGACAGGG	59.067	55	0.933	103	2.836	A	10
163046	GGATTACTGAGGGAGCACTG	58.144	55	1.856	ATGCGTTCACAGATACAGGC	59.091	50	0.909	145	2.766	ACGC	7
163056	GTTGGAGACCTGGGCTTGG	61.064	63.158	2.064	ATAGTGCCGCCCAACCAAAG	61.728	55	1.728	100	3.792	C	17
163137	CGGGCGGATTTACATTGTCC	60.082	55	0.082	TTATCCCAGCAGCCTACCAC	59.933	55	0.067	119	0.149	C	13
163165	TTCCTCCGAAACGCAGGTAC	60.789	55	0.789	CACCAACAAATGCACAAAGGG	59.539	47.619	1.461	113	2.249	A	10
163284	GCTGTCAGTTTCTCAGGGAC	58.946	55	1.054	CGTTGAGAACTGACCTATGGC	59.476	52.381	1.524	139	2.578	ATC	10
163591	GGAGGAGTGTTGTGCAGAAC	59.516	55	0.484	AGTGCGCCGTGAAACAATC	60.158	52.632	1.158	110	1.642	A	18
163741	TCGGAATCTGGGTTCGATTTC	58.854	47.619	2.146	ATCGAGTAGGAGGCTGGGTG	61.528	60	1.528	108	3.673	C	10
163921	TTTCGCGTGGGATGATGGC	61.858	57.895	2.858	TACAAATTCTGCGCGCATCTC	60.413	47.619	1.413	100	4.271	A	10
164694	ACACATGCTTACCTCCCTACC	59.937	52.381	1.063	GGTAGGTTGTTAGGTATGTGCG	59.562	50	2.438	101	3.501	AC	13
164736	TCCTTCTCACTGCGGGAATC	60.223	55	0.223	TGATGTTAGCGAAATCAAGCCC	60.077	45.455	2.077	125	2.300	AC	18
164963	GTGCTGCGCTGTACTGTAC	59.653	57.895	1.347	TTTCCCTACACGACGCTCTC	60.223	55	0.223	114	1.570	ACAGC	7
165505	GGGCATTTGTCTCGATCAGC	60.082	55	0.082	ACAGGCCTTAACTACACCCG	60.152	55	0.152	120	0.234	C	13
165546	CCGGGCCAAGGAATCATTATAG	59.420	50	2.580	TCTGGTTGAGTTCTATGCGTC	58.52	47.619	2.480	111	5.061	A	10
165575	TGGCAAACAAATTCCATGGATG	58.826	40.909	3.174	ACTCTCCCACGACACTTGC	60.382	57.895	1.382	129	4.555	AC	17
165636	ACGCGGACCCATATAGAACC	60.080	55	0.080	TCTCTCCTACCCGCCCTG	60.486	66.667	2.486	135	2.566	C	13
165742	TAGCGCGTCTGTATACCGAC	60.153	55	0.153	TATCACCATCCACTCGGCTC	59.72	55	0.280	123	0.433	A	10
165826	CCTGTAAACCTTCGGAGCTTC	59.404	52.381	1.596	ACATGTAACTCCTTGAAGCCTC	58.824	45.455	3.176	106	4.772	AAT	9
166146	TGGCCACAACTCAAGAATGC	59.795	50	0.205	TTTGGATGTGGGTTTGCTCG	59.796	50	0.204	104	0.410	AG	14
166275	GTAAGTAACGCGTGGCCAC	59.942	57.895	1.058	ACAGAAGTTGCAGTGCTCAG	59.159	50	0.841	114	1.900	AC	33
166355	GTGGTCGATTGTGCTGCG	60.240	61.111	2.240	CCACCCACCCAATAACATCC	58.99	55	1.010	110	3.250	C	15
166470	ACTTCCAACAACAACCGTCAC	60.012	47.619	1.012	TCCGAGGAAGGTAAAGGCTAC	59.663	52.381	1.337	122	2.349	A	10
166562	ATTTACTGTGCACTGCCCG	59.190	52.632	1.810	TGTTAAGCGTGCACAGTGAC	59.804	50	0.196	115	2.006	AC	8
166604	TGTACTTGTTTGCTGCCACG	60.082	50	0.082	TGTCCTGACGAGCCTAGTTG	59.866	55	0.134	133	0.216	A	10
166638	GTACTTGTCCTTTGTTGCTCTC	58.016	45.455	3.984	AACCTGATGACGCGCCATG	61.851	57.895	2.851	111	6.835	AAT	12
166639	AGCTCACAATAATGGAGTCCG	58.574	47.619	2.426	AAGACTCTGCAGGGAAAGGG	60.078	55	0.078	117	2.504	A	12
166696	CACCACCTAAAGACAAGAAGCC	59.947	50	2.053	TTTGTCACAAGCATCCAATCCC	60.207	45.455	2.207	100	4.260	A	10
166759	CTGGAGCTCACTGAATCGTG	59.102	55	0.898	ACAGTCTGTAGCTTAGTCACGG	60.272	50	2.272	113	3.170	A	10
166820	TCCCGATGGTGTCACTGAAG	60.152	55	0.152	AGGTGGTAAGGTTGTCAGCC	60.369	55	0.369	112	0.521	C	11
166875	CACGTCAGTCATTCTCGCTC	59.464	55	0.536	TTACCGCTGCGTCTTAATTTG	58.008	42.857	2.992	120	3.528	C	20
167327	GAATTGTTCTTCGTGGCGGG	60.570	55	0.570	GACATCCCTCAGTGGTCAAAG	59.054	52.381	1.946	111	2.516	C	10
167356	GCCATGCATGCCAACAGG	60.554	61.111	2.554	TCAACGCCTCACCATGCC	61.106	61.111	3.106	128	5.660	AGGC	6
167559	TCGTCCTTGTAGCTAAAGTGTG	58.846	45.455	3.154	TGTCCGCCATTCCTTTCCAC	61.37	55	1.370	116	4.524	C	14
167609	GGAAAGGGAAACTGCTGCTC	59.868	55	0.132	GCGCTAATCCCTTCAGATCC	58.946	55	1.054	145	1.186	AC	12
167735	CACCGAAGACCAACCAACC	59.416	57.895	1.584	GGTACGTTGGTTGGTCGGTC	61.689	60	1.689	139	3.273	AAAC	6
167735	GGTACGTTGGTTGGTCGGTC	61.689	60	1.689	AACGTACCGACCGACTGATC	60.292	55	0.292	119	1.981	AACC	9
167791	ATAGGAAGTTAGCACGCGGG	60.649	55	0.649	GCAGCGTACAAGAAATGGAGAC	60.652	50	2.652	104	3.301	C	14
168037	ATTGGCCAATATCGGTGTCC	58.780	50	1.220	GAGGCCCATGTGTACTTCAG	58.723	55	1.277	120	2.496	A	10
168197	AGTACCAGCATTCTCGTGTG	58.378	50	1.622	CTACATGCATTGGGAGAAACAC	58.393	45.455	3.607	111	5.229	CG	8
168289	GATACCTGGTTCAGCTCTTGG	58.848	52.381	2.152	GTGAAGCTGTTGATGAATGGTC	58.662	45.455	3.338	118	5.491	A	10
168522	TGCTCCATGGTGTCAGTCAG	60.439	55	0.439	ACTAACTAACCGACCGACCG	59.941	55	0.059	137	0.498	ACTG	11
168530	CACCTGCTCATCCCTCAATG	59.079	55	0.921	TGTGTTGTCAGGTAGAGGTCTC	59.878	50	2.122	103	3.043	AC	11
168643	TTCAACACATGCCTGATCGC	59.941	50	0.059	TTGTTGCCGGCTTGCTTAAC	60.715	50	0.715	110	0.774	C	23
168718	ACAGATGCTCCATTCTCAGAAC	58.894	45.455	3.106	GGTTATGAGCACCTCCCTCC	60.296	60	0.296	118	3.402	C	10
168727	TTGGTCGGTTGGGTGGTC	60.243	61.111	2.243	CAACTACACTCCCACCAAACC	59.532	52.381	1.468	130	3.711	AACC	7
168727	CGACCACCCAACCAACCG	61.713	66.667	3.713	GCTTGTTATCTGGCTGGCTG	60.011	55	0.011	104	3.724	AACC	6
168762	TGAATTCTCGCACATCCCAC	59.013	50	0.987	GAGTGTTTACAGCGCGGTAC	60.016	55	0.016	124	1.002	A	11
168871	AGTCCTCGAGAAGCTGACAG	59.581	55	0.419	AGAACCAGCTTCATCCCGAC	60.51	55	0.510	115	0.929	ATC	11
168876	CCAGCGACCTCATGTAACAAC	60.013	52.381	1.013	CTGATATGGCGGCAGAACTG	59.519	55	0.481	144	1.494	AC	17
168916	CAGAAGTTGAAATGTGGCGC	59.043	50	0.957	ATTGTCTTCGGCGCCTTGG	61.788	57.895	2.788	131	3.745	C	16
169033	AACTCCATGGTCTCTGTGGG	59.786	55	0.214	GCCTGTAATGGGACTGCTTTAC	60.077	50	2.077	136	2.291	A	11
169168	TAGCGCTGTTCTTTCAAGGG	58.942	50	1.058	ATGGCTGGCATGGTAACC	58.073	55.556	3.927	103	4.985	AC	8
169407	CCGGTGTACTGAAGACATGC	59.381	55	0.619	CCGAGGGTGAAGAGCATGTC	61.212	60	1.212	116	1.830	AC	12
169430	CCTGTCTTGCATGAATTCACAG	58.659	45.455	3.341	ATGACAAGAAACTGCCACGC	60.152	50	0.152	106	3.493	A	16
169470	ATGAAGTGGATTGCGCAAAC	58.390	45	1.610	CAACACCGGATTCCACACAG	59.871	55	0.129	130	1.739	C	15
169686	GACTCTACTGCCAGGAGAGG	59.361	60	0.639	TGGTCTTCTTCCCACTACCC	59.123	55	0.877	147	1.516	C	14
169724	AGGTAGGTGGGCAGGCAG	61.783	66.667	3.783	CCACCTCTCCATTCACCTACC	60.284	57.143	1.284	139	5.067	CCCG	6
169894	GACTCTACTGCCAGGAGAGG	59.361	60	0.639	AGATCTCGGCTTTCCTCTCC	59.356	55	0.644	120	1.284	C	16
169938	GACGTAAATCTGGGTCCAAGAG	59.234	50	2.766	ACTCACTGCCCTGATAACTTC	58.146	47.619	2.854	111	5.620	A	11
170264	CGAATGATGACGTGGTGTGG	60.014	55	0.014	CGATCTTGGGTTGTCACGTG	59.944	55	0.056	117	0.069	A	17
170416	GAGTGGCCGCAAACCTAC	59.157	61.111	2.843	GCCTTCGGTGTTCCAAACC	60.084	57.895	1.084	103	3.927	C	16
170493	TGTTTCAAGTCCGGCTGTTG	59.727	50	0.273	TACATACACACGTGCCCATG	58.732	50	1.268	109	1.541	AATG	7
170619	GTAGGTAGAAGAGGGACGGAC	59.463	57.143	1.537	CCTATGATGGGTCCTGGATTAC	58.214	50	3.786	100	5.323	ATC	15
170671	ATAGCGTGATGGGTCCTTCG	60.366	55	0.366	ACGGATGTGCAGTAAAGACG	59.03	50	0.970	105	1.335	A	10
170748	CCCTCTTCAAATCTTCAGCCG	59.741	52.381	1.259	AACACGTTCCGCAGTTCTG	59.426	52.632	1.574	119	2.833	A	10
170899	TACACCGAGGGCTGTAATGC	60.580	55	0.580	TGAGTTCGAATAGCACAGTCAC	59.176	45.455	2.824	103	3.404	AAG	16
170998	GCCGCATTGTCGAAGTTTCC	61.187	55	1.187	TGTTGTGTAGGTGGCGGTC	60.68	57.895	1.680	131	2.867	ACGC	6
171010	GACAGGAAGAGGGAGGTGAC	59.863	60	0.137	CGGGTGTGAGCTCTTTCCAC	61.7	60	1.700	119	1.836	C	11
171246	TTGCCAATTGATAGGCCCAC	59.282	50	0.718	AACAATTGCCACCATTATCGTG	58.648	40.909	3.352	131	4.070	A	14
171411	GAATAAGAAGCTGAGTGGCCC	59.465	52.381	1.535	TTAACAGACTACGGGTTGGAC	58.093	47.619	2.907	113	4.442	A	10
171434	CATGCGCTGTACTTCTGTTG	58.214	50	1.786	GCAAACTAATACCATCACCGGC	60.721	50	2.721	115	4.507	AAT	8
171803	TGCTGCAATGTGGTAACCTG	59.509	50	0.491	GCGGTTTGACAGTGTGTGG	60.377	57.895	1.377	104	1.868	AC	24
171883	ACGCTTCACTAACACACGTG	59.528	50	0.472	TGTTCCGATTATTCCTAGCCC	58.002	47.619	2.998	118	3.470	C	11
171904	GGAGGACACTTGGATTGCAC	59.583	55	0.417	GCAGTTAATCCCGCGTTCTC	60.083	55	0.083	120	0.500	A	11
171955	GGATAGGGCCTTGGTACCC	59.618	63.158	1.382	ACGGACTGCAGTTCTAACCC	60.438	55	0.438	118	1.820	C	14
172117	GGATGTTCAGCAATGGGACG	60.011	55	0.011	CACAATCGCTGGTCACTTCC	59.942	55	0.058	108	0.069	ACTG	6
172327	CTTCATCCCTTGCAGTGCTG	59.940	55	0.060	GGCAACATCCATCAAGCAGC	60.926	55	0.926	112	0.986	AC	8
172362	CACAGGTGGGCTGTATGAC	58.588	57.895	2.412	ACGAATCGCTTCATTACGCG	60.153	50	0.153	116	2.566	AG	12
172485	CGCAGCGTACAGATTTGACAG	60.672	52.381	1.672	TGTGTTGTTCATTCCGTGCG	60.431	50	0.431	138	2.103	A	10
172654	CAGCCCTGTCTGTGGAAATG	59.582	55	0.418	CCACCCACATCACATTTACCG	60.011	52.381	1.011	113	1.429	C	14
172698	CTGGTTATTCATACCTGCAAGC	58.196	45.455	3.804	CCCTCCTTCTTAAGCTAGTCAC	58.37	50	3.630	121	7.434	A	10
173048	TATGTCTACCGGAGTGCCAC	59.650	55	0.350	TCGAATCCTGACAGTCTGCG	60.574	55	0.574	120	0.924	A	11
173235	CCCAAATCAGGCCTAGACCG	60.939	60	0.939	TCACTTGTTCAGAGGAGGCC	60.079	55	0.079	108	1.018	AC	10
173380	GCGTGAACTTATCGAATGTGTG	59.074	45.455	2.926	TAGCTTCGCAACCAACCAAG	59.514	50	0.486	137	3.411	CG	10
173380	ATTGGGTGGCTGAGGATGTC	60.515	55	0.515	GGGAACGCTAATCAACTGACTG	60.078	50	2.078	110	2.594	C	15
173465	CGTTGGTAGGCAAAGCAGTC	60.222	55	0.222	TACGCGTACCACAACCTCAG	60.504	55	0.504	133	0.726	A	10
173862	CAATTTACTATAGCCCGGCCC	59.327	52.381	1.673	ATCCCAATCTTTACCCGCCC	60.589	55	0.589	120	2.263	C	12
173953	ACATTACGCGCCATCACG	59.326	55.556	2.674	CCCAGGCGCGGATATAGC	60.863	66.667	2.863	126	5.536	AAC	15
173968	ACAAACACACGCTCAGAATATG	58.081	40.909	3.919	CCAGAAAGCACAAGACAGGC	60.152	55	0.152	112	4.071	A	10
174256	TGGCACATGGATTTCTTCTCAC	59.683	45.455	2.317	GAGGTTCTCGCTTGCTTGTG	60.222	55	0.222	101	2.540	AC	8
174327	ACAGACACAGTAGAAAGGAGC	58.090	47.619	2.910	TGAAACCTGCAATTACGCCAG	60.214	47.619	1.214	108	4.124	A	25
174471	GCTTCCTTCGCCTTTACTGG	59.659	55	0.341	CGCATGTCAGCAGAACCAAC	60.846	55	0.846	144	1.187	A	12
174573	TGCACCTCAGAAAGTGTATAGG	58.296	45.455	3.704	TGCCAACAACTGTGAACAAAC	58.797	42.857	2.203	130	5.908	AC	8
174972	TTATGGGAAGGGCAGGTGTG	60.443	55	0.443	ACTTTACCTCACATGCGCTAG	58.859	47.619	2.141	141	2.584	AC	26
175100	GTGCCCACCTAGCCTTGTC	61.131	63.158	2.131	CTAGACGCCGGTGTTTGTTC	59.945	55	0.055	102	2.186	C	12
175334	CAACCTCAAAGCTCCCTCC	58.497	57.895	2.503	GGATTGACTGTGCCATTCGG	60.011	55	0.011	104	2.514	C	10
175396	TCCAAACGGAACTGAACCC	58.346	52.632	2.654	TTGCCGGACTTCACGAATAC	59.026	50	0.974	138	3.628	C	11
175433	GCGTATTGTGCAACCCTGTG	60.848	55	0.848	ACAGGGACATGTTCTCCACC	60.078	55	0.078	141	0.926	C	14
175440	CTTTGTTGCCTGCATTCACG	59.321	50	0.679	CAGGAGGTGAAATTGGATGGTG	60.01	50	2.010	107	2.689	A	12
175668	CAGTTATTTGCGTCACATTTGC	58.184	40.909	3.816	AGCAGCCTTCAGATCACTTG	58.645	50	1.355	135	5.170	A	11
175845	GTCAGCGGAAGAAGACGTAC	59.115	55	0.885	GGGCCTTGATTTCGTGTTTG	58.677	50	1.323	134	2.208	C	15
175942	ATCCACGCGTGACAGATAGG	60.364	55	0.364	TAGCAGCACCCAAACGTTTC	59.799	50	0.201	101	0.565	AC	12
176210	GTGTTGACGATACATCCCACG	59.815	52.381	1.185	AGGTTGCGCGTCTTGTTATG	59.943	50	0.057	136	1.242	AAT	11
176218	GGCAACAATCATACTGCAGC	58.540	50	1.460	CTCCAATGCCACAGAATGTTTC	58.913	45.455	3.087	124	4.547	A	12
176246	GGACTAAGGAGGAAAGAGAAGC	58.633	50	3.367	CTCCAGCTTCCATTCAGTGAC	59.401	52.381	1.599	115	4.967	A	13
176414	TTGCCCGACGAATGGTAAC	58.898	52.632	2.102	ACCCACTAACGGTCGATACG	60.011	55	0.011	140	2.114	C	10
176425	TCCACCATCAATTACACAGCG	59.400	47.619	1.600	TACCGAACACTGATGCTGC	58.602	52.632	2.398	131	3.998	A	10
176475	CTGATTCGTCGAGTGTTCCC	59.106	55	0.894	CCGAACAAAGGGCCAAGTG	60.084	57.895	1.084	112	1.977	A	12
176612	TGCAACTACAATTCAGCCCAC	59.874	47.619	1.126	TGGTCATAGCTTCAAGTCCCG	60.557	52.381	1.557	100	2.683	C	13
176676	ACGCCTTAGACCTTAGACCG	59.653	55	0.347	TATACCACCTGAGCTGTCGC	60.009	55	0.009	104	0.357	AAT	11
176785	GAGTGAGGTCTCGAGTGAATG	58.602	52.381	2.398	GAATTCAGTCGTGTTTGGAAGG	58.601	45.455	3.399	144	5.797	AAAT	9
176991	TTGCTGTCTTTGTAATTGGCC	58.098	42.857	2.902	GCGGTTTCTGATACTGCTACG	59.883	52.381	1.117	129	4.019	AAT	9
177368	TCGCGTTGTTAAAGTAGCCAC	59.948	47.619	1.052	AAACAAACACAAACGGGCCC	60.863	50	0.863	112	1.916	C	13
177478	CATGCCCTTCGTTGTTGAGG	60.223	55	0.223	GAGCTAATCACTCGTTCAGGG	58.934	52.381	2.066	125	2.289	AC	26
177783	ACCAGCTAACCAACTGACAAAC	59.815	45.455	2.185	TGGTTAGTTGGTTGAGCAGTTG	59.815	45.455	2.185	116	4.370	AACC	13
177816	CTCGTTCGGGTTTGTAGACG	59.395	55	0.605	GTAACGGCCTCTGTGACGAG	61.194	60	1.194	100	1.800	AC	11
177850	ACCATCTGCTATTCAAGTGCTG	59.488	45.455	2.512	CAGATAGTTGTGCGGCTGTG	60.013	55	0.013	138	2.526	A	10
177871	GTTATACCTCTGTGACTCGGTC	58.462	50	3.538	TTTCGGCAAACAGGTCTGC	59.713	52.632	1.287	105	4.824	AAT	17
177880	TTCCCAAACGGCAGTATTCTC	59.053	47.619	1.947	ATTGGTGATGGCTCTGCACC	61.448	55	1.448	100	3.396	A	13
177904	TTGAGTCAGTACCCTTACACAC	58.169	45.455	3.831	CAGGTTTGCTATCTGTTTGGC	58.527	47.619	2.473	114	6.304	AC	19
177919	ACTTCAGTAGACCATGCCCTG	60.215	52.381	1.215	CCAAACAACCCAAACAAACCG	59.744	47.619	1.256	103	2.471	C	17
177979	GGAACTGCATGTGTCTGCTG	60.222	55	0.222	ACCAACGCCGATTACAACAC	59.872	50	0.128	109	0.350	C	10
178178	ACAAACCTCGTTGTTGCCG	60.011	52.632	1.011	TTCTGGTGACCTACATGCGG	60.509	55	0.509	102	1.521	A	14
178391	CTACTGGACGTTGGTGGGAG	60.507	60	0.507	ATTTCACAGCCACCTTCACG	59.513	50	0.487	144	0.995	C	12
178464	GCACGCAACGCAACCTTAAG	61.723	55	1.723	CATCAGTGCTCCATTACCAGG	59.19	52.381	1.810	108	3.533	AAT	10
178618	GCCTTATACCGCACGTTCAC	60.084	55	0.084	ACGAATTTAAGGCGACGTCAG	59.749	47.619	1.251	116	1.335	A	10
178898	CAGCCCGGTTACAGTTACAC	59.308	55	0.692	TCGAAGAGTAAATGTGAACGGG	59.173	45.455	2.827	117	3.519	AT	11
179171	CTGTTTGGCCAGGGTACAG	58.804	57.895	2.196	TGCACACATGTATAAGGCTCAC	59.491	45.455	2.509	101	4.705	AC	19
179195	GGAACAGTGAAAGAGAGACCTG	59.101	50	2.899	ATGACACTGGGTTACTGGGC	60.442	55	0.442	138	3.341	A	10
179260	GCGGACGGACGGACATAAC	61.604	63.158	2.604	GGATCCTCACGAGTGTCCG	60.305	63.158	1.305	109	3.909	A	10
179325	CTGACATGTGCAGGCTTCAC	60.222	55	0.222	CTCCGATCCGCCAGTAAGAG	60.434	60	0.434	104	0.656	C	16
179575	CCCAGTACAATCTCTCGGTCG	60.684	57.143	1.684	AATGACGCAACAGCATAGCG	60.361	50	0.361	134	2.045	ACTG	8
179594	ATTTCGCCTCACTCTGTACG	58.462	50	1.538	GACATAAGTTGCCGCATTGC	59.183	50	0.817	106	2.355	A	10
179777	CACCCTCGGAGTGTGTAGG	59.859	63.158	1.141	GGAATGTGTGTCAGCCTTTACG	60.59	50	2.590	128	3.732	A	11
179858	GCCCACAACGCTGCATATTC	60.988	55	0.988	TGAATTTGACGTGTCTGGTGTC	59.884	45.455	2.116	117	3.104	AAAT	12
180102	GCACTAGAAGAAGATGTGAGGC	59.561	50	2.439	AGGTTAGGCGGTCAAGAATTTC	59.421	45.455	2.579	128	5.018	AAC	20
180393	CCTTTCTCTGCACGTTCAATTC	58.930	45.455	3.070	TTAGCGTTATACCCTTAGCCTG	58.169	45.455	3.831	111	6.901	A	10
180435	GCAAGAGCGGAACTGAGTAATG	60.398	50	2.398	TGTCGCCTTTCTCAACATGC	59.871	50	0.129	118	2.527	C	17
180803	TGTGTTGTGTAGGTAGCGGC	61.071	55	1.071	AACTCGGGTCTAGGCTGC	59.45	61.111	2.550	144	3.620	AC	8
180879	CTCAAACAACGGTGCCACTG	60.710	55	0.710	TTGCACTCACAAACGAAGCG	60.705	50	0.705	100	1.415	AC	15
180961	CAAGAAGCCTCAAGACTGCG	59.943	55	0.057	TTAAGACCCAGCACGACCTC	60.152	55	0.152	119	0.208	A	10
181029	TCTCACTGACCAAGCACTTC	58.220	50	1.780	GCCACATGCCTCACAATTTC	58.743	50	1.257	133	3.037	AAT	8
181244	AAACTATAAACGGCCGCGC	60.013	52.632	1.013	AAAGTCACGGCAAGGGTTG	59.334	52.632	1.666	133	2.678	C	14
181466	GTTTGTTACGTTCGGCAATGC	60.017	47.619	1.017	CCACCCTTTATGTCCACGTG	59.301	55	0.699	130	1.717	C	19
181575	GCTTAGAGGGAACGTTGGTC	59.022	55	0.978	GCGAGGCAGAAAGGAAGTG	59.57	57.895	1.430	148	2.408	A	11
181702	TCTCCCACTAGAAATACGCCC	59.732	52.381	1.268	AGAAACGTGGGCAATGACC	59.108	52.632	1.892	150	3.160	A	10
181758	TGATGGCTACGACGGTTAGC	60.645	55	0.645	GGAAGCCTGAAATCTACCGC	59.446	55	0.554	120	1.199	AT	9
182031	CGTCTCATGATCCGACTTGC	59.529	55	0.471	CGCCCATGTCACACCAAC	59.778	61.111	2.222	131	2.693	C	14
182045	CGTGGAGGTAGGAATGGGAC	60.295	60	0.295	GGTATGTGTCCCGCCTGG	60.558	66.667	2.558	118	2.853	C	18
182192	TACGCAGAACATCTTCCTGG	58.079	50	1.921	CATTCTGGCCTGTCATGTCG	59.731	55	0.269	103	2.190	A	10
182247	GAAAGGGAAGGAGGGAGGC	60.157	63.158	1.157	TGCCTCCTTCCCTTTCTTCC	60.078	55	0.078	136	1.235	AAGG	12
182411	ATGTGGAGGTCTCAGCAGTC	59.863	55	0.137	TGAAGTTCTTGTACATGGCCC	58.975	47.619	2.025	115	2.162	A	10
182628	AGAACAGGTAATTTGGCCACAC	59.878	45.455	2.122	GCTCTCACCCATTTATTTCAGC	58.456	45.455	3.544	101	5.665	A	11
182698	AGGCTGCTTCCTCTTTCATAC	58.491	47.619	2.509	CTGTCCTCATGCACACAGAG	59.022	55	0.978	137	3.487	A	10
182802	AGGAGGAAGTTACACCGGAC	59.500	55	0.500	CAGTCCACGTGAGCTGTATTTC	60.079	50	2.079	126	2.578	AAT	14
182821	TCACAAATGTTCGACACTGGG	59.537	47.619	1.463	GCCCAGTATTGATGGACCAC	59.077	55	0.923	105	2.387	A	13
182831	CCACCATTCCCGTTTCAGTG	59.869	55	0.131	CATGTTACACACCTCGCGC	60.302	57.895	1.302	148	1.434	C	21
182953	GTGGTCCTCGTGTGTAACTTTC	59.950	50	2.050	ACAGAAGAGGGAAGGACTGC	59.788	55	0.212	106	2.261	A	11
182957	TTAGCTCCGTTCAAACTCGC	59.313	50	0.687	GGTCTCTGCTACATGAAGTTGG	59.493	50	2.507	142	3.194	ACTG	6
183020	CAATATGGCGGCGGTCCC	61.718	66.667	3.718	TTCTGTGCTTCGACAACCAC	59.448	50	0.552	131	4.269	C	15
183116	CTAGTCCCTCGGTCATCCAG	59.435	60	0.565	GGAGATTAGCGTTGAGTGGTG	59.476	52.381	1.524	142	2.090	C	11
183740	AAGCAATCCACCGACCAG	58.024	55.556	3.976	TGGGTGGATCGAATAGGGAG	59.055	55	0.945	140	4.921	AATC	13
183882	ATATGTGTGGGTGGTAGCGC	60.937	55	0.937	TCAAGTTTCCGTTTACTGTTGC	58.468	40.909	3.532	105	4.469	A	12
183991	TCCACGAACTGCAAAGCTTG	60.082	50	0.082	CCAATGGGTTCAACAGGGC	59.781	57.895	1.219	111	1.301	C	13
184613	GACGTTAACACTCAGGCAGG	59.311	55	0.689	CCAGAACTCAACACTGCTACG	59.681	52.381	1.319	114	2.008	AAG	14
184802	AACTCATACGGCGTTGCAAC	60.222	50	0.222	TAATTGTCTGCAGCGCCTTC	59.659	50	0.341	105	0.563	A	10
184820	CTAGCCACAACTAACGAACGG	59.749	52.381	1.251	AGACAGACCACTTACGAGCC	59.866	55	0.134	132	1.385	A	11
184943	GCTGTCCGTTGTTCCGAC	59.479	61.111	2.521	GTCTGTACGTTGTGGCACTC	59.597	55	0.403	117	2.924	C	18
185173	CAGGCAGGCAGATAGGTCG	60.677	63.158	1.677	TCGGTGAGTGGTGTTCTGAC	60.365	55	0.365	101	2.042	AGGC	6
185251	AAAGTGTCGTCCGATTGCC	59.198	52.632	1.802	ATTCAGCCGCCATTTCCTTC	59.651	50	0.349	142	2.151	A	10
185551	GCGACTATCAGCTTCGTCATG	59.950	52.381	1.050	AACCTAATTGTTGCACGCGG	60.502	50	0.502	110	1.552	ACGG	12
185752	ACAGGTCTTCGAGCCATACC	59.936	55	0.064	AACATACACCGTCAAGACCC	58.288	50	1.712	120	1.776	A	12
185799	ACTGTGAAGAGACTCCATTGTG	58.764	45.455	3.236	AGAAATCTGGGAGCCTCGAC	59.935	55	0.065	105	3.300	A	11
186028	AAATGCGCATAATCCTGTCATG	58.522	40.909	3.478	CGCAGCTTAGAGGGAACAATG	60.08	52.381	1.080	118	4.558	A	11
186260	AACCAGCCACTGTAGTCTCC	59.789	55	0.211	GGTCCATGGCTCAATCACTG	59.367	55	0.633	112	0.844	A	10
186375	CCTGTAATGGGACTGCTTTACC	59.486	50	2.514	ACGCAATGTGAGAACCATGTAG	59.754	45.455	2.246	122	4.760	A	11
186640	GGATTGTGGGTTCGAATCCC	59.366	55	0.634	CGGTAGGACTTCTCTGGACG	60.011	60	0.011	119	0.646	A	10
186980	CATTTGTCCCTGTCCTGAGC	59.296	55	0.704	CCACCTTATCTTGGCAGCAAC	60.282	52.381	1.282	100	1.986	C	13
187099	ACTCCCTTGCTACAGACTCG	59.579	55	0.421	CCTTTGTGTTGTTGATACTGGG	58.254	45.455	3.746	100	4.167	AC	10
187311	AGGCCTGTGACAAGAGACTC	59.791	55	0.209	CTTAAGGGACCATCGATTCGC	59.611	52.381	1.389	102	1.599	AAT	14
187398	CGTAGGCTTAGTTGTAACGGC	59.816	52.381	1.184	TGAACGCGACAGACAGAC	58.094	55.556	3.906	136	5.090	AGGC	15
187715	GGGTCGACTCAACCTCTGAC	60.506	60	0.506	TCCGGCTCCCAGATTTCAAG	60.512	55	0.512	134	1.018	C	15
187949	GTGTGCTAACTCAACAGGCG	60.222	55	0.222	CTGTGCTGGCTTTGTAATTGAC	59.18	45.455	2.820	129	3.042	AATTC	7
188008	GACCAGCAGTGCCGATAAC	59.351	57.895	1.649	TGTGCTCTTCGTTCTTCCCG	61.067	55	1.067	114	2.716	C	13
188191	ACGTGTCAGGCGAACTCC	60.397	61.111	2.397	CGGAGGCTATGAATGTGCTC	59.237	55	0.763	143	3.160	C	14
188214	TGTGGATAAGTGCAGATGGG	58.048	50	1.952	TCATAATATGCAGTCCCTTCCC	58.137	45.455	3.863	114	5.816	A	19
188318	AAACAGGCTTCGCGTAATCC	59.660	50	0.340	GTGTCAAGTGTAAGCCGTCG	59.946	55	0.054	148	0.394	C	15
188571	GAGGACCGTAACGTCAGAAG	58.477	55	1.523	ACGACGCCCTACAGATCTTC	60.01	55	0.010	138	1.534	AAG	9
188613	ACAAGTGAAGAAGGGTGTCC	58.123	50	1.877	CCCTACACTCCTCCCTCCC	60.852	68.421	1.852	123	3.730	AAGG	8
188705	TGACATATTCCTTCCGGCCG	60.652	55	0.652	AGGTGGTAAGGTTGTCAGCC	60.369	55	0.369	131	1.021	C	10
188944	TGCGCTTAAATGTTCCCTGG	59.581	50	0.419	TGCCTGCACACTTCTTTGTC	59.726	50	0.274	123	0.692	A	11
189001	TCCATCCATCCGGCTATCTAC	59.314	52.381	1.686	AAATGGATGGATGTGTGGGC	59.279	50	0.721	143	2.407	ATCC	13
189037	GTCTCCTCTGAATGTTGCGTG	60.014	52.381	1.014	AGTCGGGCCAGGTGATTG	60.084	61.111	2.084	139	3.098	AC	18
189161	GGCCAAGACTGCCACATTG	60.158	57.895	1.158	AAGGTGATCGCTCGTCCAG	60.232	57.895	1.232	126	2.390	AC	26
189250	ACAAGTGAAGAAGGGTGTCC	58.123	50	1.877	TTCCTGCCAACCTACCTTCC	60.078	55	0.078	128	1.955	AAGG	8
189380	TCTGCCGGCCTCTGATAATG	60.367	55	0.367	GTTCCCAAAGCGCACACAG	60.741	57.895	1.741	138	2.108	A	10
189496	GGCGTGGCAGGTTATATTACG	59.947	52.381	1.053	CTGTTTCTGTCTTGCCGTCG	60.222	55	0.222	128	1.275	C	10
189776	GCCTCTGCTCCATGAAGATAG	58.714	52.381	2.286	CGACAAGAGGCAGCATGTG	59.939	57.895	1.061	108	3.346	AACT	9
189891	ACCCTTAAACGCTTCACATGTG	60.207	45.455	2.207	GAAGCTCGGATTCATGACGG	59.525	55	0.475	106	2.682	A	10
190272	CTCAACCACGGCATTAGGTG	59.659	55	0.341	TTGCTCTCCTATTCCGTTGG	58.066	50	1.934	102	2.275	C	10
190296	TTCACCGTAGCCAGGCAC	60.400	61.111	2.400	TACACCCACAACTTCCCTGG	60.005	55	0.005	136	2.405	C	10
190310	GAAAGCCTGCTAAGCCATGG	60.010	55	0.010	GCCACAAACCTCAAGACCAC	60.081	55	0.081	135	0.091	AC	9
190539	GTAGAATCCCTTAACGCTCGC	59.615	52.381	1.385	AACTAACAAACGGCGACCAG	59.52	50	0.480	122	1.865	C	13
190892	GCACCTCTTAGCCTTAACCAC	59.399	52.381	1.601	TGCTGTGTGGGTGTGAAAC	59.26	52.632	1.740	105	3.341	A	10
190919	GTTGACACTCGAAGCCACG	59.870	57.895	1.130	TAGGCAAGCACAAATCCCAC	59.216	50	0.784	106	1.914	AAAT	6
191195	GGTTGATCCGAACACCTGAC	59.306	55	0.694	TCAGCATTCCCGGTACTTCC	60.224	55	0.224	129	0.918	C	14
191279	TGGCTTCGTGTAGTCCCTTC	60.152	55	0.152	GCCTTGAATTGTGTCCAGGG	59.866	55	0.134	124	0.286	CCG	8
191567	ACACGTCCACATAGCTTAGGG	60.283	52.381	1.283	CGCGCCGCCTGAAATTATC	60.805	57.895	1.805	120	3.088	AC	8
191791	GTTGCAACTTTCTTCGAACTGC	59.954	45.455	2.046	AGGAGTGTTAAATCCAGGGTTC	58.474	45.455	3.526	103	5.572	A	12
191848	TTTCCAGACGCACGCTTAC	59.208	52.632	1.792	CACTTGTGCTGTTACGCCTG	60.499	55	0.499	131	2.292	AAC	18
191953	GGAGCAAATAAGATGAACGCAG	58.800	45.455	3.200	GCACTGTCACTTTCATCAACTG	58.864	45.455	3.136	113	6.336	A	12
191973	AAACTAGCCTAGCCTAGCCC	59.347	55	0.653	GGGTTTGGTCTGTTTCGGTC	59.799	55	0.201	120	0.854	C	11
192041	TCAGTAATATGGACTAGCGCCC	60.207	50	2.207	TTTGTGCGCTGATTCTTCCC	59.869	50	0.131	119	2.338	C	14
192103	TGCTTGATACGAAGGCTTCAC	59.404	47.619	1.596	AGAAAGGCTCGGGTGAACG	60.753	57.895	1.753	141	3.349	A	12
192204	TACTCATGGTCACGGTGCG	60.527	57.895	1.527	GCAACAATGTACCAGACGATTC	58.74	45.455	3.260	118	4.787	A	11
192212	GCCAAGGAACGGTGCATTC	60.525	57.895	1.525	TTACGCAAATCCTACGATCCG	59.009	47.619	1.991	100	3.516	AT	8
192343	ATGGACAGTCGGATGGATGG	60.006	55	0.006	TCCATCCATTCATCCGACCG	60.367	55	0.367	133	0.373	ATCC	11
192487	ACAGGCAGGTGTGTAGTTCG	60.720	55	0.720	CCCAAGATACAACGATCCGC	59.522	55	0.478	113	1.198	A	12
192535	GGTACTGGTGTCCCTTGGG	60.081	63.158	1.081	GTGAACGAAACAAACACGCG	59.884	50	0.116	118	1.197	C	10
192544	GGTTATCGCCTTGCCAGATG	59.799	55	0.201	AGGACTGACAAGGAGAAGACTG	59.877	50	2.123	112	2.324	A	11
192745	TCCTGAAACCTTCCTCGCTC	60.152	55	0.152	TTGCGGTTAATTGTTGGCAC	58.602	45	1.398	128	1.550	C	15
192856	GGTGTGATGTGACTGTGAATTC	58.339	45.455	3.661	AACCGTCTCACCGTTGTTTG	59.731	50	0.269	118	3.929	C	21
192989	ACGTTGAGGTTTCTAGGACAC	58.374	47.619	2.626	TTTAGATAGCGGCGTCTGGG	60.365	55	0.365	144	2.991	AC	23
192991	GTCATCTTCTCTTGCTCAAACC	58.075	45.455	3.925	AATTTAATTTCATCGCCCAGGG	58.097	40.909	3.903	124	7.829	A	12
193035	CTCTGCTTCCGTCCTCAGG	60.232	63.158	1.232	GCCTGGCTTCCGTCCTAC	60.555	66.667	2.555	121	3.787	C	15
193071	TGGACGCTGTAGAGAAGACG	59.941	55	0.059	TGCCGCTCTAATAATGTTCTCG	59.37	45.455	2.630	112	2.688	AC	10
193153	TCAAGTAGGCAGGTAGGTGTAC	59.678	50	2.322	TACGTGCACACCTACCTACC	59.58	55	0.420	115	2.742	ACCT	6
193446	AAACGAATTTAAGAGGTCGCG	58.019	42.857	2.981	CGTTCAAAGTTACGAAGCACTC	58.949	45.455	3.051	102	6.032	A	10
193477	ATGTGACAAGTCGTACGCAC	59.319	50	0.681	AAATTTCCACAATACCACGCTC	58.322	40.909	3.678	104	4.359	C	23
193696	GAATGCGAAGGTGGAAGTGG	59.941	55	0.059	GTGGTCGTTGGTTGTGTTTAAC	59.315	45.455	2.685	102	2.744	C	13
193729	TCAATGCTTTCCGATGCGC	60.304	52.632	1.304	CTCCTGCACGAACGTATCTG	59.182	55	0.818	121	2.122	C	11
193915	GATATTTCCAGAGCAGGTAGGC	59.094	50	2.906	TTCTTACCTGCACAGAAGTCC	58.36	47.619	2.640	132	5.546	A	12
194101	GACACACAACATGCGAGTGG	60.499	55	0.499	CAGTTGTTCACGGTGATGGG	59.871	55	0.129	107	0.629	C	11
194345	TTGTGCTTTGTCTGATAACTGC	58.265	40.909	3.735	AAGCATTGTTTGTCACTTCCTG	58.447	40.909	3.553	100	7.287	AC	12
194376	TTGCCCTGTAACATGCTGTG	59.509	50	0.491	GGGAGTGGTGCTGTTCATC	58.887	57.895	2.113	111	2.604	C	13
194528	AATGTCTTAGTGTAGTGGCCTC	58.294	45.455	3.706	GAGTGTCCAGAGATGGGTCG	60.294	60	0.294	139	3.999	AC	13
194595	TGCGTAATAACCCATAACAGCG	59.885	45.455	2.115	GCATAAGTTCACAGCCTCGC	60.361	55	0.361	110	2.476	A	11
194987	GTTTGTGGGTTGGGAACGG	60.009	57.895	1.009	CCGAACCACCTCAGATTCCC	60.867	60	0.867	100	1.876	C	12
195069	CAACACCCTATTCTCGAACACC	59.755	50	2.245	GACTCTCAAAGGGTTTCTGGC	59.602	52.381	1.398	107	3.643	A	12
195086	CATTACCCTACACTGCACTTGG	59.751	50	2.249	TCAGGCGAACAGACAGCAC	61.044	57.895	2.044	132	4.292	A	12
195341	GGAATGCAATGGACAGGGAC	59.651	55	0.349	CCTGCATTTAACCCACTGACC	59.942	52.381	1.058	137	1.407	C	16
195544	TGTAACACGACTGAGATCTGAG	58.067	45.455	3.933	CGCAAGGTAGAAGAGGATCG	58.612	55	1.388	128	5.321	AAGTG	10
195751	TGGGAAGCTGTTATCACCGG	60.511	55	0.511	CCGTTACAGCATGTTCAGGG	59.659	55	0.341	127	0.853	A	10
195924	CCAAACATCAATAGCATGGCAG	59.042	45.455	2.958	AACGCACTGTCTGTTTCGAC	59.806	50	0.194	100	3.152	A	13
195938	CGCGCGTACTGTTAATGGTG	60.698	55	0.698	TTGCAACATTACAATCGATCCC	58.126	40.909	3.874	124	4.572	ATC	8
195986	GAGTTGTTCTTTCGCTGGAGG	59.946	52.381	1.054	GACCCAGACTGCTTGTTGAG	59.231	55	0.769	101	1.823	A	10
196044	TGACCCTGTAGATGAAGGCG	59.936	55	0.064	GACTGGCTGAGAAACTGTTAGC	60.014	50	2.014	118	2.077	AACT	6
196405	TGAACCGAATTGAACCACCAC	59.807	47.619	1.193	TTGCTTCCCTTCCGTTGTG	59.035	52.632	1.965	139	3.159	C	25
196947	CGCGAGTCCATAATCTGCAG	59.598	55	0.402	ATCACATGACTGACTGCCTG	58.358	50	1.642	132	2.044	A	11
197016	GGCCGATCCCTCTTCCAG	59.926	66.667	2.074	ACCTCTTCGACCTACTCACTG	59.324	52.381	1.676	116	3.750	AC	9
197094	CTGTTCCGACTGCAGATTCAC	60.014	52.381	1.014	TGAAGGCCCATGATCCATTTAG	58.941	45.455	3.059	122	4.073	AACT	12
197266	GCGACCATTAAGCTTTGTCATG	59.315	45.455	2.685	ATGCGGACAGACAGACGG	60.164	61.111	2.164	105	4.849	ACGG	11
197281	ACATGTCACACTGCACAGC	59.417	52.632	1.583	AAGTGGTCTCGTCCTGATGG	59.864	55	0.136	135	1.719	ACAGC	8
197415	TCGTGTGTGATCTAGAAACCTC	58.321	45.455	3.679	ACCTGCTGAATACAATGCCATG	60.076	45.455	2.076	104	5.755	A	13
197495	AAATCTTCGCACTCATTCTTCG	58.156	40.909	3.844	GCCACGATATTTGTTGCTCTG	58.682	47.619	2.318	110	6.162	A	12
197558	GCGGAAATGTTGTAACTTCTGG	58.925	45.455	3.075	AGACTTTCCATCTCAGGTGTG	58.073	47.619	2.927	118	6.001	A	10
197688	TGCTCACAGTACCTCTCCAC	59.504	55	0.496	ACTGCAGTTAGTATCAACCTGC	59.162	45.455	2.838	117	3.334	A	10
197715	CCCTTCGCACACACACTTG	60.085	57.895	1.085	AGTTCGTCTAAGAGCTCGATG	58.061	47.619	2.939	120	4.024	AC	33
197951	ACGAACTAAAGATGTGCGGC	59.663	50	0.337	GGTTCAAAGATCACGGAGCC	59.659	55	0.341	105	0.678	C	12
198253	TGGTATGTCGAATTGAGTGCG	59.478	47.619	1.522	ACGTCAAATAGCTACTTCTCGC	59.311	45.455	2.689	144	4.212	A	10
198297	CAAACACGTGGACAGATCGG	59.944	55	0.056	TGCTCCACTGTTACCCGC	60.4	61.111	2.400	105	2.455	C	10
198428	AGAACCGTGGCATTTCGTTG	60.152	50	0.152	ATTACAGTTGGTGGAAAGCCG	59.6	47.619	1.400	108	1.552	A	11
198596	TGTCGGTCTTCTAGGTGTGG	59.505	55	0.495	CCGGACAATTCTACAAGCCG	59.733	55	0.267	121	0.762	C	13
198808	TCCGTAGTTCTGATAGTCGCC	59.808	52.381	1.192	GAAGCTGTGTTATTCCGGCG	60.361	55	0.361	121	1.552	AAC	10
198947	CCGCGCGATCACTTATGC	60.165	61.111	2.165	TGTTCGCGTGCACTGTAATG	60.222	50	0.222	106	2.387	AC	30
199004	GGCTGTGCACCAAACATAAAC	59.343	47.619	1.657	ACCGCTGCTATCATTATCAACC	59.359	45.455	2.641	141	4.298	AAT	9
199091	CCGCGCGATCACTTATGC	60.165	61.111	2.165	CTGTTCGCGTGCTATGTAATG	58.505	47.619	2.495	107	4.660	AC	30
199153	GTGCTATCTCTTGGTTGTCTCG	59.566	50	2.434	TGAATCTTTATGCAGTGTGGCC	60.011	45.455	2.011	126	4.445	A	10
199176	AAACAACTTCTCCGCAAACAC	58.601	42.857	2.399	GCAGCATCACCTCTTATTGTTC	58.466	45.455	3.534	139	5.933	AC	8
199193	TTGGTTCTAACTGGTCACTCG	58.375	47.619	2.625	TGCCTCCTTCTTCAGAGGTG	59.788	55	0.212	104	2.836	A	10
199237	GCAGAGAAACAAACCTTCAGC	58.739	47.619	2.261	CATATATGGAGCTTGCCCTGC	59.669	52.381	1.331	107	3.592	ACGC	8
199279	TGCACTCCAAGTAAGCAAGC	59.513	50	0.487	CTGCTGCTATACAAACTACGGG	59.628	50	2.372	145	2.859	AC	24
199342	TGGTGGTGCGTCGGTATAG	59.935	57.895	1.065	CCCGTTCTTTCCATCATCCC	59.077	55	0.923	142	1.989	A	13
199460	ACGGGTGTAGTCTGCTTAATAG	58.111	45.455	3.889	CATAGGGTCGCACAATAAGCC	59.877	52.381	1.123	105	5.011	A	11
199562	GTGTCCGTCATCAAAGCGG	59.941	57.895	1.059	GCCCTGAATCCAATACTCGG	58.868	55	1.132	100	2.191	C	15
199563	TTCACAACAGACATCGGTGC	59.519	50	0.481	TTCCTTACACACCACCTCCC	59.712	55	0.288	134	0.769	C	32
199563	TTCACAACAGACATCGGTGC	59.519	50	0.481	ATTCCTTCCTTACACACCACC	58.337	47.619	2.663	139	3.145	C	32
199623	CCACCCATTCTTAACTTCGGC	60.011	52.381	1.011	CCGGTCTGGTGTGGGTTC	60.714	66.667	2.714	120	3.726	C	13
199799	ATGATTTGTTGCCACTTCAGC	58.446	42.857	2.554	ACAGTCACTAGCAGGTTCGG	60.152	55	0.152	110	2.706	C	10
199898	GACGGGCTGATCAACCATTC	59.729	55	0.271	ACTGTTGAGGTGCGTAGGTC	60.436	55	0.436	110	0.707	AC	23
200022	TGGGCAGAACGTAGAATTTGTG	59.947	45.455	2.053	GTGTGTTTATTGCGCGGTTG	59.674	50	0.326	101	2.378	AT	15
200128	AGCATTGACAAGAGGAGCTC	58.357	50	1.643	GCTAGTGTGAAAGTTGTCGAAC	58.622	45.455	3.378	106	5.021	A	15
200275	GTTTGTCGCCATTTACGTGC	59.400	50	0.600	GCGCTGATACATGCTGACAG	60.153	55	0.153	139	0.753	AG	13
200321	CAGCCATGTAGACTGTCAGAAG	59.236	50	2.764	GGTTCAGAGTGCTTTATGACAC	58.08	45.455	3.920	103	6.684	A	11
200580	CACCAACACCGTCATTAGTCC	59.676	52.381	1.324	GGTACAATTACTCCACGCGG	59.454	55	0.546	116	1.870	A	10
200750	AAATGCTGCAAGAGGACTGG	59.217	50	0.783	TCTTAACCTGAGGCAGCCG	60.157	57.895	1.157	103	1.941	C	14
200818	AAAGGAACGTGTCTGCAACG	60.083	50	0.083	GGCGACAGTGGTTCATTCC	59.568	57.895	1.432	100	1.515	A	13
200914	AATGTGCGCCTATGTCTTGC	60.011	50	0.011	AGCAAGTTGAGATGGGCGAG	61.149	55	1.149	104	1.160	A	11
201078	AGAAGAGGATCGGACTGAGTG	59.390	52.381	1.610	ACCACCACCACCAATTTAGTC	58.898	47.619	2.102	132	3.711	AAGTG	7
201095	CGTAGAAAGGAAGCGTGCAG	60.015	55	0.015	ATTATGGTACCTTGGCCGGG	60.297	55	0.297	139	0.312	A	27
201304	TAGGAATGGTGGGTGACAGG	59.490	55	0.510	TCCTGTCCTTCTACGACTGC	59.58	55	0.420	142	0.929	C	16
201669	CTGCATGCAAGTTACATCAGC	58.947	47.619	2.053	GCTGGTTGAGAAAGGCATCC	59.939	55	0.061	115	2.114	AT	8
201897	GCCACAGCGTATAATTCGTG	58.081	50	1.919	CTCTCTTGCACCCTTCCTTC	58.648	55	1.352	100	3.270	AAG	12
202025	TTAACAGGCAGAGTTCACGC	59.236	50	0.764	TGTGATCCAAATAGCCGTGC	59.371	50	0.629	118	1.393	AC	20
202277	ATGAGTCCTGCTGCATCTCC	60.296	55	0.296	TGAAGAATTGGTACTGACACGG	59.1	45.455	2.900	108	3.196	C	11
202872	CCGTGGCAGATGAGTTTCG	59.648	57.895	1.352	TCGCAGATTATGGCACCCG	60.975	57.895	1.975	139	3.326	C	13
202956	GATCTGTGCCCACGTTCAAG	59.942	55	0.058	ACAGGGATGTGTTGGATGGC	61.094	55	1.094	124	1.152	C	13
203198	TCGAACAAATGGGAGTCACG	58.954	50	1.046	GTTTCACCTCGCCTCACAC	59.499	57.895	1.501	105	2.548	A	12
203198	AACCAACCGATCACAGGTAC	58.288	50	1.712	TCCTAGAAGAGCGGAGAGTTC	59.117	52.381	1.883	101	3.595	C	10
203340	CGAACGGTTGGCATTTAGGG	60.293	55	0.293	TCATTCACTGCACAAACCGC	60.433	50	0.433	108	0.725	AGG	8
203405	AGACACTATAATACGGCGCATG	59.176	45.455	2.824	TAAACCAACATTGAGGCGCG	60.222	50	0.222	144	3.046	AC	12
203648	TCAGTCGGCAGTGCAATATG	59.091	50	0.909	CGTGGTCCAACTGTGCAC	59.704	61.111	2.296	107	3.205	C	11
204228	GCCATCCAGTCATTTCGGG	59.338	57.895	1.662	CGTTGCGAATGGTGCAGG	60.545	61.111	2.545	128	4.207	A	15
204292	ACCAACGTTCAGATCTTGGC	59.227	50	0.773	ATGGCCAGTCTTAAGCTCCC	60.224	55	0.224	131	0.997	A	10
204484	TGTAAACACGCTGCTGACG	59.505	52.632	1.495	CATTGATGATATGCTCCGCCC	60.012	52.381	1.012	111	2.506	C	17
204519	GAGCAGTGCCGACGACAC	61.826	66.667	3.826	ATGCAACATTGTCCGACTCC	59.298	50	0.702	104	4.527	C	10
205137	ATGGCTTGGTAGGTGGAAAC	58.551	50	1.449	AGACAGTGTAGAGAGATGCCG	59.738	52.381	1.262	117	2.711	A	10
205394	TAATTGTGTGTTGGGACCGG	58.859	50	1.141	GGTACTTAGGCCACTCACCC	60.224	60	0.224	124	1.365	C	10
205410	ACGAGGGTAGCACTTGTCG	60.158	57.895	1.158	TGCTTCATCTGTACCTTGGAAG	58.825	45.455	3.175	102	4.333	AC	15
205480	AGATTCCCAACAGAGGCAGC	60.802	55	0.802	GCTTCTGATAGGCGCTGAAC	59.804	55	0.196	101	0.998	C	13
205615	ATGAGGGATGCAGTGAGAGC	60.296	55	0.296	TGCGGATAAGGGATATTCAACC	58.754	45.455	3.246	144	3.542	AAC	18
205842	GCGCGCATGTGAAGATCAAG	61.314	55	1.314	TGCCGAACTTTCTTTAGCGG	59.59	50	0.410	125	1.725	C	16
206030	ATTGTGATTGGCAGCTCATTG	58.236	42.857	2.764	AGACTGTAACCTCCCACTGC	59.789	55	0.211	113	2.975	A	13
206074	TCTAGACAGTCGGCACATGG	59.938	55	0.062	CATCCTCATCCACCACACCC	60.873	60	0.873	126	0.935	C	14
206077	GTCGTATAACTTGCTGTGCCG	60.411	52.381	1.411	GGGTCATCGATAGCTACTCCG	60.282	57.143	1.282	100	2.693	A	10
206139	ACATGATGTGGTTCAGATGGG	58.760	47.619	2.240	TTGTCACCCAACCAACCCAC	61.455	55	1.455	127	3.695	C	19
206139	ACATGATGTGGTTCAGATGGG	58.760	47.619	2.240	TTGTCACCCAACCAACCC	58.07	55.556	3.930	127	6.170	C	19
206221	ACAGTAGAAGAATTGACGCTCC	58.907	45.455	3.093	AAACAGGGTGCCGAAGAAGG	61.301	55	1.301	100	4.394	A	10
206229	CGGGTGTAACGTCTGTATCG	58.910	55	1.090	AACTCCGCCCTAACAATCCC	60.514	55	0.514	111	1.604	C	14
206602	TTTAGCCAGCTCGCCCTTG	61.130	57.895	2.130	TACCCATTTGAATTAAACGGCC	58.041	40.909	3.959	100	6.089	C	20
206674	GTCACCCACGTTTCTGCAAC	60.709	55	0.709	TTGTGCGTGGTGGTCAATTC	60.082	50	0.082	127	0.790	ATC	10
206692	AAATTTCTGGGAGGGCTGC	58.782	52.632	2.218	GAATTTGGACATAAACCTGCCC	58.638	45.455	3.362	105	5.580	A	19
206827	GTCGCAGGTATGTATCAGAGC	59.077	52.381	1.923	AGAAATCTGGGAGCCTCGAC	59.935	55	0.065	108	1.988	A	10
207031	CCGTCAGATACTGCACAATCAC	60.143	50	2.143	ACTTCCTCACTTCCCACGTC	60.08	55	0.080	117	2.223	C	13
207191	AGGCCACAAACTAAGTTCTGAC	59.289	45.455	2.711	CAGTTGCGGAAAGTTGTCTC	58.063	50	1.937	132	4.648	A	10
207659	CAAGAGTGGAAGCTGTGTCAC	59.878	52.381	1.122	AGCCACTACAATACCTCCAAC	58.138	47.619	2.862	134	3.983	A	13
207693	GCGACTGTTAGCTTTGTTCTG	58.560	47.619	2.440	AACCCACTTGTTCCATGCG	59.409	52.632	1.591	118	4.031	ACGG	14
207709	TGTCTCCATGTTCAGCCCTG	60.441	55	0.441	TGACTCGAACGACTGCAGG	60.452	57.895	1.452	119	1.892	C	11
207792	TGCAAAGGGAAGTGAAACCG	59.725	50	0.275	CCGAGTTGTTTCCTGTGGG	59.116	57.895	1.884	131	2.160	AC	29
208013	GCGTCTAGGTAAACAACAAACG	58.945	45.455	3.055	TGCAGCTGGTGTCTCTGG	60.005	61.111	2.005	112	5.061	AT	8
208126	AACCGAGTTGTTCCATGCG	59.494	52.632	1.506	GGAATCTTTGAGGCGCCTTC	60.011	55	0.011	121	1.517	ACGG	9
208172	GCTGTTGACTGTGTACTGCG	60.222	55	0.222	TTTCTGGTTGGGTTGTTGGG	59.278	50	0.722	129	0.944	C	11
208438	AGTTTAGCACTTCGAGACCC	58.007	50	1.993	AAACTAACTTGCTGGCCGGG	61.656	55	1.656	109	3.649	C	10
208512	GACTCCGACTCCACCTGAAC	60.506	60	0.506	AGAACAAAGACTGAGGCCAAC	59.186	47.619	1.814	141	2.320	A	13
208578	GTGCATGGCTGTTTGGAGAG	60.223	55	0.223	CTTCCATATTTCCGTCCGTCC	59.27	52.381	1.730	131	1.953	ATCC	18
208750	GTAGTTCCAACAGCACGCAG	60.222	55	0.222	TTTGTCAATTCGCGGTGCTC	60.5	50	0.500	124	0.722	AC	10
208851	TGAGTTGTGGAAGGAGGGAG	59.420	55	0.580	CTGCGACACAACTTCAACTG	58.355	50	1.645	100	2.225	AAGG	10
209021	TGCCTTCAAATCACGTAGCC	59.301	50	0.699	TGCGACGTCTCTACCAATATTC	58.79	45.455	3.210	102	3.910	C	11
209227	AGCTACAATTCCGCCTCCC	60.233	57.895	1.233	TGAATACCCAGCATCGAGGAG	60.078	52.381	1.078	127	2.311	AAT	11
209236	GCGACGCTGTTTCAACCC	60.468	61.111	2.468	TGGGAATTTGGTGTAGCAGC	59.216	50	0.784	119	3.252	C	12
209380	GAGCGACCAGGTTTCCATTC	59.659	55	0.341	TCCGCTGGATATGCAATTAGG	58.704	47.619	2.296	104	2.637	A	11
209443	AGTTTAGCACTTCGAGACCC	58.007	50	1.993	AGCTGAAGTGCCTAAACTGTG	59.26	47.619	1.740	139	3.733	C	10
209687	GGCAGTACGTGATGTGTGAC	59.666	55	0.334	CGAGAAAGCGAAGAGTGGTTC	60.015	52.381	1.015	134	1.349	A	10
209873	TTCACGCAGGCCACCTTTG	61.944	57.895	2.944	GTCGTGTTTGCTGCGATTTG	59.676	50	0.324	141	3.268	C	13
209882	TCGGAGAAAGTTAAACCACGC	59.610	47.619	1.390	TGCTCCTACCAATATACGTGTG	58.444	45.455	3.556	125	4.946	AC	23
209926	CCCATTGTTTAGGGTGAGAACG	60.012	50	2.012	CAACAGTTTAACACGAAGGGC	58.746	47.619	2.254	142	4.266	AC	22
210140	AACCTCGCCACTGGATGAAC	61.081	55	1.081	CGGATACATTTCTGCCACGG	59.803	55	0.197	114	1.278	C	15
210409	TGTGGGTAATGCTGCGAAG	58.892	52.632	2.108	TGCTTATTCTTCAGGGCCTAC	58.207	47.619	2.793	115	4.901	C	12
210435	ACGGGTTGATTTGTTGGCTG	60.081	50	0.081	CATCATCGCCGCCATCAC	59.782	61.111	2.218	101	2.298	AAC	11
210695	TGGTGGAATGATACTGACAGGG	60.274	50	2.274	ATGTCCACCCAGTACTCCAC	59.495	55	0.505	137	2.779	C	10
211120	GTGTTACAGGGTTTAAGGCCTG	59.946	50	2.054	CCCAAGAGATACAAACCCTCG	58.851	52.381	2.149	133	4.203	AC	8
211174	GTGGCTTTCCTCAGAACACG	59.872	55	0.128	ACACGTGAATGTTGAACCGC	60.431	50	0.431	100	0.558	A	11
211179	CGAGGGATCTGTAGAGCGAC	60.152	60	0.152	CATACATTCTCGCTGCTTACTG	58.037	45.455	3.963	103	4.116	A	10
211514	GAACATGTTTCGGCTGCAG	58.337	52.632	2.663	ACGTGGCTAATTGTGAAGTGAG	59.689	45.455	2.311	132	4.973	AT	10
211654	GGGTTAACAGCTCGGGAC	58.126	61.111	3.874	GAGTTGCGTCCCGAGCTG	61.537	66.667	3.537	101	7.411	A	10
211790	ACACCAACAAATGCACAAAGAG	58.973	40.909	3.027	ACCAAACCACACCGCACC	61.58	61.111	3.580	103	6.607	C	10
211903	TGAGAATTGAACAGGCGCAC	59.871	50	0.129	AGAATCAGACCCGCAAGTTTG	59.603	47.619	1.397	129	1.527	A	11
212145	GGGAGGGAAGAACGTACGG	60.232	63.158	1.232	AGAGGAAGGTGCCAATCGAC	60.51	55	0.510	132	1.743	A	13
212234	TCGCAACTACCTCACGATCG	60.639	55	0.639	AACAATGTAGGGAGGGAGCC	59.857	55	0.143	118	0.782	C	10
212307	TTTCGACCATTACGTGCAATC	58.008	42.857	2.992	GCCATTACGACAGACATGCC	60.083	55	0.083	118	3.075	A	14
212389	TCGCTCATAGTTCGTGACAC	58.478	50	1.522	ATAACCCTCACCTGTTTCTGG	58.052	47.619	2.948	105	4.470	C	11
212518	ACTTTGTAGACGGCATAACTGG	59.164	45.455	2.836	TAGGAAGTTGTGCCGTTGTG	59.16	50	0.840	107	3.676	A	15
212727	GCCTCAGAGCTGGTCATGAC	61.214	60	1.214	CGACTGCAGAGACTAGGAGAC	60.08	57.143	1.080	135	2.294	A	10
212897	AGCGCCAAATATGTCTACAGTG	59.559	45.455	2.441	GTTTGTAGTACTTGGTCTTGCG	58.357	45.455	3.643	141	6.084	AAT	8
213231	AATCCGCGAGCAATCAAGTG	60.012	50	0.012	CTCTTCTCTCGTCAGCCCTG	60.293	60	0.293	118	0.306	C	14
213247	TGCCCTGTTACGCCATTGG	61.433	57.895	2.433	AAACGGGCTCAGCTCTACC	60.157	57.895	1.157	109	3.591	C	12
213266	TCCAGTGAAAGAGACCGACG	60.152	55	0.152	TCGCTTACTGGCTTGGGTAG	60.223	55	0.223	117	0.375	A	11
213276	ACTGTGAGCCGAGATGTTCC	60.508	55	0.508	TTTCTTCGTCTTTAGGCGCG	59.668	50	0.332	141	0.841	ACAG	9
213341	GGGTGGCTTAAGTTCGTACG	59.385	55	0.615	GACGCTGTTGGTTACCGTTC	60.222	55	0.222	136	0.837	A	11
213530	AGTCGGTTAAGGTAGTGAGGC	59.941	52.381	1.059	TTGCTGTTTGTGCCACCAG	59.934	52.632	1.066	115	2.126	C	14
213658	GATGCAACCTCCTTCGTACTG	59.476	52.381	1.524	CATGCGTTTATGAAGTGTGCG	59.56	47.619	1.440	123	2.965	AC	11
213768	TGCCGCATAAATTGAGTTTCG	58.611	42.857	2.389	GCCAATCAATCTCTCGTCCAC	59.811	52.381	1.189	100	3.577	A	12
213784	GGCTCAACCCGCACTTATTC	60.012	55	0.012	GCTGAACGGATGACTGACTG	59.384	55	0.616	103	0.627	AATG	7
214063	CGAAGTATGGCCACACAACG	60.291	55	0.291	TCGTTCTGAATCGCCCTACC	60.294	55	0.294	102	0.585	A	10
214081	GGAGCACAGGAGATCGGATG	60.719	60	0.719	CTTGGCCTGTCATCGATCTG	59.165	55	0.835	145	1.554	C	11
214453	GGGTCGACTCAGCCTCTAAC	60.294	60	0.294	TCCAGAAGAGTGAGGTTCCC	59.127	55	0.873	143	1.167	C	12
214463	CTGGCCTTGTGATGGCTTTG	60.507	55	0.507	AGCGTCTAATTGTTGTGTGTCC	59.949	45.455	2.051	138	2.558	A	10
214742	TTGTTCAGGATTGCTGCCAC	59.795	50	0.205	GGGCCGGCGAACTTTAGG	61.562	66.667	3.562	125	3.767	AAGG	7
214753	ACGGTAGTGGTGATCAAACATG	59.426	45.455	2.574	TGTACAATGTGGCCTGCAAAG	60.147	47.619	1.147	100	3.721	AG	9
214815	CCATTGGACGGATTTGCATG	58.530	50	1.470	GCCTTCGTGTAATTATCCGTTC	58.294	45.455	3.706	115	5.176	A	10
215091	GACCATCCATGAAGTGAAGGC	59.738	52.381	1.262	GGCTCTCCATCCTTCGGC	60.635	66.667	2.635	117	3.897	C	13
215122	CTCACAGTACCCACAGACCG	60.505	60	0.505	CTACCCTCGCCCTAGTACAC	59.438	60	0.562	106	1.067	C	19
215231	GCGCACACTACCACATTCTC	60.014	55	0.014	ACCTCCCGGCACCCTAAC	61.774	66.667	3.774	124	3.788	A	11
215469	TCGGACAGCGGATTTAGAGAG	60.079	52.381	1.079	TCTACTGGGCCATCTGTTCC	59.567	55	0.433	139	1.512	C	10
215491	GCGGAATTTGCCTCCCTTG	60.232	57.895	1.232	CCCGAAAGCACAACACCG	60.088	61.111	2.088	128	3.320	C	11
215512	AGAAAGAGTGCATCAACGCTG	59.946	47.619	1.054	CTGACTTACCGCATCACCTC	58.815	55	1.185	103	2.240	C	11
215528	ACCTCCATCCAGTGCCAAG	60.080	57.895	1.080	ACTTTCCTCACCTCGATACCC	59.662	52.381	1.338	110	2.419	C	11
215540	TTTCCACCATCTTAACAGCAGC	59.946	45.455	2.054	ATTGATAGCAGTCCCAGTCACC	60.604	50	2.604	100	4.659	C	13
215689	CTGCAGATACATGAAGGTTGGG	59.816	50	2.184	CAGTCCAGGTTTGTTCAATAGC	58.329	45.455	3.671	115	5.856	AC	8
215733	CAAGTGACGCTAAGTGGACC	59.311	55	0.689	ACAAATTGCTTTCACACGCAAC	60.143	40.909	2.143	104	2.832	C	16
215778	ACGGACACTTGCAAGCATTC	60.152	50	0.152	GCCACCAGTTACCGTAATATCC	59.362	50	2.638	121	2.790	C	14
215815	ATGAGGGTGATTTCTACAGGTG	58.280	45.455	3.720	TGTATGACCGGGTACAGCTG	59.937	55	0.063	100	3.783	C	15
215951	TGCCCATATCCGAATAGTCCC	59.868	52.381	1.132	TGTCCGTTGTTGTGTTAGGC	59.446	50	0.554	132	1.687	AATTC	9
216018	GCAGCATACCGTAACACCTC	59.452	55	0.548	GACCACACATCTCGTTCCAG	59.027	55	0.973	101	1.520	C	11
216170	ACATCAACCTCACTACCGCG	60.857	55	0.857	GTACTCCCGACCTTCTAGCC	59.724	60	0.276	145	1.133	C	14
216335	GCTCAGACACTGCTTCCTATG	59.202	52.381	1.798	TGAAGTGTCCGGTCTTGTCG	60.715	55	0.715	112	2.514	A	10
216566	TGTTCGAGTCATTACGTCACG	59.157	47.619	1.843	GTGGGTTTGTTTGGGCGG	60.32	61.111	2.320	110	4.163	AC	10
216575	TGAGCGGTCAACTTCACCC	60.681	57.895	1.681	CAGACTGGATGTGGAGCCC	60.534	63.158	1.534	101	3.216	A	11
216638	TACAGACCGCATGAGATCGC	60.713	55	0.713	ACAATCAGCCTATATCGCGTG	59.071	47.619	1.929	108	2.643	AT	18
216698	CCCTGCCTCCTGTTACTTCC	60.513	60	0.513	TGCTTCGATTCCCTCCAGAC	60.223	55	0.223	108	0.736	C	12
216749	TACTAAACTGCGCACCCAAG	58.946	50	1.054	TCGGTTGAACGGGAAATCAC	59.232	50	0.768	133	1.822	A	11
216817	GGCATTCCTACTTCTTCAACCC	59.749	50	2.251	GTCTAGTGCGCACCCAAAC	59.866	57.895	1.134	100	3.386	C	11
216839	GTACCGCTACCACTGCCAG	60.896	63.158	1.896	GAAGTGGTGGAGCTGCAAG	59.491	57.895	1.509	145	3.405	AGC	8
217071	CCAGTTCAATTGGTACCTGCC	59.942	52.381	1.058	ATGCATGGCTCCACTCATTC	59.071	50	0.929	147	1.987	AC	23
217107	GAGGTCCTGGCCAGCTAG	59.527	66.667	2.473	CGAGTCACTGATAAAGGTCTGC	59.566	50	2.434	135	4.907	A	11
217280	GCGTGTCAGAAGTACTTAGCAG	59.825	50	2.175	TCCCACGTACATTATCGCTG	58.243	50	1.757	141	3.932	A	10
217395	TGAGCGCTGTGTTTAACCTC	59.236	50	0.764	CACCACACTAATGCCCTGC	59.562	57.895	1.438	109	2.202	A	11
217400	TGGACATCTGATTATCCGTGAC	58.440	45.455	3.560	AAGGATCTTGCGAACACGAC	59.311	50	0.689	101	4.249	AC	21
217468	GGAAGAGCACACGTCTGAAC	59.596	55	0.404	CACATCCCAGCCCAGACC	60.482	66.667	2.482	149	2.887	C	10
217598	CGTAACTTAGAGGCCAGTGG	58.452	55	1.548	TGACCTCCAAGCAATGCAAC	59.795	50	0.205	126	1.754	A	10
217870	GGTTTGGTGGGAGCTGCC	61.744	66.667	3.744	TCGTTTGTTGGGTGGTCTTG	59.368	50	0.632	119	4.376	A	11
218352	CAACGACTGTCCTGGCTAAG	59.027	55	0.973	GGCCTGGCATTTGTCTGAAG	60.223	55	0.223	129	1.196	AAAG	10
218373	TCCTTGCATTCTTGATACGTGC	60.078	45.455	2.078	AGGTCACTACGTTGCCTGTC	60.436	55	0.436	118	2.514	C	13
218769	GGCGTGCGTTCTGTCTTAAG	60.291	55	0.291	GCAGTGATTTGGCCGGAC	59.855	61.111	2.145	112	2.436	CG	8
218851	AGAACAGGGTGCTGAGGAAG	60.079	55	0.079	GAGGCCAGAACATAAAGCCC	59.364	55	0.636	103	0.715	C	13
219012	ACTGACGAAATAGCAATCAGGG	59.227	45.455	2.773	TGCTGTCCTTTCGAATACTACC	58.641	45.455	3.359	123	6.132	C	14
219169	AGAAATCTGGGAGCCTCGAC	59.935	55	0.065	TTTCATGCCCGCTGAGAGG	60.833	57.895	1.833	115	1.898	A	12
219337	GTAGATGGAACTTGTGTCGGG	59.133	52.381	1.867	TCCTCTGACCCTCCTCCC	59.669	66.667	2.331	142	4.198	C	10
219370	GTTCATTGAGGAGGAAGTGGTC	59.424	50	2.576	CGTTGCAGCGGGTATCCTG	61.91	63.158	2.910	112	5.487	A	10
219406	GCCCTTACCAATGTGCTACC	59.366	55	0.634	ACAGCATAGAATACACAGGCG	58.927	47.619	2.073	117	2.708	A	10
219667	GTGTGGTGGTGCTAGACATTG	59.945	52.381	1.055	AAATACCGCCACTGCCATG	59.258	52.632	1.742	132	2.797	C	16
219694	TCTGTTTCCGTCCTCATGTG	58.296	50	1.704	TGTCTGTTCTTAAGCCGCAG	58.95	50	1.050	101	2.753	C	12
220253	GAAGAAAGTTGGATGGGCGC	60.574	55	0.574	CCACTCACCTATCGACCCAG	60.009	60	0.009	133	0.583	AATT	6
220379	GTATTTCTCCCGCGATGCAG	59.874	55	0.126	TCATGACACAGACCAAGTAGTG	58.505	45.455	3.495	111	3.620	ACTG	13
221106	AATGTTGGCGTAGTTTCGGG	59.586	50	0.414	ATACTGCACAACTCGCCAGG	61.146	55	1.146	127	1.560	C	10
221135	TCCTGTCTGCATCTTCCACC	60.151	55	0.151	CGTCTGCTGGGATTTGAACC	59.941	55	0.059	134	0.211	A	10
221515	CTAACAGTGAAACGTACGAAGC	58.444	45.455	3.556	CTCTTCCTGCCTCTGTCTGG	60.223	60	0.223	115	3.780	AGC	9
221935	GAAAGGAACAAGCAGGACGG	59.870	55	0.130	TTCTGGACGAGGGATTGGC	60.157	57.895	1.157	120	1.287	A	11
222044	GTGAGCAGTAACAACGGACC	59.593	55	0.407	CTCCATAAACCCGTCACCAC	59.016	55	0.984	100	1.391	C	15
222100	TTTCACCCAAGACCGTGTG	58.660	52.632	2.340	AGGTTTACTCCGTTAGATCCGC	60.662	50	2.662	100	5.002	C	11
222139	GTGGGTGGTGGTGTACGG	60.713	66.667	2.713	CCCACATGCCTCTACCACC	60.536	63.158	1.536	101	4.248	C	10
222246	TCACAGGGTTGCACAATAAGC	59.874	47.619	1.126	TTCTCACAGTACGGTTCTTGG	58.375	47.619	2.625	106	3.751	A	14
222256	TGACCAAATGAAATAGGACGGG	59.153	45.455	2.847	TACGCTCAGTCTCCACCATC	59.652	55	0.348	112	3.195	C	10
222610	AGAATGATGCAACCTCACGG	59.010	50	0.990	TCGTAACAGAGACAAATGGTGG	59.1	45.455	2.900	118	3.890	ACTG	6
222678	GGGTTCCTGTTATGAGATCTGG	58.690	50	3.310	TGACGTAGATAACCGGCCG	60.01	57.895	1.010	100	4.320	C	11
222774	AGCTGAGAAGTGAGAAATTCCG	59.166	45.455	2.834	TTACCAAGGGCGGCATTAAATG	60.338	45.455	2.338	100	5.172	AAT	10
222933	TCTGAGTTCGGAAAGCACC	58.139	52.632	2.861	GCGCTTCATATTTCACTTCGC	59.362	47.619	1.638	105	4.499	A	11
223311	CGCTCCAGGAAGTTAGGTAGG	60.351	57.143	1.351	GCCACAGACTCACTCCCTAG	59.937	60	0.063	124	1.414	AACT	9
223404	GAAGAAGGAACACAGGCAGC	59.870	55	0.130	TCTTGCCTACGATACCACATAC	58.181	45.455	3.819	106	3.949	C	12
223710	GGGTGGAATACGTAGAGGGC	60.366	60	0.366	GTGATCACGTGGCTTGGATG	60.012	55	0.012	141	0.379	A	10
223747	CGCGAGGAATGACATTGAGG	59.804	55	0.196	TGTGCACCCTTGGATGTATG	58.634	50	1.366	138	1.561	AC	8
223803	AACCGCAAGTGGAATGTACC	59.224	50	0.776	GTTTCAACATTTGCGGGAGG	58.677	50	1.323	129	2.100	AC	21
223879	TCAGTCGGTTAGCAGCTGAC	60.505	55	0.505	AAAGAAACCTGTCCCACTGC	59.069	50	0.931	108	1.436	A	10
224427	CTGGTAGTCAAGCACATCCG	59.098	55	0.902	GCTGACCTTTCATTCCAGCG	60.292	55	0.292	130	1.195	A	10
224774	GTCGCACAGCAAGATATGATAC	58.104	45.455	3.896	TCCTCTGTTATCGCGGCTAG	59.798	55	0.202	124	4.098	AC	34
224775	GTCGCACAGCAAGATATGATAC	58.104	45.455	3.896	TCTCTGTTCTCGGGTCTTGTG	60.147	52.381	1.147	123	5.043	AC	33
224859	GTACTTGTGCCTGCTCGTG	59.576	57.895	1.424	ATATGCCAACAGGAGGGAGG	59.635	55	0.365	132	1.789	AGC	9
224863	GTCGGTAGGCATTGACAGTTC	59.745	52.381	1.255	CCTGTGGGTTAACAAACATCCC	60.207	50	2.207	129	3.462	C	15
224882	CGCAAGCTATAACCAATCCAC	58.134	47.619	2.866	TGAACCGATGTGAGAAATGACG	59.757	45.455	2.243	109	5.108	A	10
225039	GCGTAACATCCCAGAACAGC	60.013	55	0.013	AGCTGTCCATGTTTCACTGC	59.511	50	0.489	127	0.502	A	10
225058	GCCACCGTAGTCAACAAATTC	58.544	47.619	2.456	CGCAGGATCCTAGGGTTAGC	60.437	60	0.437	143	2.893	A	10
225063	ATTGGACATCGACAAACACATC	58.069	40.909	3.931	CTGGATATGGAGTTAGCGCG	59.035	55	0.965	101	4.897	AC	14
225096	TGCCCTGTTTGTTGAGGTTG	59.649	50	0.351	GGAGGTCTACTGTCCGTGTAC	60.012	57.143	1.012	112	1.363	AGC	8
225315	GTGGTAAACTTCACGCCCTC	59.590	55	0.410	ACCAACACCACCCAGAACAG	60.876	55	0.876	111	1.286	C	10
225447	CGGAATGCACGTGATGTCC	60.013	57.895	1.013	AAGGTCATTCTCCGTCGCAC	61.138	55	1.138	100	2.151	A	11
225571	CGGCTGAAGGGTAAATCACG	59.733	55	0.267	GGGACTAACGGGTTGAAGCC	61.432	60	1.432	121	1.699	C	10
225591	GGAACGTGTTTGTAAAGCGAC	59.098	47.619	1.902	GGCCTGTGACAAAGAGACTC	58.946	55	1.054	111	2.956	AAT	8
226032	ATTAGTCTCCAGCGCCAAAC	59.013	50	0.987	CCAACGGCCATCAGATACAC	59.446	55	0.554	134	1.541	C	10
226375	GGCACAAATAAAGATGCTTCCG	59.310	45.455	2.690	GTTGCTGCAGTTGACATTCG	59.05	50	0.950	105	3.641	A	10
226520	CGCTACTTGTGCCTGTTCTC	59.665	55	0.335	ACTCAACTACTTCGTTCGCC	58.678	50	1.322	115	1.656	C	15
226647	TCCCTATGAGTTGTAGCGCC	60.008	55	0.008	TACCAGTCTGCCCATGTGAC	60.151	55	0.151	113	0.160	ATC	13
226691	ACCCACATGCATTGAGAACATC	60.010	45.455	2.010	ACACAGCAGGCAGTTATCAC	58.939	50	1.061	101	3.071	ATC	11
226798	GCAATCCTGTGGCCGTATTC	60.082	55	0.082	TCTCCTGCTGTTAGACCACC	59.499	55	0.501	135	0.583	AT	8
226838	GAACATCTCTCAGCGAAGTCAG	59.568	50	2.432	AGTCCTCACACCCGGTAATATG	60.075	50	2.075	140	4.507	A	13
227045	GCTCCGTTTGCAGCACTG	60.469	61.111	2.469	AAGTAGCCCGCAGTGCTG	60.79	61.111	2.790	127	5.260	AC	21
227218	CCCAGGATATGACACCCAAC	58.414	55	1.586	CCAACAGAATTTACCGGGCG	60.293	55	0.293	138	1.878	C	11
227225	GTTGGCCCATGTCGTTTAGG	59.940	55	0.060	TCGTTTCGCACTGTAACTCAC	59.617	47.619	1.383	124	1.443	C	11
227487	CGGCGTGATTTAGGAACAGG	59.733	55	0.267	ACAGGATGTACAAGATGACGC	58.859	47.619	2.141	141	2.408	AC	25
227695	TGTACGGTCTTGTGTGGTTG	58.805	50	1.195	GCGTCCAAATATCTCACGGC	60.153	55	0.153	104	1.347	AC	13
228472	ACGAATGAATACTGCTGTGAGG	59.233	45.455	2.767	CGTTCAACCCGTAGCTTAGTC	59.483	52.381	1.517	100	4.285	ATC	12
228497	AGGGCCTCACGTGTGTATAC	59.937	55	0.063	CCTGCTACGTGGTGGTTCC	61.122	63.158	2.122	130	2.186	C	14
228923	TGATCGTGAAGCCAGGGTAC	60.223	55	0.223	TCCCTTCCTTTACGCACCTAC	60.215	52.381	1.215	122	1.438	C	13
229087	AGGGCAATACGGGTTCAGAC	60.512	55	0.512	GCTGCTCACGGAACATTACC	60.013	55	0.013	130	0.524	C	13
229113	GCAGGATTAATTCGTTTCGCAG	59.384	45.455	2.616	GGTGTGCCGTTGTGTGATC	60.158	57.895	1.158	103	3.774	A	10
229151	TGGCGTATGTTTCAATTTCCAC	58.587	40.909	3.413	AAACCGCCCGAAACTGGAC	61.645	57.895	2.645	100	6.057	A	10
229211	AGAAGCGAAACCTGTCCCAG	60.725	55	0.725	ACTACTGGATGTCGCGCC	60.242	61.111	2.242	108	2.967	C	11
229237	TGCCAAGTATAGCCAACAGTAG	58.629	45.455	3.371	AGGCCTGGTATGTGACTGC	60.157	57.895	1.157	104	4.528	A	12
229318	CTTGGCAGATTCGGACGTAG	59.176	55	0.824	TTCCGGCCCATTGTATTGAC	59.001	50	0.999	106	1.823	C	13
229370	AGGTTTCCAAGGTTGAAGCG	59.437	50	0.563	TTCGAGGCTTGTTAGTAACCC	58.435	47.619	2.565	128	3.128	AC	11
229509	GGGTATAAGAAACGGTGTGGG	59.123	52.381	1.877	CCTCTTTACACAGCGGACATC	59.476	52.381	1.524	135	3.402	C	12
229536	GTCAACAAGTGGCCCAACTG	60.364	55	0.364	GTTGCACGTACGTACTCAGC	60.017	55	0.017	113	0.381	ATC	9
229576	GGCAGTGTTCACCTGTGTTC	60.082	55	0.082	GGTCCACAACGAAGAAACCC	59.799	55	0.201	119	0.283	ACAT	6
229582	AGTCGCTTATCCCACCTGAC	59.936	55	0.064	AGGATGTAGTCACGAGCCAC	59.938	55	0.062	112	0.126	C	10
229619	GCTCGTAATGTGATACAGGACC	59.370	50	2.630	TTCGATGAGGCAGAAAGTACC	58.51	47.619	2.490	116	5.120	AC	16
229759	ACCAGAATCGTACCAACTGATC	58.637	45.455	3.363	GAGATAGCATGCTGAAGTCGG	59.343	52.381	1.657	118	5.020	AC	9
229926	TCGGTGTTTGGTAATTGTGGG	59.530	47.619	1.470	CCAACCCACAACTCTCCTTC	58.86	55	1.140	116	2.610	C	10
230202	ACCACACACAGGCTGTAGAG	60.080	55	0.080	CACTTATCACACTACCACCGG	58.862	52.381	2.138	116	2.217	C	16
230246	CTGGCTTCTCAACGTCCATC	59.379	55	0.621	GAATCGTGGTTAGTGGTGCG	60.014	55	0.014	105	0.635	A	10
230250	CTGCGCGTGTGTACATATAAAC	58.887	45.455	3.113	GGTGGTCTACGTTAGGTCCG	60.293	60	0.293	144	3.406	AC	20
230469	GGGTCGAGCAACTGAGGG	60.478	66.667	2.478	ACCCGCCCTGTATTTCCG	60.164	61.111	2.164	125	4.641	C	11
230563	TCCTGTGTTCTGAATCCCTCG	60.215	52.381	1.215	TCCGGTACAGAGTTACAGACAG	59.684	50	2.316	107	3.531	C	11
230625	TCTTACAGAGGAGTGGGATGAC	59.410	50	2.590	TCTCATGTCAGCAGAACACAC	58.994	47.619	2.006	100	4.596	AC	8
230793	ACATTCCAGCACTTACGTAGAG	58.646	45.455	3.354	GAAGCTTCAGTACCTGCGTG	59.665	55	0.335	105	3.688	A	10
230861	TGTACCGACTGCACAGCC	60.398	61.111	2.398	GCCTACCCTGCAGAAACACC	61.719	60	1.719	104	4.117	C	12
230870	AAACTCCCGTGCGTTCTC	58.377	55.556	3.623	ACTTACTAGCGCTCATTGATGC	59.627	45.455	2.373	125	5.997	A	11
230904	CGACATCATCAGTCGTCTCC	58.621	55	1.379	ACACCACTGTCCAAGAATTCC	58.903	47.619	2.097	130	3.475	A	14
230909	CGTATTGTCCCGCACTGATG	59.805	55	0.195	TGCAGATGGTGGTGTGGG	60.324	61.111	2.324	131	2.519	ACTC	11
231033	CTTTCCTCTTGTTGTGGCGG	60.152	55	0.152	TGTGACGGAATGGTGAGACG	60.786	55	0.786	126	0.938	AC	8
231219	TGCTGTCTCGATCTGGTCAC	60.223	55	0.223	ATGGCGCTGTCATTAACTCC	59.084	50	0.916	107	1.139	A	10
231261	ACCCACCCTCCTGTACAATG	59.784	55	0.216	TTGTTTAACCTCGGCGCTTG	60.152	50	0.152	105	0.368	C	11
231408	TCCTTCAGCGTTTCATCACAC	59.608	47.619	1.392	GGCTCCGACAGTGTTCAATG	59.942	55	0.058	116	1.450	AT	9
231499	TTCGTCCCGTTCTTAGGCC	60.158	57.895	1.158	AGGTCCATTGCACGTTCAAC	59.798	50	0.202	101	1.360	A	10
231555	GACCCAGGATGATCTTGCTTC	59.190	52.381	1.810	ACAGCCTACAAGACTCAACTC	58.09	47.619	2.910	121	4.720	AC	34
231713	GCTGAGCCTAGCACGGAC	60.936	66.667	2.936	TGGCATCCATACGTACCACC	60.295	55	0.295	100	3.231	A	10
231745	GTACCAGAACACATGGTAAACG	58.089	45.455	3.911	TGGGAAGCCATGGACAGTTC	60.732	55	0.732	110	4.642	A	11
232018	AAGACGCGAAACTTCCAGG	58.826	52.632	2.174	TAGAGAACGTGTCCTGAGCG	59.941	55	0.059	144	2.233	A	10
232040	AACAGACTACGGAATGCACG	59.030	50	0.970	TGTCTCCGTACAAAGTGGTTAG	58.512	45.455	3.488	138	4.457	AATG	10
232233	GCACCTTAGCTGCATGTATTTG	59.050	45.455	2.950	TGACACACTTATGGATCCACTG	58.561	45.455	3.439	147	6.389	AC	24
232271	ATCACGCTACACAACGATGC	59.736	50	0.264	AAATTTCCCAATGGCCAGCG	60.51	50	0.510	125	0.774	C	18
232375	GTCGACCCAGCCTCTAACAG	60.576	60	0.576	CACAGGTTATTTCCCAGGCG	59.655	55	0.345	118	0.921	C	15
232646	GGTTCTCGAGACGTTGAAAGG	59.682	52.381	1.318	AAGACCTCTCGACCTGACGG	61.72	60	1.720	115	3.038	ACGG	9
232852	ACTACTCTCCTCAAGCGCTG	59.939	55	0.061	AATCGTTATGTCAGCCTGCG	59.451	50	0.549	136	0.610	A	11
233055	GGGAGCCAAGTTGTTCCATG	59.866	55	0.134	TTGTCTGTCTGTAGGCCTGC	60.438	55	0.438	139	0.573	AGGC	12
233305	CAACCGCACGCCATATCTG	60.086	57.895	1.086	CGCGGTAGTAGTGGAAGAAC	58.829	55	1.171	122	2.256	C	18
233324	CATATTCAGCAGCCGATGGG	59.586	55	0.414	GTGTAGGTTGTGGGTTGCTC	59.514	55	0.486	134	0.900	ACAT	6
233338	CCTGTCATACACGGTCCCTC	60.294	60	0.294	GGGTACACGATATCAAGCACAC	59.886	50	2.114	105	2.408	C	13
233492	ACTTGCTAACACAGTGGAAGC	59.535	47.619	1.465	GGAAATGTACCACTCCGTCC	58.73	55	1.270	123	2.735	A	13
233604	CCTCTTCACTGGATTGGCAC	59.296	55	0.704	ACTCTGTGCGTTGTTCTGTC	59.17	50	0.830	134	1.534	C	13
233894	GGTGTCAGCAGGTACATCAC	59.020	55	0.980	AGCTGAGAAGTGAGAAATTCGG	59.166	45.455	2.834	120	3.814	AAT	16
233900	CGAGTTCTGGCGGAGTTTG	59.576	57.895	1.424	CCTATAGAAAGCGCAGGAACG	59.614	52.381	1.386	101	2.810	C	17
233924	TCTAAGGCTCTGTTTCTGAAGG	58.225	45.455	3.775	AGGTTCCCTATCGTCTTCCAAG	60.009	50	2.009	101	5.783	A	14
234250	CTGCCATTAACACGGTGCTC	60.292	55	0.292	ACCGTAGTGTGAAAGACGTTTG	59.887	45.455	2.113	145	2.405	A	11
234513	CCATGTAAGGTGTGCGTGC	60.231	57.895	1.231	AGATCCCTCCTTATGCGTCTG	59.801	52.381	1.199	113	2.430	AC	8
234544	TCTCTTTCCAACAGGTCTCCC	59.797	52.381	1.203	AATACCCTCCGATTCCCTGG	59.342	55	0.658	105	1.861	C	14
234690	GAGAAATAAAGGTCAGTGCGC	58.348	47.619	2.652	CCAGCAATGACCGGAACTC	59.27	57.895	1.730	133	4.382	C	15
234715	GCGGGAAATTAAAGTGGCTAGG	60.401	50	2.401	CCAGCTAAGACATCCTCTCAG	58.026	52.381	2.974	103	5.375	A	10
234862	GGAAGGTACAGAAGTCACAGG	58.438	52.381	2.562	ATATCCAAACACCCAGCACC	58.623	50	1.377	108	3.939	AC	10
235061	GCAGACCTATACTTTGCGGC	59.803	55	0.197	AGGAGGTCTAAAGCCTTTAAGC	58.549	45.455	3.451	113	3.648	A	13
235158	TGAACAACACAATACCCGTACG	59.693	45.455	2.307	TTCGCATTGTTGGCTCATGG	60.223	50	0.223	128	2.530	A	10
235283	TTTCGGAAAGATGGTGCCG	59.193	52.632	1.807	AGCTGAGAAGTGAGAAATTCGG	59.166	45.455	2.834	130	4.642	AAT	8
235505	TACGGAACTGGAGTCGACTG	59.586	55	0.414	TGGTGATTGGTTGCTGACTC	58.861	50	1.139	146	1.554	A	11
235544	GATGGCTCAGTCGGTAAAGC	59.451	55	0.549	ACAGGAGGCTGGGTGGAC	61.701	66.667	3.701	124	4.251	C	10
235581	GCAAACACCGTAACCAATGTC	59.083	47.619	1.917	CGAATTCCCGCTGACCAATC	60.083	55	0.083	103	2.000	AC	18
235934	CTCAAGAAGGTGTACTCCATGG	58.897	50	3.103	AACCTCGGCGCTACATGG	60.555	61.111	2.555	110	5.658	AACT	9
236003	CGCAGGCAAACACACAGG	60.394	61.111	2.394	AATCAGGGAGGGCTGGATAG	59.041	55	0.959	107	3.353	C	13
236019	AGGTTGTCATCCATACGCAC	58.727	50	1.273	GCCCGTTGTTTCTCCTTATGG	60.011	52.381	1.011	102	2.284	C	10
236106	TTGTGAGGAGGTTCGGTGTG	60.652	55	0.652	AGGTACTTGTGCTGTTTCCTG	58.911	47.619	2.089	101	2.741	C	11
236120	CTGTTACCCGCAGTTTAGCTC	59.745	52.381	1.255	TTACACATTTCAAGAGCCGTTG	58.27	40.909	3.730	102	4.985	A	11
236308	TGAAGGACTCTGCTCCATGG	59.861	55	0.139	CAACTTCCGCCATCCAACTC	59.941	55	0.059	118	0.198	AACT	9
236365	TCCTTCATTGTTCCGTCAAGTC	59.361	45.455	2.639	CAGAATTTGACTCCGTACCCG	59.477	52.381	1.523	111	4.162	A	10
236425	TGTACCGAGGCTGTGAAAGG	60.438	55	0.438	CTTGTTAATCGGCCTGCGG	60.012	57.895	1.012	120	1.450	C	14
236502	GTTGGGTTAGGTTGGGTTAGC	59.598	52.381	1.402	CGACGTGATGTAAACCTAACCC	59.823	50	2.177	100	3.579	AACCT	8
236526	CAACTCTCGTTCCAGGCTTG	59.591	55	0.409	ACTGAAATTTGAGCTGCCTGAC	60.207	45.455	2.207	101	2.616	A	11
236637	TTTCCGCTACGTTTCTCAGC	59.313	50	0.687	TCCTCTGATCACTGCGTCAC	60.223	55	0.223	138	0.909	AAT	11
236666	GCAACGTTAAATGTTACCGCC	59.489	47.619	1.511	TGGCACCACAGACTCCTTAC	60.079	55	0.079	103	1.590	C	12
236756	AGCACTTGAATAGCAGATGGTC	59.225	45.455	2.775	GCACAGTTGATTGCCCGTG	60.814	57.895	1.814	139	4.589	C	14
236879	CGCGAGACATTCCCAATCTTG	60.413	52.381	1.413	GATCTCGCCAAACAGCCTG	59.643	57.895	1.357	134	2.770	C	13
237460	ACATACAACGTTTCAGAAGCTG	58.017	40.909	3.983	CACCCACCCTAATCCCAGTC	60.224	60	0.224	121	4.207	A	10
237563	CGTCCCTGCCTTCAAAGATG	59.658	55	0.342	ACCTTGCTGCCAGTGACTG	60.984	57.895	1.984	116	2.327	A	10
237660	GGTAGAGGCCAAGGAATAGC	58.206	55	1.794	TCTCCTGTCATTTGGTTGGC	58.852	50	1.148	115	2.942	A	10
237663	CTCTGGGCATTCATGGTCTG	59.079	55	0.921	AGGCGGAAATACTGTACCTAAC	58.368	45.455	3.632	127	4.554	AAC	10
237713	CGTCGTGAACAGTGGTCTTC	59.601	55	0.399	GGTAACCGTATCGCTGAGTG	58.899	55	1.101	101	1.501	A	12
237838	GGAGGGTTCGGCTATGATG	58.133	57.895	2.867	GTGCTGTGGGATATTAAGCGG	59.877	52.381	1.123	114	3.989	AAT	14
238107	CTGAAACCTTGACACCCACC	59.437	55	0.563	CACCCACACTCAGTTGAAGC	59.799	55	0.201	101	0.764	C	10
238175	CTTCTGGGATATTACGCGGC	59.311	55	0.689	CTTCGCGACTCTTTGCTCAC	60.29	55	0.290	119	0.979	C	78
238603	GTTATTCTGGGCTGGTTCGC	60.012	55	0.012	GGATTACAACTTGACGCCGC	60.636	55	0.636	131	0.648	A	10
238953	GGCCACGATCAAGACACTAC	59.100	55	0.900	GGCATGCCCTTTGGTAAATG	58.438	50	1.562	119	2.462	C	23
238989	TCTTTCGCGGAATCAACAGC	59.943	50	0.057	AGGCTCGGTGGTCTTATGTG	60.223	55	0.223	136	0.280	AAT	14
239013	TCATACAGTAGCATCCTCAGCC	60.141	50	2.141	GCTCCTTAAGATAACAGGCCC	58.91	52.381	2.090	129	4.231	A	12
239272	TGTTTATAACGTGGCCAGCG	59.661	50	0.339	AGGCGGGCTATTCTAACCG	60.007	57.895	1.007	100	1.346	A	10
239312	AAACGCTGGTAGTGGTAGC	58.217	52.632	2.783	CGAGGCAGGGTTATTGGTTG	59.655	55	0.345	134	3.127	C	10
239354	CCACGACACGATGGCATTG	60.303	57.895	1.303	CTTCCTCCTATGACATTACGGC	59.103	50	2.897	100	4.200	C	12
239433	ATCTCAAGAAGGGCTCCGC	60.233	57.895	1.233	TTTAAGCCACAACCAACCAAC	58.23	42.857	2.770	116	4.003	ACCG	10
239487	AGGTAAACTCGTCTTTGTGCAG	59.625	45.455	2.375	TGTTTGCCTCTCATGAACCAC	59.531	47.619	1.469	106	3.844	AGC	10
239606	TCCCGGGAGACAGAAATGTG	60.151	55	0.151	GAAATGGTTCCAGTTGCCCG	60.505	55	0.505	141	0.657	A	14
239684	AGGACCAGCTTCATCTCGAG	59.649	55	0.351	TCCAAATACCGTCAGAAGCG	58.74	50	1.260	140	1.611	ACG	9
239728	TGACCATGGAAGTAGACTGACG	60.272	50	2.272	ACAACTGACAACCCAAGTGC	59.652	50	0.348	135	2.620	AAT	11
239742	AACACCCACATCTAAGTCTCG	58.163	47.619	2.837	GACTTCATGGCCCGTTGTTC	60.223	55	0.223	124	3.059	A	10
239833	ACGTTTGTGTACTGCCAATTC	58.127	42.857	2.873	TTCGGTCAAGGGCTCTACAG	59.864	55	0.136	100	3.009	A	13
239855	GTGTATTGAAGGTGCACGC	58.049	52.632	2.951	ATCTTGGCGCGTACACAATC	59.733	50	0.267	111	3.218	AC	23
239954	TCTTAGCCTTTGACAGCGTC	58.666	50	1.334	ATGGCCAACGTCCTGACAC	61.055	57.895	2.055	104	3.389	C	12
240177	CCCGACCACTTTATCCTCGG	60.649	60	0.649	ATCCAGAAACGTGAAGACCG	58.666	50	1.334	100	1.983	C	14
240383	AAATCCTTCCAGTGGGCGTC	61.087	55	1.087	AGCTTCGTCATGTCTTTCGG	59.027	50	0.973	109	2.059	ACGG	12
240631	ACCGAGGCTAAGAATGAGTGG	60.284	52.381	1.284	TCTAGGGTGAACTTAGGTGGG	58.951	52.381	2.049	140	3.332	A	13
240828	CAACACCATTGCCGCCAC	60.780	61.111	2.780	TTTGTTTGTGCCGGTCGTG	60.304	52.632	1.304	109	4.084	C	29
240869	TTAGCTGAAGTGGCCTCCG	60.157	57.895	1.157	GAAGGCCTCTGTTCCATGTAG	58.848	52.381	2.152	132	3.310	AACT	8
240953	CTGTGGAGAACTGGCTTTGG	59.511	55	0.489	CGTTCGTTCGTACATCCATCC	59.884	52.381	1.116	143	1.605	AATG	15
241001	CAAACTGACTAGCTAACACACG	58.109	45.455	3.891	AGCCACATGTACAAGCTTTCTG	59.946	45.455	2.054	105	5.945	A	11
241006	GCTCCAATGCAATGCCTATATC	58.389	45.455	3.611	TGGACGAGTGGAGTTACAGC	60.152	55	0.152	124	3.763	C	10
241170	GGTGAAAGCCTGGGAGTATTC	59.118	52.381	1.882	CCCGCGGTAAAGACACAAAC	60.5	55	0.500	100	2.382	C	11
241187	ACTGGGTGTGTACTCCTTCC	59.422	55	0.578	CCAGCCATGTACCCACCG	60.872	66.667	2.872	126	3.450	C	11
241355	AGAACTGACGCTAGATGGGAG	59.735	52.381	1.265	TCGGTACCATCTTCAAGGGTC	59.939	52.381	1.061	100	2.326	A	10
241639	TCGTTAACTTTCAAGGGCGTC	59.610	47.619	1.390	TCAACCGCAGCTTTACACAG	59.519	50	0.481	105	1.871	A	10
241651	TACTGGGCTATTGGTGCGTC	60.580	55	0.580	AAGTTTGTGTGTTGCCAGGG	59.936	50	0.064	135	0.644	AC	15
241717	TGTGGCTGTATTCTGTAGTTCC	58.564	45.455	3.436	AGCTGCGACACTGTATACCC	60.294	55	0.294	136	3.731	ATC	13
242053	ACGTCTCGGTAAACATTCCC	58.374	50	1.626	GCGGTGCGTTTAATTATTCCG	59.361	47.619	1.639	103	3.265	C	18
242103	TATGAAATCCTGTGCACGCG	59.733	50	0.267	ACAGAAGCAGGCATCATTCAC	59.669	47.619	1.331	105	1.598	C	11
242427	TAAGCCTTCGAGCTTCACTG	58.378	50	1.622	CACTTTCCAGGGCGATTCTG	59.658	55	0.342	125	1.965	AC	26
242595	CCCAAGTCCTACAACCAAGTG	59.257	52.381	1.743	CCCTTGTTTGATTGTTCCTTCC	58.505	45.455	3.495	109	5.238	AAGG	8
242699	GCTACTAATGGCGCTCCTC	58.534	57.895	2.466	TTGCCGAGATTTGAAACCCG	59.869	50	0.131	125	2.596	AAAC	6
242872	TGTTATTGCACAGTGGCAGC	60.152	50	0.152	GCAAGCGTGTCATTTGCATG	60.016	50	0.016	124	0.168	A	10
243152	GGGTCTGCTAGTTGATGGTC	58.436	55	1.564	ACATGTTGGTGGCGAGTAATG	59.672	47.619	1.328	141	2.892	C	13
243165	AGAGGTTTCACTGGTACGTAAC	58.511	45.455	3.489	CGTACCAGCCAGCATTTCG	60.013	57.895	1.013	134	4.502	C	16
243304	GCCATATGTCGCAGGTATCC	59.020	55	0.980	AAGGGCCATTGGTGTTTACG	59.506	50	0.494	111	1.474	C	23
243336	CCACCCAGCTTCCACTTCAG	61.368	60	1.368	CTACAGGGAGGTGAGTGGTC	59.575	60	0.425	102	1.793	C	11
243531	TGAATCGCAAATCAACTGGC	58.107	45	1.893	GTACAGCACACCCAGACTTTC	59.607	52.381	1.393	135	3.285	A	10
243649	ACCCACCGGCTATAACAGTG	60.224	55	0.224	AGTTCGGCTTTCCTTGACAC	59.157	50	0.843	130	1.067	C	12
243793	GAACATGGCGCCAGATCATC	60.152	55	0.152	CACGAAATTGGCAAGAACAGG	59.078	47.619	1.922	147	2.074	A	11
243814	TCCGCGACTAAATTAAGCCC	58.804	50	1.196	GTTCAGTAAGGACGTGTGGG	58.953	55	1.047	100	2.243	AT	8
243843	CCACCCAGCTTCCACTTCAG	61.368	60	1.368	TCTCAACGCCGGCTCTAAAG	60.857	55	0.857	116	2.225	C	11
243983	CGGTCAAAGCCATGCACTG	60.524	57.895	1.524	CCGGCAGGGTCAAGAAATAG	59.084	55	0.916	127	2.440	A	11
244354	TCGCGGAAGTATTACTGCAG	58.537	50	1.463	AATTGCACACGTAGCGACTG	59.944	50	0.056	134	1.519	AAACC	10
244498	AATGCAACAAACACACGCCG	61.606	50	1.606	TACACTAGCCCGCTTCCTAC	59.362	55	0.638	111	2.244	AGC	8
244551	TATGTAGCTGCGGATCCAGG	59.792	55	0.208	CTGACTGCCGCGGATGAC	61.614	66.667	3.614	127	3.822	C	11
244599	CCGACCGAACTCTGTTAAGC	59.388	55	0.612	ATTAGCGCCAGACTCAGGG	59.931	57.895	1.069	104	1.681	A	10
244637	TGGAAATTGAAGGAGGACTCAC	58.751	45.455	3.249	CACGACCTAGTCTGTCTTTCG	58.885	52.381	2.115	104	5.364	AG	8
244837	GTACTGGTGTAAGGCTGCTG	59.020	55	0.980	TGTGTGAGGACGGGTATGC	60.158	57.895	1.158	111	2.137	AAT	10
245410	ACTCTGCATGAAGGTGATACG	58.583	47.619	2.417	GCAGTGCCTCAACCAACTG	60.084	57.895	1.084	100	3.501	AAT	11
245416	GTGGTGCCGCAATTATCGTG	60.981	55	0.981	GGTTCTCCGGGCACAAATG	59.861	57.895	1.139	120	2.120	AC	17
245532	GAATCCTCACGCATACCACTG	59.543	52.381	1.457	CGGTCGGTCGGTTTAGTTAG	58.833	55	1.167	107	2.625	ACCG	6
245539	AACAATCCTTACAGTCAGGCG	59.057	47.619	1.943	CAGTTGCCTCAGACTTCGG	58.904	57.895	2.096	100	4.039	A	12
245981	GTGGCGGATTAATAGCAATGC	58.809	47.619	2.191	CGCAAATTCCTAGCGGTTG	58.122	52.632	2.878	128	5.069	C	12
246133	AGTGCTGCTGATAAATCGTCG	59.546	47.619	1.454	AAGGTCATGGCTCTCACAGG	60.151	55	0.151	106	1.605	AAGT	8
246260	GACGGACGCGTAGATGAATAG	59.160	52.381	1.840	GCTCACCGCCATCTAATACC	58.95	55	1.050	132	2.890	C	12
246335	TGCCTTAAACTTTCCGCTGC	60.152	50	0.152	AGAATGCACGGTGAGAACAAAG	60.207	45.455	2.207	100	2.359	A	10
246355	TCACAGGGTTGCACAATAAGC	59.874	47.619	1.126	CTTCCGGGTAGACAAGAACAC	59.066	52.381	1.934	115	3.060	A	13
246697	ATATCATTACGCACTGCAACAC	58.212	40.909	3.788	CATTCAGGCGGCTTAAAGTTTG	59.503	45.455	2.497	147	6.285	AC	14
246935	AATCAAGGAGGGTGGATGGG	59.854	55	0.146	CCATGTGGTCTCTTTGTTTCAC	58.525	45.455	3.475	106	3.621	C	11
246967	ACTGTCCTGCCACTCACATG	60.726	55	0.726	AGGTTTCTCGTCTTTCACCTG	58.645	47.619	2.355	128	3.081	C	10
247431	GTCAAATCGGCCCAATCGG	60.011	57.895	1.011	GAGACTGAGTATGCGCGTTATC	59.764	50	2.236	107	3.247	ACG	8
247653	TTTGCCCGAAACGTGGTATC	59.588	50	0.412	TCCTAGGTCTTCATGGCGTG	59.936	55	0.064	118	0.476	C	10
247770	TTTGCCCGAAACGTGGTATC	59.588	50	0.412	TGTACCTCCACTTCCTCCTATG	59.137	50	2.863	133	3.275	C	10
247847	TGTTACAACTTTCCTGGCGC	59.799	50	0.201	TTGCCGTGGTCATCTTCGAG	61.138	55	1.138	127	1.339	A	10
247915	TGCTTAGGTTACTAGACGGCC	60.010	52.381	1.010	CCTTGAGCCTTCCTTCATGC	59.653	55	0.347	136	1.357	A	13
248105	GCATGGCCTGTATTGCTCTC	59.798	55	0.202	TTGCTTTCACCCTTAACCGC	59.796	50	0.204	113	0.405	C	18
248276	CTTTGTAGTCTGTGCTTTGAGG	58.012	45.455	3.988	AATCTCATTTCTTGTTGGCTGC	58.576	40.909	3.424	100	7.412	A	12
248510	AGTAGTCAGTCCCAGCCAAC	59.789	55	0.211	TCCCAATCACACACCATCCC	60.443	55	0.443	136	0.654	C	11
248639	TCTTTCTTAACGCAATACACGC	58.425	40.909	3.575	TTCCTTCTATCGGACAGCGC	60.646	55	0.646	134	4.221	A	12
248650	TCATCTCACACAACATACCTGC	59.163	45.455	2.837	CGCGCGTTTGTTGTTTGG	59.794	55.556	2.206	135	5.044	AC	30
248925	TGCGGCCCATTTAATAACCTTG	60.338	45.455	2.338	ATAAACGGCATGGTAAAGAAGC	58.125	40.909	3.875	120	6.213	ACAT	6
248952	GGGTATCCTACTTCTTCCACG	58.027	52.381	2.973	ACGGAACAGCTAGGATCAGC	60.295	55	0.295	138	3.267	ACTG	6
248978	CGCAAGCAGAGATGAAATTCG	59.029	47.619	1.971	AGGCTAAACACGTCATAATGCG	60.143	45.455	2.143	122	4.113	A	10
249160	AGGTGTTGCAAATTCGTCCG	60.152	50	0.152	ACGCAATGCTTCAGTTCGG	59.865	52.632	1.135	104	1.287	AAAC	8
249563	AGAAATCTGGGAGCCTCGAC	59.935	55	0.065	ACTGTACCGATTGCATACCC	58.141	50	1.859	111	1.923	A	15
249811	TGTGAGTGTGGTCAAGTGC	58.666	52.632	2.334	ATGAAACGCGTTGGTCTCTG	59.592	50	0.408	120	2.742	A	10
250050	ATGCATGAACCAATCCTGTCTG	59.747	45.455	2.253	CCCACTTTACAGTCACATGCC	59.943	52.381	1.057	100	3.310	A	12
250109	GCCAAAGAAAGATGCATTCCC	58.857	47.619	2.143	TGCGGTGCGATTCTGATTAC	59.453	50	0.547	148	2.690	AC	16
250206	GGTGTACAGAGCTGATCGTTC	59.212	52.381	1.788	GCAGACGGAAGAGTATCACAC	59.212	52.381	1.788	101	3.576	AAAT	6
250287	ACAAGACCTATGCAGCCACG	61.146	55	1.146	TGTTGAGCAGCTGAAAGTTGAG	60.142	45.455	2.142	134	3.288	C	12
250675	TGGAACCACAGGCCTACAG	59.699	57.895	1.301	CGATTCGACCTCTCTGTAAAGC	59.634	50	2.366	137	3.667	C	11
250954	GTCAGTTTGATTCCTCCGGG	59.013	55	0.987	AGAAGCTACGGACGCACC	60.164	61.111	2.164	114	3.152	A	11
250976	TCAGCCGATATCAGCCACTG	60.366	55	0.366	TCACAGTGCCCTATCCTCTTG	59.938	52.381	1.062	104	1.428	A	11
251022	CGGCTCTACTCTCATTCACC	58.244	55	1.756	ACCAAGGAATTGTGCATTAACC	58.231	40.909	3.769	110	5.525	A	10
251057	TGTTTCCACATATCCACCACC	58.690	47.619	2.310	TTTGTTTGTGCGGCCCTG	59.93	55.556	2.070	117	4.381	C	12
251102	CCGTTGCGTTGCCACTTG	61.072	61.111	3.072	GCACAATCTTCCACAGCCAG	60.223	55	0.223	117	3.295	A	10
251566	AGGGAAGTTGATGCGTAGTG	58.366	50	1.634	GGGAGGAAGGTGAGAGGATC	59.35	60	0.650	126	2.284	AG	8
251579	CTTGCAGCGGGTCGAGTC	61.537	66.667	3.537	CGCCGTGAATCTAATTTGTCAG	58.811	45.455	3.189	145	6.726	ACAG	13
251778	CGCACTCCTTGTTGCACTTG	61.052	55	1.052	CAGCTGATGTAACGCTTCCC	59.732	55	0.268	140	1.320	AC	12
251908	CACTAACCACACGTGCTGTC	59.875	55	0.125	TGTCGTGATGTGTTGGGAAC	59.16	50	0.840	115	0.965	A	11
252191	AAGACCTAGCGCGGAGAG	59.224	61.111	2.776	ACTTTGGCATCTGACTGTGTAG	59.095	45.455	2.905	102	5.681	ACAG	9
252468	GTCCTGCAGTGACACAAGAC	59.521	55	0.479	GTGAGCAACAGATGACGTCC	59.665	55	0.335	137	0.814	AC	8
252486	CTAGAGGGCCCGCAATAGAG	60.152	60	0.152	CTTTGTGTTGCGGCAGGTAC	60.778	55	0.778	100	0.930	A	10
252736	CCTGGTTTCAAATCGTAGGGC	60.011	52.381	1.011	TGCAGACAACAGTTCCATGG	59.149	50	0.851	100	1.863	A	14
252746	TAATGACGAGGCCTTGGCC	60.535	57.895	1.535	TACATGAACAGAGGCCGGTC	60.223	55	0.223	139	1.758	C	12
252758	CACCGGCTCTTCTAACTGAG	58.458	55	1.542	GATTTGGAAGGAAGGAGCCG	59.369	55	0.631	110	2.173	A	16
253119	AGAAATCTGGGTGCCTCGAC	60.510	55	0.510	CTCCTGATGCACCTGTTCC	58.583	57.895	2.417	118	2.927	A	11
253496	CTGCTGCTGTTCACGGTTTC	60.776	55	0.776	CCTCACACCTTCACCCACC	60.686	63.158	1.686	103	2.462	C	12
253621	CGATACAGTGGAATGCTCGC	59.876	55	0.124	GTCAGTCTGGTGCGGTTTAC	59.593	55	0.407	126	0.530	AC	11
253694	CAAGAGGAGAAATACCGGCAC	59.471	52.381	1.529	AGGCGGACACTTTGTAGAGG	60.152	55	0.152	104	1.680	AC	10
254301	ACTGCCTTCACACTAAACTCG	58.996	47.619	2.004	ATTATGGCCTGCAGACCAAG	58.702	50	1.298	127	3.302	C	14
254491	ACGACAATAAGAAGCACGCC	59.663	50	0.337	CCCGAAGAGCTTTACGTGTC	59.388	55	0.612	126	0.949	A	14
254572	AACTTACGTGCTGCTTGTCG	59.875	50	0.125	GATGACACTTGGTTTCCGGAC	59.945	52.381	1.055	126	1.180	ACGG	6
254862	GTTGGTTGGTTTGGCTGGC	60.975	57.895	1.975	GCTGCTTTGCGTACATGTTTC	59.753	47.619	1.247	104	3.221	AC	14
254981	GCCAGTGGTTGAGACATTGG	59.868	55	0.132	AATCGTGTGCCATCATCAGC	59.728	50	0.272	117	0.404	AAT	10
255346	GAGAGTACAGAACGATGGTGC	59.212	52.381	1.788	GTTGGCCTTCTTATACCAGTGG	59.486	50	2.514	131	4.302	C	20
255456	AGGAAACGAGAGGCTTCAGG	60.152	55	0.152	GACTTGCTCCTTCACTCAGTC	59.067	52.381	1.933	104	2.084	ACTG	9
255495	TTACCACTCCAGTTACACACAG	58.434	45.455	3.566	AGAAGTGTCACCATCAATGTGC	59.946	45.455	2.054	105	5.620	AC	9
255557	AGAAAGTGGATAAGATGCCGG	58.564	47.619	2.436	GTCGTGCCTTACTCCCTTCC	60.862	60	0.862	107	3.298	C	22
255754	CTTCCTACTCCGACTCCACAG	60.011	57.143	1.011	CCCACGATGTTTCCTTCCATTG	60.596	50	2.596	103	3.607	AC	14
255944	CCCGATCTCAGCTCAGCAG	60.675	63.158	1.675	ACGTTCCAGACTGCAGTGAG	60.718	55	0.718	122	2.394	A	11
256044	GAGCAAGTACAGAACACGGC	59.944	55	0.056	TCTTGCGTGTTTCTGGCTTC	59.8	50	0.200	135	0.255	C	13
256352	TGGTGTCTGTCGATGTGGC	60.753	57.895	1.753	GACACATAGCACCAGTTCACC	59.675	52.381	1.325	100	3.078	ATC	8
256531	AGAAGACAACCACATTCCACC	58.903	47.619	2.097	TACCGCCCTTACCACAACC	60.082	57.895	1.082	137	3.178	C	14
256674	TCCATAGGCGTAACTTGGAGG	60.008	52.381	1.008	TCGTTCCTCCTCTCTGTGTG	59.508	55	0.492	134	1.500	C	13
256784	GTTTCGGAAGCTAGCTCTGC	59.734	55	0.266	TTCCTGAGGTGAATGGAGCG	60.51	55	0.510	108	0.776	C	12
257009	AAGACCAGCGCCTTTCAAAC	60.081	50	0.081	TGAAACGCTGTTAGTAGTGCAG	59.693	45.455	2.307	113	2.388	A	10
257012	TGCAGTCAAGAGAAGGAAGC	58.578	50	1.422	GTCGTTTCTGTCGGACTTGG	59.597	55	0.403	101	1.825	A	11
257131	TGTCTGAAGGCCTATTTGAGTG	58.825	45.455	3.175	GTGTCTCTCCACCACTACAC	58.021	55	1.979	132	5.154	AC	17
257135	AAATCCGCCAATCCCACACC	61.738	55	1.738	ACAGATAAGAAACGCAACTGTG	58.017	40.909	3.983	124	5.721	C	12
257505	AGAAGCAGCGATGTTATGGG	58.795	50	1.205	TGGCTGTACTCTTCACGAAC	58.312	50	1.688	106	2.894	A	12
257743	CTGTCTACGCCGATTCTTGC	59.807	55	0.193	ACTAGTTATGCGCCGGTGG	60.604	57.895	1.604	118	1.796	C	13
257779	CGCGGAAAGGAGAGCAATAAC	60.413	52.381	1.413	TCCACTTGCTTGTTATGCCC	59.216	50	0.784	107	2.197	A	11
257944	AGAATGCGAAATGTTGCAGAC	58.537	42.857	2.463	TGTGGCCTGTCTAACTCTACC	59.593	52.381	1.407	125	3.870	A	12
258405	GACTACGCTATCCCGGCC	60.087	66.667	2.087	GAACCGTTAACATTCCCGCC	60.292	55	0.292	102	2.379	AAT	8
258555	TGTGCCAGAACTGAAACCAC	59.366	50	0.634	TCTCAGTAGACATTTGCGGG	58.079	50	1.921	135	2.554	AC	21
258690	GATAAGGCAGCCATAGTCGTC	59.070	52.381	1.930	AGGCAAGTTTATCCAGATGCTG	59.483	45.455	2.517	109	4.447	AAT	8
259125	TTGTATTTGTGCTGCCTGAAC	58.111	42.857	2.889	CCTTAAACCCGCACTTTCCC	59.867	55	0.133	126	3.022	C	12
259307	GCTCGGGTTGTCATTGGAAAG	60.550	52.381	1.550	TTCAGTCAGCCTTACCACAC	58.213	50	1.787	140	3.338	A	10
259317	TCCTTTCGGTCGCACAGTAG	60.505	55	0.505	AGGTAGTAAGGTTGTCAGCCC	59.868	52.381	1.132	123	1.637	C	12
259537	AAGACATGTCCCGAAACGTC	58.953	50	1.047	CGATGGGATATTGCAGTGTGG	59.877	52.381	1.123	130	2.170	AC	9
259637	TCCTCACTTACTGACGTGCG	60.503	55	0.503	CCGTCACTCAGTCCGCAC	61.156	66.667	3.156	145	3.659	ACGG	7
259660	TCTCTCTCTTATGCATGCACAC	58.970	45.455	3.030	GAGCAGGCAGTTACAGTGTG	59.591	55	0.409	116	3.440	AAAC	7
259842	GAGGGCTCTAAATTGCTAGGC	59.260	52.381	1.740	TTTCCTCTGGACCGTACCTC	59.211	55	0.789	144	2.530	A	10
259911	AGAGGAGGTTTGTACAGCGG	60.152	55	0.152	ACGGTGACTGGGAGGTAAAC	60.079	55	0.079	124	0.231	A	14
259950	GTAAACGTCGGATTCTGAACAC	58.434	45.455	3.566	CAACTACCACCAACGCCG	59.475	61.111	2.525	100	6.091	ACC	15
260253	CCACTCATTCGTAACTTTGGC	58.271	47.619	2.729	ACCCAATCTCTTCCACTCCC	59.488	55	0.512	125	3.240	C	10
260295	CACATTGAATTGTTGCCGCG	60.016	50	0.016	ACCTGCTACTGGTCTGAGC	59.476	57.895	1.524	144	1.540	A	11
260462	TCACAGGTTTGCACAATAAGC	58.111	42.857	2.889	GCTGCTGTTTCCACTACTGTAC	60.014	50	2.014	130	4.903	ACT	8
260603	GACGCGCATACAGACAGATAG	59.422	52.381	1.578	TCTGCCTGTCTGCCTGTTTC	61.011	55	1.011	138	2.588	AGGC	22
260604	TGTTACAGTGCTGAGACACAC	58.930	47.619	2.070	GGCGCAAACAACACTCCC	60.395	61.111	2.395	141	4.466	C	14
261053	GCCCAAGTCTTCCAAACGAC	60.152	55	0.152	AGATGGGCAGGACATGTGAC	60.513	55	0.513	110	0.665	A	13
261080	TGTGTGTGTCTGTAGCACTTAC	59.042	45.455	2.958	CACTCAAACACCCTCTCCCG	61.075	60	1.075	102	4.033	AC	12
261080	CTGTATCTGGCACCGTCAG	58.385	57.895	2.615	TCTGCAGATCTGACGCCC	59.849	61.111	2.151	122	4.766	AC	14
261080	CACACACTGTATCTGGCACC	59.304	55	0.696	GGTGTGAGAGCGGTTGTC	58.776	61.111	3.224	102	3.920	AC	14
261082	TTACAAGATCCCGCCACCTG	60.511	55	0.511	CCTACCAACTCACCCGCG	60.861	66.667	2.861	104	3.372	C	15
261254	TGCGTAAACAATTGAAATGCGG	59.761	40.909	2.239	CAGCAGTCCCAATACCACAAC	59.943	52.381	1.057	146	3.296	C	12
261291	CCTTCCTTCACTCTTTCGTTCG	60.015	50	2.015	TGTAGGAAGGTGTGAATGAAGG	58.485	45.455	3.515	114	5.530	AAGG	11
261408	TGCAAAGTGTGATGGAACCG	59.798	50	0.202	AAATGTCTTCCCAGCATCGC	59.654	50	0.346	139	0.548	C	13
261473	TGCAAAGTGTGATGGAACCG	59.798	50	0.202	AACATGTCTTCCCAGCATCG	59.01	50	0.990	140	1.191	C	13
261547	TGATGCTGTTCCGGGTGC	61.106	61.111	3.106	TGCTCGTCCTATATCACCACC	59.803	52.381	1.197	134	4.303	ACC	12
261607	TCAGACTTCGAACAGCCAAG	58.593	50	1.407	GTAGCACACGATATCACCGC	59.601	55	0.399	112	1.807	AC	8
261766	TACCCACAGCCTTGAGAGTC	59.499	55	0.501	ACCCATCACCATGCTCCAG	60.157	57.895	1.157	118	1.658	C	13
261816	GATCACTGCTGGCTCAAGAG	59.092	55	0.908	GCAGCCAGTTCTTAGTGTCC	59.303	55	0.697	116	1.605	AAT	11
261857	GACACGTCCAAATACTGCGC	60.633	55	0.633	TGTCGAAGCAACACCATCAC	59.519	50	0.481	141	1.115	A	10
261969	TACAGCCGTCAAAGAATGCG	59.663	50	0.337	GCCTGTAATGGGACTGCTTTAC	60.077	50	2.077	115	2.414	A	12
262071	ATGTTTCTTACGCTGCCTCC	59.013	50	0.987	TCTACAGCTGCCGTATTTGTC	58.862	47.619	2.138	118	3.125	A	10
262325	TGAGGCGCAGTGTTGGTG	61.332	61.111	3.332	CCTTATTCGGGCCTCTGC	58.277	61.111	3.723	130	7.055	AT	8
262340	GACCAGATCAGCGTTACGTTAG	59.635	50	2.365	ATGCTACGTGACGATTGGTG	59.1	50	0.900	137	3.265	A	10
262546	GTAGCACGTGTGAAAGAAAGG	58.217	47.619	2.783	CCCAAAGGTCCACTGTCATG	59.219	55	0.781	133	3.564	C	10
262607	GCAGCAGACCAGAATGAGAAC	60.013	52.381	1.013	CTTCAGCGATTTCCCACGAC	60.014	55	0.014	144	1.026	A	11
262767	TCGCTTTCACTTTCCAACCAC	60.079	47.619	1.079	CTGAGCACTGTCCTGTTAAGC	59.676	52.381	1.324	111	2.403	AG	9
262950	CCTTGACCTTTCTCAGATGGTG	59.422	50	2.578	AGAACAGAACAACAGCAATGTG	58.457	40.909	3.543	145	6.120	AAC	18
262993	CCGCAGACAATTTCATGCCG	61.259	55	1.259	AGACGCAACAACCAATCGAC	59.873	50	0.127	122	1.385	A	11
263046	ATCCACGCCTTAGACCGC	60.242	61.111	2.242	TTTCAACTTATGTAGGCGTTGC	58.337	40.909	3.663	124	5.905	C	14
263046	GGCCTTCGACTGTTTACACG	59.945	55	0.055	ACACACAGCGTTATCTACACG	59.148	47.619	1.852	133	1.907	ACTG	7
263138	TTCTCGAATTAATGCCGCCG	59.804	50	0.196	ACTTTCCCGCTCCTCCATTG	60.801	55	0.801	109	0.997	C	10
263224	CTTGTCAGTGTTCCCATGAGG	59.328	52.381	1.672	CATAGGGCTGCACAATACGC	60.152	55	0.152	103	1.824	A	11
263268	TGTCTAAGCATCCACAGACTG	58.160	47.619	2.840	TCACTCTGAGTATCGCCGC	60.011	57.895	1.011	114	3.851	C	14
263327	AAATCCAGTTCCCACCTCAC	58.182	50	1.818	TTACTTGTGATGTGGCTGGAG	58.704	47.619	2.296	116	4.114	AAAT	7
263556	CCCTTTGACAGCTAGAGTAACG	59.240	50	2.760	TTGTCGGTCAGTGTACAGGC	60.719	55	0.719	121	3.479	AAC	15
263827	TGGAAGTGCGAGTGGTTAGC	61.073	55	1.073	TGTTCCAGTGTTCATGCTGC	59.797	50	0.203	142	1.276	C	15
263838	GCCCTTCTCTCGAGTTCATG	58.811	55	1.189	GAGTTACAATCGGTCCTGGC	59.093	55	0.907	105	2.096	A	10
263930	GATCGCCGCTGGTTCAAG	59.630	61.111	2.370	TCCCGGATTATGATGCCTGG	60.078	55	0.078	124	2.449	AAC	11
263971	GAGGTGTCGTACAAACCGATG	59.749	52.381	1.251	TATCGCCGCAAACCAAGATG	59.73	50	0.270	130	1.521	A	10
263987	TCCGTCTGTTATTTGCATGGG	59.395	47.619	1.605	CAGTGCATCAACCAACTGCG	61.122	55	1.122	113	2.726	A	13
264104	CCCAATGCACACCTTAAACTC	58.177	47.619	2.823	ACAGCTAATTGTGTGAGGATGC	59.75	45.455	2.250	104	5.073	AC	17
264228	AGCCTATGTTCCCAGTCCAG	59.566	55	0.434	ACATGACCCGCACACTCG	60.784	61.111	2.784	103	3.219	A	11
264279	GGGCTTCTACCGAAATTCAGAG	59.559	50	2.441	TGTGTAATCTGACGTGTCGAC	58.815	47.619	2.185	114	4.626	A	10
264346	ACCCTTCGCTCCACAATCTC	60.510	55	0.510	CGTCTGTGCGTCCCTTAAAG	59.666	55	0.334	140	0.844	A	10
264533	AAGTTACACTGGCCGTCGC	61.407	57.895	2.407	TCGAAGTCTTCCTATGCCCTG	60.009	52.381	1.009	125	3.416	ATC	13
265257	AGTCATGGAGGAGTCGAATGG	60.008	52.381	1.008	CTCACACGCCACCTGTCC	61.094	66.667	3.094	119	4.102	A	11
265314	CGTCTTCTCAATCCATCCACC	59.198	52.381	1.802	CACACAGGCACGAAGGAAAG	60.152	55	0.152	100	1.954	ATCC	7
265368	GTTCCACGGACCCTTCTTCC	61.079	60	1.079	TTGTTAAGGAGGAGGCCACG	60.439	55	0.439	122	1.518	C	14
265380	ATGCTTCCACATGTTCCCAC	59.213	50	0.787	ACAGTCACCAGCTTGTCATC	58.578	50	1.422	120	2.209	A	10
265668	CAGGGCTGCATTTAGTGGG	59.255	57.895	1.745	CCTCACACCCACCTCAACC	60.686	63.158	1.686	104	3.431	C	12
265711	GTCTTTGACTTCCTGACGGC	59.592	55	0.408	GGCTTCGGTGGTGCTACAG	61.484	63.158	2.484	143	2.892	C	12
265842	TGAGGACCTGTTTGCGTCTC	60.720	55	0.720	GTGCCACTGGATCAACTGAG	59.302	55	0.698	130	1.418	ACTG	6
265946	CGGAACTACGTAAACAAGGAAC	58.105	45.455	3.895	TGATGAGGGTTTCTTGTGGG	58.183	50	1.817	108	5.712	ACC	8
266229	GAGACATATCCCTGCGTTGG	58.877	55	1.123	TTTGTTACGGTCTGGCAAGG	59.153	50	0.847	121	1.970	AC	17
266428	TTATCTCCTCGGTCTGTTCAAG	58.042	45.455	3.958	CAGCGGACTACACATGGAAC	59.381	55	0.619	133	4.576	A	11
266594	CGAGTCATGCCGTTATATACCG	59.572	50	2.428	TAGGTCGAAACATGTAGCGC	58.822	50	1.178	134	3.606	AAC	11
266850	TCTTTCTTCAGCCTCTTACGTC	58.582	45.455	3.418	TATAATCACGCCCGACCATG	58.301	50	1.699	126	5.117	AC	25
266861	CGTTTCGGAGGCTGGCTC	61.547	66.667	3.547	ACTGGCTCCCTCTGTCAAAG	60.079	55	0.079	100	3.625	C	11
266874	CCCTGTGCGTCTTGTTCAAC	60.431	55	0.431	CAGGCCTGTAATGGGAATGC	59.722	55	0.278	114	0.709	A	11
267037	ACTGGACCCTACTAACGAGG	58.625	55	1.375	CTACCAAGTATCACGCAGCC	59.17	55	0.830	128	2.205	A	10
267098	CTCAGGAAGGACTCTGCTCC	59.936	60	0.064	TGAGATGTCAACGTGCAACC	59.519	50	0.481	113	0.545	AACT	8
267120	TCCCGAGTATTTCAGTCTTCCC	60.009	50	2.009	CTACGAACACACCGCAACC	59.869	57.895	1.131	123	3.140	ATC	9
267124	ACTGGACCCTACTAACGAGG	58.625	55	1.375	GCCTACAATTTATCCCGAAGCC	60.207	50	2.207	129	3.582	A	11
267152	GAAGGCCTCTGGTCCATGG	60.537	63.158	1.537	ACGGAGCTAAACGGTAAATGG	59.129	47.619	1.871	114	3.407	AACT	7
267163	CGGTATCTCAAACAACAGAGCG	60.396	50	2.396	TGGTGTAAGACTGCTGCCAC	61.009	55	1.009	131	3.405	AAT	10
267409	AGCCTAGCCTACCCTACCC	60.234	63.158	1.234	GGTTAGGTTGGGTCGGGTC	60.459	63.158	1.459	104	2.693	AACCT	9
267467	CTATCTAACTGCCTGCCTGC	58.873	55	1.127	TAGGCAGACAGACAGGTACG	59.294	55	0.706	111	1.832	AGGC	8
267665	CCACACACTGCAGGAATTGG	60.152	55	0.152	CCCAGAAACAGGTCCCTTAC	58.27	55	1.730	117	1.882	C	32
267717	TGTTAATTCTACAGGCAGGTCC	58.554	45.455	3.446	TTTATGGCCGGCTGATGG	58.173	55.556	3.827	103	7.273	A	18
267748	GTGCACTACCACCTAACCC	58.204	57.895	2.796	GCTTCTACTTTCCGTTCGTTTG	58.942	45.455	3.058	107	5.854	C	10
267831	TGTTAATTCTACAGGCAGGTCC	58.554	45.455	3.446	GGATTCACAGTGTTCCAGCC	59.583	55	0.417	132	3.863	A	17
267918	CGGAGTACCTAGCTTCATTCG	58.742	52.381	2.258	GATCTACGCTAGTGTACTGACC	58.278	50	3.722	123	5.981	AC	19
268008	CAGGGCTCAACATTCTGCAG	59.940	55	0.060	TTTACAAGTTTACAGGCTGCAC	58.194	40.909	3.806	133	3.866	AC	18
268050	GTGTGTGGGAGTACGGAGG	60.158	63.158	1.158	ACTACTCCCGATCTCCCTCC	60.298	60	0.298	142	1.455	C	12
268126	CGCTTTGGAAGACGCTATGG	60.083	55	0.083	GTCCCTATGCGTGCTGTATG	59.24	55	0.760	103	0.844	AACG	9
268250	CAGGGCTCAACATTCTGCAG	59.940	55	0.060	TTACCAGTGTACAGTCTGCAC	58.375	47.619	2.625	132	2.685	AC	18
268341	GACTACGTTACGCCGATTGC	60.153	55	0.153	CCATTTCCGCACAGTCCATC	60.011	55	0.011	121	0.164	AAT	10
268534	CGCCTGCAGATAATGTAAGTTC	58.286	45.455	3.714	ACAGCTGACCCTCGCTTG	60.4	61.111	2.400	126	6.113	A	10
268567	CAGGGCTCAACATTCTGCAG	59.940	55	0.060	TACCAGTGTACAGGCTGCAC	60.438	55	0.438	131	0.498	AC	18
268751	GCATTATGGTGGTCGGAAGC	60.082	55	0.082	ACGCAAAGGAAACGAAAGGC	60.712	50	0.712	127	0.794	AAAGG	6
268760	GGGAGAAATGGCCTGTGG	58.408	61.111	3.592	GTCGTCACGTTGCTGGAAC	60.159	57.895	1.159	120	4.750	ATC	10
268780	GACTGGGAATCTGTACCGGG	60.295	60	0.295	CTCTACCTCTACAACCCGCC	60.009	60	0.009	103	0.304	C	23
269250	TGAATCCAATCCAGCCCACG	61.158	55	1.158	CGCACCCAAATCCACACTG	60.158	57.895	1.158	135	2.316	C	17
269266	TGGATAAGTTCGGCCATTCC	58.419	50	1.581	AGTGCACCGTCTTTGATCTG	58.947	50	1.053	113	2.634	A	16
269443	AAGAAGAAAGGCCCTGCTTG	59.139	50	0.861	CACCTGTCCTACTGCAAGAG	58.373	55	1.627	142	2.489	A	10
269486	GCGGTTGAGAGTGATCAGTG	59.384	55	0.616	GGTATCCTGTTCAACTGTCGG	59.133	52.381	1.867	148	2.483	C	11
269590	TGGGTGACATATGCCAGAAAC	59.044	47.619	1.956	TGAGGTCAGGGCATTATCGG	60.007	55	0.007	100	1.963	C	11
269678	TCTTCTGGGATTGGTACGCC	60.224	55	0.224	GTGTTTGTCGTGGTTGGCTC	60.709	55	0.709	116	0.932	C	14
269716	ATTCCCATTGTCACCACTGC	59.213	50	0.787	AGTGGGATAACAGGCTTAATGG	58.607	45.455	3.393	133	4.180	ATC	8
270106	GCAGGCAGTGACTTAGGTTG	59.587	55	0.413	AACCTGCCTAGCTGATTAACC	58.485	47.619	2.515	131	2.928	C	15
270110	GAACTCGCAGCAGGAAATGG	60.292	55	0.292	TGACGTGAACTTGCAGTGAG	59.17	50	0.830	117	1.122	A	12
270165	ACTCGTCGGCTAATTCTTCC	58.166	50	1.834	AAACACGAAAGAACCGCACG	60.704	50	0.704	123	2.538	A	10
270634	TGCACAGAAACACCTAGACC	58.213	50	1.787	GCTAGGCTAGGTTCGGTTAGG	60.419	57.143	1.419	104	3.206	AACCT	7
270634	CGCTGGTAAAGTAACTGGTCAG	59.757	50	2.243	TAACCGAACCTAGCCTAGCC	59.357	55	0.643	101	2.886	AACCC	7
270666	CCAATGTACATTCAGCTCCGC	60.415	52.381	1.415	TAAAGCGGGCAGGACTACAC	60.509	55	0.509	132	1.924	C	15
270981	TTGGGTTGGGTCGGGTTAG	60.004	57.895	1.004	TCTTTCCCTACACGACGCTC	60.223	55	0.223	100	1.227	AACCT	8
271113	GCCTGGGAGATGTGAAAGTG	59.296	55	0.704	GGTTAGCTGGAAGAAGAAAGGC	60.012	50	2.012	112	2.716	A	10
271196	AAGTTGGCGTGATTGAGAGC	59.587	50	0.413	CGATTTCCGCCTTGTCGG	59.631	61.111	2.369	104	2.782	C	23
271444	TGACGGTGGAGGTGAATGTG	60.723	55	0.723	TAGCGCATTGTCTGTTCCTG	59.021	50	0.979	118	1.702	ACC	13
271554	GTAGAAGCCTGAAGTCACGG	58.745	55	1.255	CCACACAGCCTATTACGCAG	59.451	55	0.549	138	1.804	C	11
271600	TGCCGGATCAGTGTGGTAAC	60.794	55	0.794	GCTCGCCTACAAATGGCAAC	60.918	55	0.918	139	1.712	A	10
271944	CGGAGTATCGGGTAGTAGGG	58.936	60	1.064	GTTCTCCCTCTTGGCCACC	60.762	63.158	1.762	136	2.826	C	10
272060	TGATTCAGTCTGGTTCAATGGC	59.683	45.455	2.317	TGTGTATATTGTTCTCGGCCG	58.933	47.619	2.067	107	4.385	C	22
272444	CCACGATGACTAAGCAGGTG	59.098	55	0.902	TCAACCAATCACTCAACTCCAG	59.024	45.455	2.976	123	3.879	C	12
272780	ATTTGCTGAATTCACTTAGGCG	58.393	40.909	3.607	CTCTGCGCTGTTGGGTTAAG	59.942	55	0.058	143	3.665	AC	45
273952	TCACCGTTCAGTTTCCACCC	60.940	55	0.940	ACACTGGGACTACTGAAGAGAG	59.347	50	2.653	144	3.593	AG	19
274173	TCCTCTAAAGTTCGCCACCC	60.152	55	0.152	GAGTTAAGGTGTCGTGGAAGC	59.679	52.381	1.321	100	1.473	A	10
274274	ACAATCTGGGCTCTTAAGTGC	59.047	47.619	1.953	CAGGATTTGGTTCTGGAAGGTC	59.682	50	2.318	133	4.271	C	13
274343	ACTCAGCACAGATTGACCAG	58.286	50	1.714	GTCTCCGGAAGCCCTCTG	59.849	66.667	2.151	106	3.865	AACT	7
274656	GTATAGCAAAGCAGGAGGGTC	58.918	52.381	2.082	GCTACATTCAGTGCCCTTCAG	59.741	52.381	1.259	145	3.341	A	12
274893	CTCCTCTACTCCTGCAACTTG	58.512	52.381	2.488	GGCTCAGTGTTAATGCAGGG	59.654	55	0.346	138	2.834	A	10
275154	CTGTTTCCGTTCAGCTGCTG	60.500	55	0.500	TGAAAGGACAGTGCAGTGTG	59.084	50	0.916	142	1.416	A	10
275205	GCCACACAGTAGGATTAGAACG	59.564	50	2.436	GGCCGCAGTTTAATCCACTC	60.012	55	0.012	112	2.448	A	13
275209	CGAAATCAGCAAACCGACAC	58.776	50	1.224	GCTAAGAATTTGACCTGGCCG	60.349	52.381	1.349	108	2.573	AAT	14
275230	TCTTCGTGGACATGCTTCTG	58.663	50	1.337	TTCCCGATTAAGAGACGGCC	60.295	55	0.295	100	1.632	C	14
275850	CTTTAAGTACAGACACCGGCC	59.406	52.381	1.594	GTTTGATAACCGGCAGCGG	60.304	57.895	1.304	100	2.898	C	16
276012	GCACAACTGATACACCGCTG	60.291	55	0.291	ACCTACATCACAATTTCAGGCC	59.415	45.455	2.585	111	2.876	A	10
276037	TCAGGCATTTAGTGTGTTTGC	58.111	42.857	2.889	GTAACTGTTTAGGGCCTGCG	59.66	55	0.340	136	3.229	A	11
276037	GTAACTGTTTAGGGCCTGCG	59.660	55	0.340	TCAGGCATTTAGTGTGTTTGC	58.111	42.857	2.889	136	3.229	A	11
276085	AAACGTTTGTCCAGTTTGCC	58.457	45	1.543	GCTGGTGATCTGTTCTTTAGCC	60.077	50	2.077	113	3.620	A	10
276226	GGTGGAGGATGAGCATTCCC	60.946	60	0.946	ACATGTGCCTCTTCTTATCCC	58.202	47.619	2.798	118	3.744	C	14
276489	GTCTGTGTGCTTTCCGGTG	59.792	57.895	1.208	AAACACCGCCACTAACACAG	59.444	50	0.556	108	1.764	AC	11
276554	GGTGTGTGTTTAGTGTTACAGC	58.541	45.455	3.459	GCAGGTATCCGTTCAGCATG	59.802	55	0.198	121	3.657	A	10
276580	CGTTGCAAACTTGGTGTGAC	59.185	50	0.815	AGCCAGCTGTTTATGCGTTC	59.941	50	0.059	120	0.874	C	10
276709	TTACACCTTAACACCGTCCG	58.309	50	1.691	GTGCAACAGAACGCTATGAAAC	59.512	45.455	2.488	118	4.179	A	10
276823	GACTTGTATCATCAGCGACACC	59.887	50	2.113	CTGCGCCTCCTGTTCCTG	61.174	66.667	3.174	101	5.288	C	19
277007	TCAACATTATGCATACCAGCCG	59.882	45.455	2.118	CTCAACCAACTGCGCCAC	60.088	61.111	2.088	102	4.206	C	14
277089	GTGCTGTTGACTGTGTACTGG	59.879	52.381	1.121	TCCATTCTCTTGCTTTGTGGG	59.249	47.619	1.751	132	2.872	C	24
277356	CTGGGCTCGACTCAGTCTC	59.936	63.158	1.064	CGGCGGTAATGTTGTAAGCC	60.361	55	0.361	102	1.425	C	13
277396	ATGCACCACCAAAGACTGAG	58.857	50	1.143	AAAGCCATCATCAGGTGCAC	59.578	50	0.422	132	1.565	AT	10
277568	CATTTCCCGCCAAATTAACAGG	59.236	45.455	2.764	CTGGTTGCCTTCTGTGTTCC	59.797	55	0.203	127	2.968	A	12
277603	GGGAAAGTTGACTGTGAAGGAC	59.882	50	2.118	ACGATCCATCACTCTCGCAC	60.644	55	0.644	119	2.763	A	10
277777	TGAGACGGGCTAATCACTCC	59.648	55	0.352	CCCAAATAAGGCCTAGGTTGC	59.734	52.381	1.266	122	1.618	AC	16
277787	GATAGCCTTCTCCGAACGTG	58.896	55	1.104	TATCCTCAGTTCCGCCTACC	59.064	55	0.936	136	2.040	A	11
278071	TGTCATGCCAGAATAGGAGC	58.132	50	1.868	GCACAGGATTTCGAAGTATGTG	58.48	45.455	3.520	100	5.388	ACT	13
278201	GATCGGAGTTTGATTCGCGG	60.153	55	0.153	CCTGCCCAATTACCACTTCG	59.655	55	0.345	115	0.497	A	10
278325	GTGGTGTGTGAGGAAATGGG	59.508	55	0.492	TCACACAAGCGTCTACACCC	60.719	55	0.719	120	1.210	C	21
278432	GTGCACAGTTACCGTTCGTC	60.222	55	0.222	GATCACGGCTGGTTCAAGAG	59.379	55	0.621	133	0.843	AAT	11
278617	GCAGAGCAGGCATATACGTC	59.315	55	0.685	ACTCCTTGATCTGGCGTTTC	58.652	50	1.348	136	2.033	A	10
278735	GTGCCTGTATGCTTGCCTAC	59.729	55	0.271	AGCAGGAGGTTAGAGGCTTG	59.861	55	0.139	136	0.410	AGGC	6
279110	TCATTTGTCACTTTCTGCAGC	58.118	42.857	2.882	CTCATAGCTTGTGACTGACCC	58.856	52.381	2.144	118	5.026	AC	28
279189	TGTAATTACAGCGTTGCCAAC	58.199	42.857	2.801	GGTGGAACGATATTGACAGGG	59.195	52.381	1.805	132	4.607	A	10
279239	TAGCTTCTCAAGACGGCCTC	59.938	55	0.062	GTAGGAACGTAGGCTGAGGG	60.009	60	0.009	133	0.072	AACT	12
279376	GCCAACATTTGTAGCTAGTTGG	58.656	45.455	3.344	ACCCAACCAAACCAAACCC	59.158	52.632	1.842	119	5.185	AACC	15
279409	GGCTGGTAGGCGTAATGTTAC	59.541	52.381	1.459	TTTCTGCCATGCGAGCAAC	60.158	52.632	1.158	127	2.617	A	11
279610	CCGTACCAAATGTTACTCGGC	60.081	52.381	1.081	TCGACCTTCCAAGCACTCAC	60.72	55	0.720	115	1.801	A	11
279639	GCGAATAGGTGCGTGCATG	60.734	57.895	1.734	ACAACAGTGTCACATCCTGG	58.497	50	1.503	108	3.237	AC	9
279644	CCTTCACAACTTCCTCGCAC	59.872	55	0.128	ACCTTCACTCCCAACACCTC	60.006	55	0.006	129	0.133	C	13
280361	GGTGCTTGTCGTTACCATGG	59.941	55	0.059	AATTGAACACGTGGCCTTGG	60.081	50	0.081	100	0.139	C	16
280388	GGCTCTCCTCTCCCACATATG	60.146	57.143	1.146	TGTTGTCAAATGTAACGTCACC	58.21	40.909	3.790	109	4.936	C	10
280880	CTGAGTGTGATCGTGAAGCC	59.384	55	0.616	CCCGCTGTCATAACCTACTC	58.236	55	1.764	121	2.379	A	11
280901	CATACACCTTCATGATCTCGGG	59.101	50	2.899	CTTTCGGCAAGTGTGGGTAG	59.588	55	0.412	118	3.310	C	17
280946	GATCACGGCTGGTTCAAGAG	59.379	55	0.621	AGCATATGGACTTGAGCAGAAG	58.96	45.455	3.040	102	3.661	ACT	8
281005	CAAGAATGACTGCGGCCG	59.936	61.111	2.064	GTTCAGACGTGTGCTCTTCC	59.596	55	0.404	127	2.469	A	12
281031	CATTGATGAGGAAGCGGCAG	60.082	55	0.082	CGTTTCCGCGCAGTTATGTC	60.97	55	0.970	141	1.052	C	11
281048	CAGTCGATACACAGTCTGCG	59.188	55	0.812	CCTGTATACCGCGCAAAGTG	60.083	55	0.083	117	0.895	C	16
281580	AACATCCCTCCTTCCCTTCC	59.484	55	0.516	TTTCCCAACTGACTGTGCAC	59.366	50	0.634	137	1.150	C	14
281749	ATGACGAAGCTAACAGTCGC	59.106	50	0.894	TATTTCCCAGAGCAACACCC	58.259	50	1.741	124	2.635	C	14
281883	AAATGACGTCACATCAGCCG	59.662	50	0.338	TATGGCAGGGACACTCTTGC	60.512	55	0.512	117	0.850	A	10
281911	GGTGGCGTACATAGGACCTC	60.365	60	0.365	GCAAGAACAGAACCCAGTCC	59.512	55	0.488	135	0.853	C	11
282422	TGTCTACGCGCATCTAGAGAG	59.879	52.381	1.121	GATGTCTTGACGGTGGCAAG	59.942	55	0.058	111	1.179	A	12
282531	ACTGTCTTGGCTAGCAAGGG	60.441	55	0.441	CGGTTTGTGGTAGTAAGCCTG	59.676	52.381	1.324	103	1.765	AC	16
282619	GGCAACTAACGTACCAAGTAAC	58.093	45.455	3.907	CACCTCACCATCACAACAGG	59.226	55	0.774	148	4.681	A	10
282647	TCTTTCTGAGTCCTCCTGTGTG	60.141	50	2.141	CCTTGTGGGCCTTCATACC	58.566	57.895	2.434	119	4.576	AC	10
282862	GATATTTCTCGTGCAGCCGG	59.874	55	0.126	ACAGAATCCCGGTTTGCAATG	60.215	47.619	1.215	118	1.340	A	10
282955	GGTCCGCGGGTTGAAGAC	61.475	66.667	3.475	CTCTTCTTTATTGTTTGCGCCC	59.246	45.455	2.754	121	6.229	AC	26
[truncated: 117,191 more rows]
